# Supplementary material for: Impact of aspirin use on clinical outcomes in patients with vasospastic angina: a systematic review and meta-analysis
Source: PubMed Central journal article supplement — BMJ Open. 2021 Jul 29;11(7):e048719. doi: 10.1136/bmjopen-2021-048719 (PMC8323370; doi:10.1136/bmjopen-2021-048719), 2021-07-29
Supplement: bmjopen-2021-048719.draft_revisions.pdf [file bmjopen-2021-048719.draft_revisions.pdf]

# BMJ Open

BMJ Open is committed to open peer review. As part of this commitment we make the peer review history of every article we publish publicly available.

When an article is published we post the peer reviewers' comments and the authors' responses online. We also post the versions of the paper that were used during peer review. These are the versions that the peer review comments apply to.

The versions of the paper that follow are the versions that were submitted during the peer review process. They are not the versions of record or the final published versions. They should not be cited or distributed as the published version of this manuscript.

BMJ Open is an open access journal and the full, final, typeset and author-corrected version of record of the manuscript is available on our site with no access controls, subscription charges or pay-per-view fees (<http://bmjopen.bmj.com>).

If you have any questions on BMJ Open's open peer review process please email [info.bmjopen@bmj.com](mailto:info.bmjopen@bmj.com)

# BMJ Open

## Impact of Aspirin Use on Clinical Outcomes in Patients With Vasospastic Angina: A Systematic Review and Meta-analysis

|                               |                                                                                                                                                                                                                                                                                                                                                                                                                        |
|-------------------------------|------------------------------------------------------------------------------------------------------------------------------------------------------------------------------------------------------------------------------------------------------------------------------------------------------------------------------------------------------------------------------------------------------------------------|
| Journal:                      | <i>BMJ Open</i>                                                                                                                                                                                                                                                                                                                                                                                                        |
| Manuscript ID                 | bmjopen-2021-048719                                                                                                                                                                                                                                                                                                                                                                                                    |
| Article Type:                 | Original research                                                                                                                                                                                                                                                                                                                                                                                                      |
| Date Submitted by the Author: | 05-Jan-2021                                                                                                                                                                                                                                                                                                                                                                                                            |
| Complete List of Authors:     | lin, yaowang; Shenzhen People's Hospital, Department of Cardiology<br>yuan, jie; Shenzhen People's Hospital, Department of Cardiology<br>chen, qiuling; Shenzhen People's Hospital, Department of Pharmacy<br>dong, shaohong; Shenzhen People's Hospital, Department of Cardiology<br>Qin, Haiyan; Shenzhen People's Hospital, Department of Emergency<br>chen, yang; Guangdong Medical University, School of Pharmacy |
| Keywords:                     | Coronary heart disease < CARDIOLOGY, Myocardial infarction < CARDIOLOGY, Vascular medicine < INTERNAL MEDICINE                                                                                                                                                                                                                                                                                                         |
|                               |                                                                                                                                                                                                                                                                                                                                                                                                                        |

SCHOLARONE™  
Manuscripts

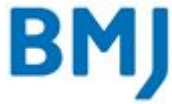

I, the Submitting Author has the right to grant and does grant on behalf of all authors of the Work (as defined in the below author licence), an exclusive licence and/or a non-exclusive licence for contributions from authors who are: i) UK Crown employees; ii) where BMJ has agreed a CC-BY licence shall apply, and/or iii) in accordance with the terms applicable for US Federal Government officers or employees acting as part of their official duties; on a worldwide, perpetual, irrevocable, royalty-free basis to BMJ Publishing Group Ltd ("BMJ") its licensees and where the relevant Journal is co-owned by BMJ to the co-owners of the Journal, to publish the Work in this journal and any other BMJ products and to exploit all rights, as set out in our [licence](#).

The Submitting Author accepts and understands that any supply made under these terms is made by BMJ to the Submitting Author unless you are acting as an employee on behalf of your employer or a postgraduate student of an affiliated institution which is paying any applicable article publishing charge ("APC") for Open Access articles. Where the Submitting Author wishes to make the Work available on an Open Access basis (and intends to pay the relevant APC), the terms of reuse of such Open Access shall be governed by a Creative Commons licence – details of these licences and which [Creative Commons](#) licence will apply to this Work are set out in our licence referred to above.

Other than as permitted in any relevant BMJ Author's Self Archiving Policies, I confirm this Work has not been accepted for publication elsewhere, is not being considered for publication elsewhere and does not duplicate material already published. I confirm all authors consent to publication of this Work and authorise the granting of this licence.

# Impact of Aspirin Use on Clinical Outcomes in Patients With Vasospastic

## Angina: A Systematic Review and Meta-analysis

Yaowang Lin<sup>1,4</sup>, MD; Jie Yuan<sup>1,4</sup>, MD; Qiuling Chen<sup>3,4</sup>, MD; Shaohong Dong<sup>1,4</sup>, MD;

Haiyan Qin<sup>2,4</sup>, MD; Yang Chen<sup>5</sup>, MD

### Author's Affiliation:

<sup>1</sup>Department of Cardiology; <sup>2</sup>Department of Emergency; <sup>3</sup>Department of Pharmacy;

<sup>4</sup>Shenzhen People's Hospital, Second Clinical Medical College of Jinan University,

first affiliated Hospital of South University of Science and Technology, Shenzhen,

Guangdong. No. 1017, Dongmen Northern Road, 518020, Shenzhen, Guangdong, PR

China.

<sup>5</sup>School of Pharmacy, Guangdong Medical University, Dongguan 523808,

Guangdong, China

### Correspondence should be addressed to Haiyan Qin and Yang Chen

Haiyan Qin, MD, e-mail: [lgqinhaiyan@yeah.net](mailto:lgqinhaiyan@yeah.net) and Yang Chen, MD, e-mail:

[ychan227@163.com](mailto:ychan227@163.com).

## ABSTRACT

**Objectives:** The use of aspirin to prevent cardiovascular disease in vasospastic angina (VSA) patients without significant stenosis is yet to be investigated. The efficacy of aspirin use among VSA patients has been investigated in this study.

**Design:** Databases recorded prior to October 2020 were searched for relevant information. Major adverse cardiovascular events (MACE) were the primary endpoint, and myocardial infarction and cardiac death during follow-up were secondary endpoints.

**Participants:** Aspirin use against no aspirin (placebo or no treatment) among VSA patients in the absence of significant stenosis.

**Results:** Four propensity-matched cohorts, one retrospective analysis, and one prospective multicenter cohort, totally comprising 3661 patients (aspirin use group,  $n = 1,695$ ; no aspirin use group,  $n = 1,966$ ) were included in this meta-analysis. Aspirin use and the incidence of MACE with follow-up of 1–5 years were not found to be

1  
2  
3  
4 significantly correlated (combined odds ratio [OR] = 0.90, 95% confidence interval  
5 [CI]: 0.55–1.68,  $p = 0.829$ ,  $I^2 = 82.2\%$ ; subgroup analysis: OR = 1.09, 95% CI: 0.81–  
6  
7 1.47,  $I^2 = 0\%$ ). Aspirin use was found to be linked with a lower of incidence of  
8  
9 myocardial infarction (OR = 0.62, 95% CI: 0.09–4.36,  $p = 0.615$ ,  $I^2 = 73.8\%$ ) and  
10  
11 higher tendency of incidence of cardiac death during follow-up, but no significant  
12  
13 difference (OR = 1.73, 95% CI: 0.61–4.94,  $p = 0.444$ ,  $I^2 = 0\%$ ).  
14  
15  
16  
17  
18  
19

20 **Conclusion:** Aspirin use is not likely to reduce future cardiovascular events in VSA  
21  
22 patients without significant stenosis.  
23  
24

25  
26 **Keywords:** aspirin, vasospastic angina, MACE, cardiac death, myocardial infarction,  
27  
28 longtime follow-up  
29  
30  
31  
32  
33  
34  
35  
36  
37  
38  
39  
40  
41  
42

### 43 **Strengths and limitations of this study**

44  
45  
46 ► This is the first meta-analysis to evaluate the impact of aspirin use on clinical  
47  
48 outcomes in patients with VSA.  
49  
50

51  
52 ► Aspirin use was found to have no significant effect on reducing MACE,  
53  
54 myocardial infarction, and cardiac death in VSA patients without significant stenosis,  
55  
56 as per the outcomes of this meta-analysis. A tendency of higher risk of MACE and  
57  
58 cardiac death was recognized, but not that of myocardial infarction.  
59  
60

1  
2  
3  
4 ▶ Owing to the increased MACE, routine use of aspirin use in VSA patients without  
5  
6 significant stenosis should be avoided.  
7  
8

9  
10 ▶ The conclusions should be confirmed by further randomized controlled trials with  
11  
12 larger sample size.  
13  
14  
15  
16  
17  
18  
19  
20  
21  
22  
23  
24  
25  
26  
27  
28  
29  
30  
31  
32  
33  
34  
35

## 36 **INTRODUCTION**

37  
38  
39  
40 Coronary spasm characterized by vasospastic angina (VSA) is one of the causes of  
41  
42 myocardial infarction with non-obstructive coronary arteries (MINOCA) and  
43  
44 ischemia and non-obstructive coronary arteries (INOCA) [1-2]. VSA patients who  
45  
46 parallelly suffer from endothelial dysfunction or coronary atherosclerosis commonly  
47  
48 use aspirin [3-4] as per the guidelines of the European Society of Cardiology (ESC)  
49  
50 for the management of chronic stable angina and acute coronary syndromes [5-6]  
51  
52  
53  
54

55  
56 Owing to the latest controversy and reduced key usage of aspirin in preventing  
57  
58 cardiovascular events [7-8], the aspirin's efficiency in VSA patients without  
59  
60

1  
2  
3  
4 significant stenosis has not yet been explained [9-14]. Therefore, this meta-analysis  
5  
6 was planned to assess the correlation between aspirin use and cardiovascular events,  
7  
8 and cardiac death among VSA patients during long-term follow-up.  
9  
10

## 11 12 **MATERIALS AND METHODS**

### 13 14 15 16 *Search strategy*

17  
18  
19 A comprehensive search of related research articles conducted before October 2020 in  
20  
21 various search engines such as PubMed, web of science, and Cochrane Central  
22  
23 Register of Controlled Trials was carried out for gathering data. The keywords were  
24  
25 “vasospastic angina, coronary vasospasms, vasospasm, variant angina, Prinzmetal's  
26  
27 variant angina, spastic coronary angina, coronary artery spasm,” as well as “aspirin,  
28  
29 antiplatelet therapy.” Certain additional related publications, such as review articles  
30  
31 and editorials, were also assessed. This study was registered with PROSPERO  
32  
33 (CRD42020214891).  
34  
35  
36  
37  
38  
39  
40

### 41 42 *Patient and public involvement*

43  
44 Study participants who met the eligibility criteria as outlined above. Participants and  
45  
46 other members of public were not involved in the recruitment, design, conduct,  
47  
48 reporting or dissemination plans.  
49  
50  
51

### 52 53 *Study selection and data extraction*

54  
55  
56 Following are the inclusion criteria: (i) diagnosed with VSA on provocation test, (ii)  
57  
58 absence of significant stenosis ( $\leq 50\%$ ), (iii) the treatment group was administered  
59  
60



1  
2  
3  
4 oral aspirin and the control group no aspirin or placebo, and (iv) articles published in  
5  
6 English. The exclusion criteria included significant stenosis ( $\geq 50\%$ ), intravenous  
7  
8 aspirin, case report, and case series. Two investigators, namely, Lin and Chen,  
9  
10 extracted the study data, which have been presented in Table 1  
11  
12  
13  
14

### 15 ***Data analysis and subgroup study***

16  
17  
18 Major cardiovascular adverse event (MACE) was the primary endpoint, while  
19  
20 myocardial infarction and cardiac death during follow-up were the secondary  
21  
22 endpoints. MACE has been described as cardiac death, acute coronary syndrome, and  
23  
24 hospitalization due to unstable angina, percutaneous coronary intervention,  
25  
26 symptomatic arrhythmia in heart failure, appropriate implantable  
27  
28 cardioverter-defibrillator (ICD), and shock. The Cochrane Collaboration tool was  
29  
30 utilized to assess the risk of bias in the included studies. If  $I^2 > 50\%$ , the random  
31  
32 effect model was used to assess heterogeneity, whereas if  $I^2 < 50\%$ , the fixed effect  
33  
34 model was used to assess heterogeneity. In the case of high heterogeneity ( $I^2 >$   
35  
36  $50\%$ ), subgroup analysis was carried out.  
37  
38  
39  
40  
41  
42  
43  
44

### 45 ***Statistical analysis***

46  
47  
48 STATA software (version 14.0; StataCorp, College Station, TX, USA) was utilized to  
49  
50 perform the meta-analysis. MACE, the primary endpoint, and myocardial infarction  
51  
52 and cardiac death, the secondary endpoints, were evaluated as combined odds ratios  
53  
54 with 95% confidence intervals (CIs). Heterogeneity between studies was derived with  
55  
56 the help of  $I^2$  statistic. Subgroups were studied to reduce the heterogeneity if  $I^2 >$   
57  
58  $50\%$ .  
59  
60

1  
2  
3  
4 Publication bias was evaluated with the help of Begg's funnel plots.  $P$  values  $< 0.05$   
5  
6 were considered to be statistically significant.  
7  
8

## 9 10 **RESULTS**

### 11 12 *Characteristics of included studies*

13  
14 Various search engines mentioned hereinbefore were scanned to identify about 3,645  
15  
16 related studies, among which 1,303 articles were duplicated whereas 2,414 articles did  
17  
18 not fulfill the inclusion criteria and were thus expelled from the study. Therefore, four  
19  
20 propensity-matched cohorts, one retrospective analysis, and one prospective  
21  
22 multicenter cohort (Figure 1), including a total of 3,661 patients (aspirin group,  $n =$   
23  
24 1,695; no aspirin group,  $n = 1,966$ , Table 2) eventually formed part of the study. All  
25  
26 studies except five studies provided the secondary endpoint, with follow-up durations  
27  
28 ranging from 1 to 5 years (Table 1).  
29  
30  
31  
32  
33  
34  
35

### 36 37 *Primary and secondary endpoints*

38  
39 No significant correlation was recorded between aspirin use and MACE incidence  
40  
41 with follow-up of 1–5 years (combined odds ratio [OR] = 0.90, 95% confidence  
42  
43 interval [CI]: 0.55–1.68,  $p = 0.829$ ,  $I^2 = 82.2\%$  [Figure 2]; subgroup analysis: OR =  
44  
45 1.09, 95% CI: 0.81–1.47,  $I^2 = 0\%$ , [Figure 3]).  
46  
47  
48  
49  
50

51 Myocardial infarction was reported in four studies, and cardiac death was reported  
52  
53 in five studies for the secondary endpoint. Moreover, aspirin use was tended to be  
54  
55 linked to a lower incidence of myocardial infarction (OR = 0.62, 95% CI: 0.09–4.36,  
56  
57  $p = 0.615$ ,  $I^2 = 73.8\%$ ) and a higher incidence of cardiac death during follow-up (OR  
58  
59  
60

1  
2  
3  
4 = 1.73, 95% CI: 0.61–4.94,  $p = 0.444$ ,  $I^2 = 0\%$ ), but statistical difference was lacking  
5  
6  
7 between the two groups (Figure 4).

### 8 9 10 ***Risk of bias assessment and publication bias***

11  
12  
13 A high risk of bias was exhibited in selective outcome reporting and assessment by all  
14 included studies. Publication bias with the studies of Lee and Lim was presented by  
15 an asymmetry in the funnel plot (Figure 5). Between-studies heterogeneity on MACE  
16 related research was 82.2%. Therefore, the outcome of subgroup analyses of  $I^2$  was  
17 0%, indicating low publication bias (Figure 3). The between-studies heterogeneities  
18 on myocardial infarction and cardiac death related studies were found to be 73.8%  
19 and 0%, respectively, indicating the occurrence of high publication bias regarding  
20 studies on myocardial infarction (Figure 4).  
21  
22  
23  
24  
25  
26  
27  
28  
29  
30  
31  
32  
33

## 34 35 **DISCUSSION**

36  
37  
38 Aspirin use was found to have no significant effect on reducing MACE, myocardial  
39 infarction, and cardiac death in VSA patients without significant stenosis, as per the  
40 outcomes of this meta-analysis. A tendency of higher risk of MACE and cardiac death  
41 was recognized, but not that of myocardial infarction.  
42  
43  
44  
45  
46  
47  
48

49  
50 Coronary artery spasm (CAS) appeared to play a significant role in the  
51 pathogenesis of ischemic heart disease, besides acute coronary syndromes (ACS) or  
52 chronic coronary syndromes (CCS) [15]. A common mechanism by which myocardial  
53 infarction (MI) or MINOCA manifests by thrombus formation. Aspirin inhibits  
54 cyclooxygenase-1 by reducing the production of thromboxane A2 and therefore has  
55  
56  
57  
58  
59  
60

1  
2  
3  
4 been extensively used in primary or secondary prevention of thrombosis among  
5  
6 patients with atherosclerosis or coronary artery disease [16-17], yet being  
7  
8 controversial in VSA patients. Earlier studies have evidenced aspirin use to aggravate  
9  
10 CAS due to the lowered production of thromboxane A<sub>2</sub> and increase MACE  
11  
12 incidence in VSA patients [18-19].  
13  
14  
15

16  
17  
18 MACE incidence exhibited by patients administered low-dose aspirin was  
19  
20 reported to be significantly higher than that among patients not administered aspirin  
21  
22 (hazard ratio [HR] = 1.54; CI: 1.04-2.28;  $p = 0.037$ ) with a 52-months median  
23  
24 follow-up period [11]. On the contrary, MI (HR = 0.13; CI: 0.03–0.61;  $p = 0.014$ ) and  
25  
26 chest pain recurrence (HR = 0.29; CI: 0.12–0.71;  $p = 0.006$ ) were observed by Lee et  
27  
28 al. to have been significantly reduced by aspirin use among VSA patients during  
29  
30 follow-up [9]. Acute intimal tears and erosion identified by Optical coherence  
31  
32 tomography (OCT) are susceptible to thrombosis leading to MI as per Lee's findings.  
33  
34 Therefore, aspirin was thus evidenced to reduce adverse events in VSA patients with a  
35  
36 greater number of thrombotic intracoronary lesions. Nevertheless, aspirin use was not  
37  
38 significantly correlated with the occurrence of cardiovascular events among VSA  
39  
40 patients with nonsignificant stenosis during a 49-months mean follow-up period ( $p =$   
41  
42 0.541) Ishi et al. [12]. Moreover, the aspirin-treated group exhibited a similar MACE  
43  
44 compared with the no-antiplatelet agent group (HR 0.96, CI: 0.59–1.55,  $p = 0.872$ ) as  
45  
46 reported by Cho. S.S et al. [13]. Antiplatelet therapy was recently shown by Mori et al.  
47  
48 to exert no beneficial effects on MACE (5.7% vs. 3.6%,  $p = 0.20$ ) among VSA  
49  
50 patients during a 32-months median follow-up period [14].  
51  
52  
53  
54  
55  
56  
57  
58  
59  
60

1  
2  
3  
4 A systematic analysis of the available studies investigating the effects of aspirin  
5  
6 use among VSA patients was conducted. Aspirin use was not linked to a lower risk of  
7  
8 MACE and cardiac death as per this meta-analysis. The subgroup analysis for MACE  
9  
10 indicated that the study by Lee[9] and Lim [11] is quite heterogeneous. The origin of  
11  
12 heterogeneity in these studies may be attributable to chest pain recurrence in the  
13  
14 MACE, which gives an entirely different outcome due to the inclusion of other  
15  
16 literature. Following may be the possible reasons for no beneficial effects of aspirin  
17  
18 use: (i) aspirin use is known to damage the gastric mucosal barrier and increase the  
19  
20 risk of erosions, ulcers, and bleeding by way of inhibiting cyclooxygenase-1 enzyme  
21  
22 activity [20]. Several meta-analyses have indicated that aspirin's efficacy in primary  
23  
24 prevention of cardiovascular disease needs to be weighed against any increase in major  
25  
26 bleeding [21-23]; (ii) attributable to adverse effects of causing asthma and dyspnea,  
27  
28 aspirin is likely to cause CAS and increase the occurrence of MACE or cardiogenic  
29  
30 death [24-25]; (iii) the synthesis of prostacyclin, a well-known vasodilator released by  
31  
32 endothelial cells is inhibited by aspirin [26] and CAS induced by aspirin, which could,  
33  
34 in turn, cause recurrent angina leading to rehospitalization, myocardial infarction, and  
35  
36 cardiac death.  
37  
38  
39  
40  
41  
42  
43  
44  
45  
46  
47  
48

49 In addition, aspirin use has been found in this analysis to have a possible  
50  
51 protective effect on MI. The pharmacological mechanism easily explains the aspirin's  
52  
53 beneficial effects on MI. But there is great heterogeneity, which may be attributable to  
54  
55 the lack of related studies and a different definition of myocardial infarction by Mori  
56  
57 in his study[14]. Aspirin use in CAS patients is both advantageous as well as  
58  
59  
60

1  
2  
3  
4 disadvantageous. Further investigations are necessary for the analysis of beneficial  
5  
6 effects to determine whether to recommend.  
7  
8  
9

10 Several potential limitations should also be considered in the case of this  
11  
12 meta-analysis. First, MACE and MI have been defined differently in the included  
13  
14 articles. Second, in one of the studies by Mori (2020), not aspirin but an antiplatelet  
15  
16 drug comprising aspirin and P2Y12 inhibitors have been used as the therapeutic drug.  
17  
18 Third, the sample size in the included studies is too small; only a few studies have  
19  
20 conducted propensity matching analysis to balance baseline characteristics. The  
21  
22 limitations inherent to multicenter observational studies performed in both  
23  
24 retrospective and prospective manners could not be avoided in this analysis. Finally,  
25  
26 the major bleeding outcome was excluded from this study, which is essential for  
27  
28 understanding the advantages of antiplatelet therapy. Considering that this study  
29  
30 evaluated the prognosis of VSA patients using low-dose aspirin is the first of its kind,  
31  
32 it has its merits.  
33  
34  
35  
36  
37  
38  
39  
40  
41

## 42 **CONCLUSIONS**

43  
44  
45 Aspirin use may not lessen cardiovascular events among VSA patients without  
46  
47 significant stenosis. Owing to its potential adverse effects, regular use of aspirin in  
48  
49 VSA patients without significant stenosis is best avoided.  
50  
51

## 52 **Acknowledgments**

53  
54  
55  
56 None  
57  
58

## 59 **Contributors**

1  
2  
3 YW, YC and YJ conceived, designed and led the study. YW, YJ, SH, XL and QL  
4  
5 investigated, conducted the study and collected data. YW, YJ and YC wrote, revised  
6  
7 and edited the manuscript. All authors supervised the study and approved of the final  
8  
9 version submitted.  
10  
11  
12

### 13 **Funding**

14  
15  
16 This study was supported by a grant from the Shenzhen Key Medical Discipline  
17  
18 Construction Fund (no. SZXK059) and Shenzhen Foundation (SZLY2017025 and  
19  
20 JCYJ20170307100512856).  
21  
22

### 23 **Conflict of interest**

24  
25 No conflict of interest  
26  
27  
28  
29

### 30 **Patient consent for publication**

31  
32 Not required  
33  
34  
35

### 36 **Provenance and peer review**

37  
38 Not commissioned; externally peer reviewed.  
39  
40  
41  
42

### 43 **Data availability statement**

44  
45 Data are available upon reasonable request. Data are available upon request.  
46  
47  
48

### 49 **ORCID iD**

50  
51 Yaowang Lin: <https://orcid.org/0000-0002-4075-4259>  
52  
53  
54  
55  
56  
57  
58  
59  
60

## References

1. Montone RA, Niccoli G, Fracassi F, et al. Patients with acute myocardial infarction and non-obstructive coronary arteries: safety and prognostic relevance of invasive coronary provocative tests. *Eur Heart J*. 2018; 39(2): 91-8.
2. Kunadian V, Chieffo A, Camici PG, et al. An EAPCI Expert Consensus Document on Ischaemia with Non-Obstructive Coronary Arteries in Collaboration with European Society of Cardiology Working Group on Coronary Pathophysiology & Microcirculation Endorsed by Coronary Vasomotor Disorders International Study Group. *Eur Heart J*. 2020; 41(37): 3504-20.
3. Lee BK, Lim HS, Fearon WF, et al. Invasive evaluation of patients with angina in the absence of obstructive coronary artery disease. *Circulation*. 2015; 131(12): 1054-60.
4. Khuddus MA, Pepine CJ, Handberg EM, et al. An intravascular ultrasound analysis in women experiencing chest pain in the absence of obstructive coronary artery disease: a substudy from the National Heart, Lung and Blood Institute-Sponsored Women's Ischemia Syndrome Evaluation (WISE). *J Interv Cardiol*. 2010; 23(6): 511-9.
5. Knuuti J, Wijns W, Saraste A, et al. 2019 ESC Guidelines for the diagnosis and management of chronic coronary syndromes. *Eur Heart J*. 2020; 41(3): 407-77.



- 1  
2  
3  
4 6. Collet JP, Thiele H, Barbato E, et al. 2020 ESC Guidelines for the management  
5  
6 of acute coronary syndromes in patients presenting without persistent ST-segment  
7  
8 elevation. *Eur Heart J*. 2020.
- 9  
10  
11  
12 7. Guirguis-Blake JM, Evans CV, Senger CA, O'Connor EA, Whitlock EP. Aspirin  
13  
14 for the Primary Prevention of Cardiovascular Events: A Systematic Evidence Review  
15  
16 for the U.S. Preventive Services Task Force. *Ann Intern Med*. 2016; 164(12): 804-13.
- 17  
18  
19  
20 8. Zheng SL, Roddick AJ. Association of Aspirin Use for Primary Prevention With  
21  
22 Cardiovascular Events and Bleeding Events: A Systematic Review and  
23  
24 Meta-analysis. *Jama*. 2019; 321(3): 277-87.
- 25  
26  
27  
28 9. Lee Y, Park HC, Shin J. Clinical efficacy of aspirin with identification of intimal  
29  
30 morphology by optical coherence tomography in preventing event recurrence in  
31  
32 patients with vasospasm-induced acute coronary syndrome. *Int J Cardiovasc Imaging*.  
33  
34 2018; 34(11): 1697-706.
- 35  
36  
37  
38 10. Kim MC, Ahn Y, Park KH, et al. Clinical outcomes of low-dose aspirin  
39  
40 administration in patients with variant angina pectoris. *Int J Cardiol*. 2013; 167(5):  
41  
42 2333-4.
- 43  
44  
45  
46 11. Lim AY, Park TK, Cho SW, et al. Clinical implications of low-dose aspirin on  
47  
48 vasospastic angina patients without significant coronary artery stenosis; a propensity  
49  
50 score-matched analysis. *Int J Cardiol*. 2016; 221: 161-6.
- 51  
52  
53  
54  
55  
56  
57  
58 12. Ishii M, Kaikita K, Sato K, et al. Impact of aspirin on the prognosis in patients  
59  
60

1  
2  
3  
4 with coronary spasm without significant atherosclerotic stenosis. *Int J Cardiol.* 2016;  
5  
6 220: 328-32.  
7

8  
9  
10 13. Cho SS, Jo SH, Han SH, et al. Clopidogrel plus Aspirin Use is Associated with  
11  
12 Worse Long-Term Outcomes, but Aspirin Use Alone is Safe in Patients with  
13  
14 Vasospastic Angina: Results from the VA-Korea Registry, A Prospective  
15  
16 Multi-Center Cohort. *Sci Rep.* 2019; 9(1): 17783.  
17

18  
19  
20 14. Mori H, Takahashi J, Sato K, et al. The impact of antiplatelet therapy on patients  
21  
22 with vasospastic angina: A multicenter registry study of the Japanese Coronary Spasm  
23  
24 Association. *Int J Cardiol Heart Vasc.* 2020; 29: 100561.  
25  
26

27  
28  
29 15. Yasue H, Mizuno Y, Harada E. Coronary artery spasm - Clinical features,  
30  
31 pathogenesis and treatment. *Proc Jpn Acad Ser B Phys Biol Sci.* 2019; 95(2): 53-66.  
32  
33

34  
35  
36 16. Capodanno D, Alfonso F, Levine GN, Valgimigli M, Angiolillo DJ. ACC/AHA  
37  
38 Versus ESC Guidelines on Dual Antiplatelet Therapy: JACC Guideline Comparison.  
39  
40 *J Am Coll Cardiol.* 2018; 72(23 Pt A): 2915-31.  
41  
42

43  
44  
45 17. Valgimigli M, Bueno H, Byrne RA, et al. 2017 ESC focused update on dual  
46  
47 antiplatelet therapy in coronary artery disease developed in collaboration with  
48  
49 EACTS: The Task Force for dual antiplatelet therapy in coronary artery disease of the  
50  
51 European Society of Cardiology (ESC) and of the European Association for  
52  
53 Cardio-Thoracic Surgery (EACTS). *Eur Heart J.* 2018; 39(3): 213-60.  
54  
55  
56

57  
58 18. Picard F, Sayah N, Spagnoli V, Adjedj J, Varenne O. Vasospastic angina: A  
59  
60

- 1  
2  
3  
4 literature review of current evidence. *Arch Cardiovasc Dis.* 2019; 112(1): 44-55.  
5  
6  
7  
8 19. Miwa K, Kambara H, Kawai C. Effect of aspirin in large doses on attacks of  
9  
10 variant angina. *Am Heart J.* 1983; 105(2): 351-5.  
11  
12  
13 20. Iwamoto J, Saito Y, Honda A, Matsuzaki Y. Clinical features of gastroduodenal  
14  
15 injury associated with long-term low-dose aspirin therapy. *World J Gastroenterol.*  
16  
17 2013; 19(11): 1673-82.  
18  
19  
20 21. Antithrombotic Trialists C, Baigent C, Blackwell L, et al. Aspirin in the primary  
22  
23 and secondary prevention of vascular disease: collaborative meta-analysis of  
24  
25 individual participant data from randomised trials. *Lancet.* 2009; 373(9678): 1849-60.  
26  
27  
28  
29 22. Xie W, Luo Y, Liang X, Lin Z, Wang Z, Liu M. The Efficacy And Safety Of  
30  
31 Aspirin As The Primary Prevention Of Cardiovascular Disease: An Updated  
32  
33 Meta-Analysis. *Ther Clin Risk Manag.* 2019; 15: 1129-40.  
34  
35  
36  
37 23. Whitlock EP, Burda BU, Williams SB, Guirguis-Blake JM, Evans CV. Bleeding  
38  
39 Risks With Aspirin Use for Primary Prevention in Adults: A Systematic Review for  
40  
41 the U.S. Preventive Services Task Force. *Ann Intern Med.* 2016; 164(12): 826-35.  
42  
43  
44  
45 24. Hangouche AJE, Lamliki O, Oukerraj L, et al. Kounis syndrome induced by oral  
46  
47 intake of aspirin: case report and literature review. *Pan Afr Med J.* 2018; 30: 301.  
48  
49  
50  
51 25. Shah NH, Schneider TR, DeFaria Yeh D, Cahill KN, Laidlaw TM.  
52  
53 Eosinophilia-Associated Coronary Artery Vasospasm in Patients with  
54  
55 Aspirin-Exacerbated Respiratory Disease. *J Allergy Clin Immunol Pract.* 2016; 4(6):  
56  
57  
58  
59  
60

1  
2  
3  
4 1215-9.  
5  
6

7 26. Bates ER, Lau WC. Controversies in antiplatelet therapy for patients with  
8 cardiovascular disease. *Circulation*. 2005; 111(17): e267-71.  
9  
10  
11  
12  
13  
14  
15  
16  
17  
18  
19  
20  
21  
22  
23  
24  
25  
26  
27  
28  
29  
30  
31  
32  
33

34 Figure 1. Flow diagram fo identification process  
35  
36

37 Figure 2. Aspirin use is not associated with low incidence of MACE in patients with  
38 VSA.  
39  
40  
41  
42

43 Figure 3. Subgroub analysis of MACE of aspirin use in patients with VSA.  
44  
45

46 Figure 4. Secondary endpiont including myocardial infarction, cardiac death and all  
47 cause death during 1 to 5 years of follow-up.  
48  
49  
50

51 Figure 5. Assess of bias risk of the studies.  
52  
53  
54  
55  
56  
57  
58  
59  
60

1  
2  
3  
4  
5  
6  
7  
8  
9  
10  
11  
12  
13  
14  
15  
16  
17  
18  
19  
20  
21  
22  
23  
24  
25  
26  
27  
28  
29  
30  
31  
32  
33  
34  
35  
36  
37  
38  
39  
40  
41  
42  
43  
44  
45  
46  
47  
48  
49  
50  
51  
52  
53  
54  
55  
56  
57  
58  
59  
60

For peer review only

**Table 1. Baseline characteristics of included studies.**

| Study          | Year | Design                                                    | Participants                         | Total aspirin | Without aspirin | Dosage of aspirin (mg) | MACE definition | MACE                                                                                                         | Myocardial infarction    | Cardiac death       | All cause death            | Follow-up            |        |
|----------------|------|-----------------------------------------------------------|--------------------------------------|---------------|-----------------|------------------------|-----------------|--------------------------------------------------------------------------------------------------------------|--------------------------|---------------------|----------------------------|----------------------|--------|
| Min Chul Kim   | 2013 | Retrospective analysis                                    | Vasospastic angina (stenosis≤50%)    | 240           | 96              | 144                    | 100             | Readmission rate associated with recurrent angina, cardiac death, percutaneous coronary intervention         | 20 (20.8) vs. 29 (20.1)  | /                   | 1 (1.0) vs. 1 (0.7)        | /                    | 1-year |
| Masanobu Ishii | 2016 | Retrospective analysis, propensity score matched analysis | Vasospastic angina (stenosis≤50%)    | 224           | 112             | 112                    | 81–100          | Cardiac death, nonfatal acute myocardial infarction, and unstable angina                                     | 4 (3.6) vs. 6 (5.4)      | 0 vs. 0             | 2 (1.8) vs. 0 (0)          | /                    | 1-year |
| A.Young Lim    | 2016 | Retrospective analysis, propensity score matched analysis | Coronary artery spasm (stenosis≤50%) | 721           | 434             | 287                    | 100             | Cardiac death, acute myocardial infarction, revascularization, or rehospitalization due to recurrent angina. | 100 (23.0) vs. 34 (11.8) | 9 (2.1) vs. 2 (0.7) | 4 (0.9) vs. 3 (1.0), p=0.5 | 10 (2.2) vs. 9 (1.5) | 5-year |
| Yonggu Lee     | 2018 | Retrospective study, propensity score-matched             | Coronary artery spasm                | 154           | 77              | 77                     | 100             | Chest pain recurrence, myocardial infarction, cardiac                                                        | 9 (11.7) vs. 33          | 2 (3) vs. 13 (17)   | 0 vs. 0                    | 0 vs. 0              | 4-year |

1  
2  
3  
4  
5  
6  
7  
8  
9  
10  
11  
12  
13  
14  
15  
16  
17  
18  
19  
20  
21  
22  
23  
24  
25  
26  
27  
28  
29  
30  
31  
32  
33  
34  
35  
36  
37  
38  
39  
40  
41  
42  
43  
44  
45  
46

|                   |          |                                                                 |                                            |      |     |      |                                         |                                                                                                                                                      |                             |                        |                        |                        |           |
|-------------------|----------|-----------------------------------------------------------------|--------------------------------------------|------|-----|------|-----------------------------------------|------------------------------------------------------------------------------------------------------------------------------------------------------|-----------------------------|------------------------|------------------------|------------------------|-----------|
|                   | analysis | (stenosis≤50%)                                                  |                                            |      |     |      | death                                   | (42.9)                                                                                                                                               |                             |                        |                        |                        |           |
| Seong-Sik<br>cho  | 2019     | Prospective<br>multicenter cohort                               | Coronary artery<br>spasm<br>(stenosis≤50%) | 1652 | 641 | 1011 | 100                                     | all cause death, acute coronary<br>syndrome, and symptomatic<br>arrhythmia                                                                           | 29 (4.5)<br>vs.<br>44(4.4)  | /                      | /                      | 3 (0.5) vs.<br>7(0.7)  | 3-year    |
| Hiroyoshi<br>Mori | 2020     | Retrospective study,<br>propensity<br>score-matched<br>analysis | Coronary artery<br>spasm<br>(stenosis≤50%) | 670  | 335 | 335  | Aspirin 100<br>and P2Y12<br>inhibitors. | cardiac death, nonfatal<br>myocardial infarction,<br>hospitalization due to unstable<br>angina pectoris, heart failure,<br>and appropriate ICD shock | 19 (5.7)<br>vs. 12<br>(3.6) | 1 (0.3) vs. 2<br>(0.6) | 2 (0.6) vs. 0<br>(0.0) | 2 (0.6)<br>vs. 6 (1.8) | 32-months |

1  
2  
3  
4  
5  
6  
7  
8  
9  
10  
11  
12  
13  
14  
15  
16  
17  
18  
19  
20  
21  
22  
23  
24  
25  
26  
27  
28  
29  
30  
31  
32  
33  
34  
35  
36  
37  
38  
39  
40  
41  
42  
43  
44  
45  
46

For peer review only

**Table 2. Clinical characteristics of patients in included studies.**



1  
2  
3  
4  
5  
6  
7  
8  
9  
10  
11  
12  
13  
14  
15  
16  
17  
18  
19  
20  
21  
22  
23  
24  
25  
26  
27  
28  
29  
30  
31  
32  
33  
34  
35  
36  
37  
38  
39  
40  
41  
42  
43  
44  
45  
46

| Characteristics            | Min Chul Kim | Masanobu Ishii                          | A. Young Lim                           | Yonggu Lee                         | Seong-Sik cho                           | Hiroyoshi Mori                            |
|----------------------------|--------------|-----------------------------------------|----------------------------------------|------------------------------------|-----------------------------------------|-------------------------------------------|
| aspirin vs. no             | 2013         | 2016                                    | 2016                                   | 2018                               | 2019                                    | 2020                                      |
| Age<br>(year)              | /            | 66.0 ± 9.5 vs. 67.0 ± 8.4,<br>p = 0.428 | 49.0–62.0 vs. 49.0–62.5,<br>p = 0.61   | 51.3±6.7 vs. 50.8±7.5,<br>p = 0.70 | 57.2±11.2 vs. 53.5±11.3,<br>p = 0.001   | 65.4 ± 9.9 vs. 66.7± 10.3,<br>p = 0.07    |
| Males,<br>n (%)            | /            | 47 (42.0) vs. 47 (42.0),<br>p = 1.000   | 359 (82.7) vs. 243 (84.7),<br>p = 0.49 | 60 (78) vs. 55 (71),<br>p = 0.354  | 412 (64.3) vs. 590 (58.4),<br>p = 0.055 | 247 (73.7%) vs. 253 (75.5%) ,<br>p = 0.66 |
| Hypertension,<br>n (%)     | /            | 52 (46.4) vs. 57 (50.9),<br>p = 0.504   | 156 (36.0) vs. 104 (36.2),<br>p = 0.96 | 22 (29) vs. 20 (26),<br>p = 0.717  | 294 (45.9) vs. 320 (31.7),<br>p = 0.001 | 158 (47.2%) vs. 166 (49.6%) ,<br>p = 0.59 |
| Diabete mellitus,<br>n (%) | /            | 26 (23.2) vs. 27 (24.1),<br>p = 0.875   | 98 (22.6) vs. 66 (23.0),<br>p = 0.91   | 17 (22) vs. 16 (19),<br>p = 0.547  | 73 (11.4) vs. 83(8.2),<br>p = 0.037     | 56 (16.7%) vs. 56 (16.7%),<br>p = 1.00    |
| Smoking,<br>n (%)          | /            | 59 (52.7) vs. 52 (46.4),<br>p = 0.350   | 127 (29.3) vs. 87 (30.3),<br>p = 0.78  | 55 (71) vs. 57 (74),<br>p = 0.717  | 183 (28.9) vs. 250(24.7),<br>p = 0.005  | 202 (60.3%) vs. 202 (60.3%),<br>p = 1.00  |
| Dyslipidemia,<br>n (%)     | /            | 62 (55.4) vs. 60 (53.6) ,<br>p = 0.788  | 91 (21.0) vs. 62 (21.6),<br>p = 0.84   | /                                  | 98 (15.4) vs.160(15.8) ,<br>p = 0.800   | 156 (46.6%) vs. 142 (42.4%) ,<br>p = 0.31 |

|                     |   |                             |                             |                      |                            |                              |
|---------------------|---|-----------------------------|-----------------------------|----------------------|----------------------------|------------------------------|
| Ca channel blocker, | / | 104 (92.9) vs. 101 (90.2) , | 420 (96.9) vs. 275 (95.8),  | 50 (65) vs. 48 (62), | 152 (24.2) vs. 162(16.12), | 316 (94.3%) vs. 313 (93.4%), |
| n (%)               |   | p = 0.472                   | p = 0.46                    | p = 0.738            | p = 0.001                  | p = 0.75                     |
| Statin,             | / | 38 (33.9) vs. 40 (35.7),    | 182 (42.0) vs. 113 (39.4) , | /                    | 123 (19.7) vs. 119(11.9),  | 103 (30.7%) vs. 95 (28.4%),  |
| n (%)               |   | p = 0.779                   | p = 0.49                    |                      | p = 0.001                  | p = 0.55                     |
| ACEI / ARB,         | / | 33(29.5) vs. 25 (22.3),     | 69 (15.9) vs. 43 (15.0) ,   | /                    | 152 (24.3) vs.126(12.6),   | 73 (21.8%) vs. 71 (21.2%) ,  |
| n (%)               |   | p = 0.288                   | p = 0.74                    |                      | p = 0.001                  | p = 0.93                     |
| Beta-blocker,       | / | 6 (5.4) vs. 7 (6.3),        | 1 (0.2) vs. 0 (0.0),        | 17 (22) vs. 23 (30), | 54 (8.65) vs. 59(5.88),    | /                            |
| n (%)               |   | p = 0.775                   | p = 0.48                    | p = 0.270            | p = 0.065                  |                              |

ACEI / ARB = angiotensin-converting enzyme inhibitor / angiotensin receptor blocker

1  
2  
3  
4  
5  
6  
7  
8  
9  
10  
11  
12  
13  
14  
15  
16  
17  
18  
19  
20  
21  
22  
23  
24  
25  
26  
27  
28  
29  
30  
31  
32  
33  
34  
35  
36  
37  
38  
39  
40  
41  
42  
43  
44  
45  
46

For peer review only

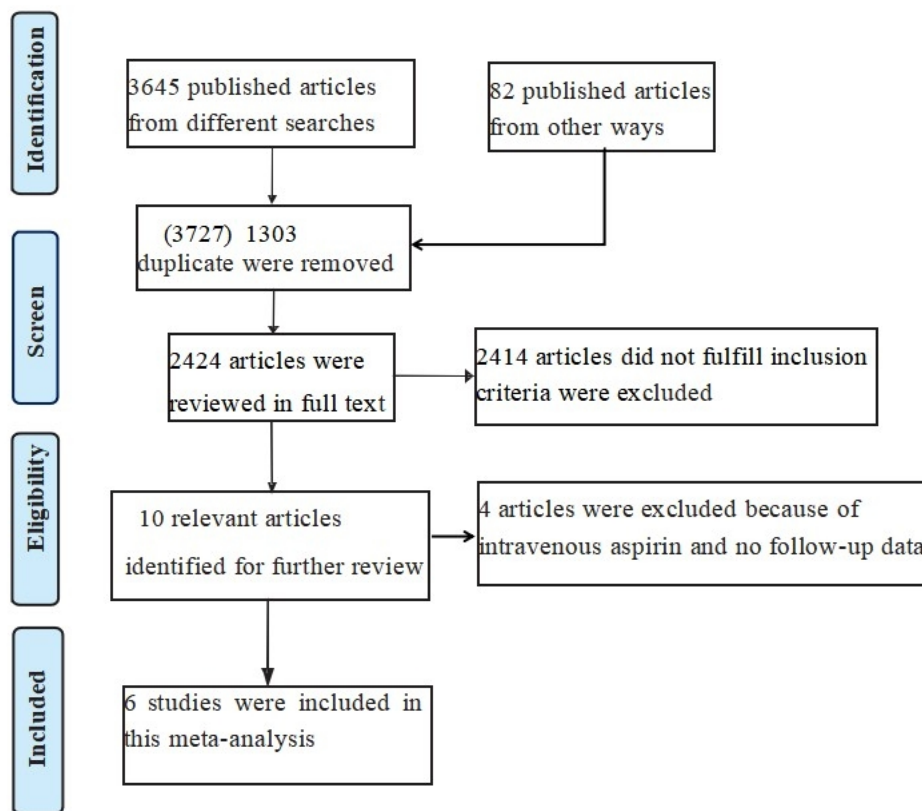

Figure 1. Flow diagram for identification process

132x119mm (144 x 144 DPI)

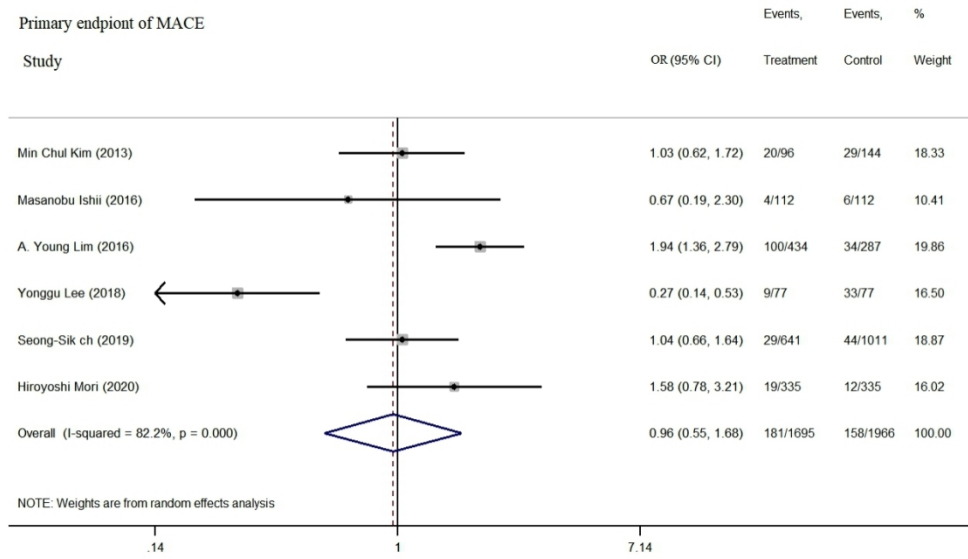

Figure 2. Aspirin use is not associated with low incidence of MACE in patients with VSA.

231x135mm (144 x 144 DPI)

1  
2  
3  
4  
5  
6  
7  
8  
9  
10  
11  
12  
13  
14  
15  
16  
17  
18  
19  
20  
21  
22  
23  
24  
25  
26  
27  
28  
29  
30  
31  
32  
33  
34  
35  
36  
37  
38  
39  
40  
41  
42  
43  
44  
45  
46  
47  
48  
49  
50  
51  
52  
53  
54  
55  
56  
57  
58  
59  
60

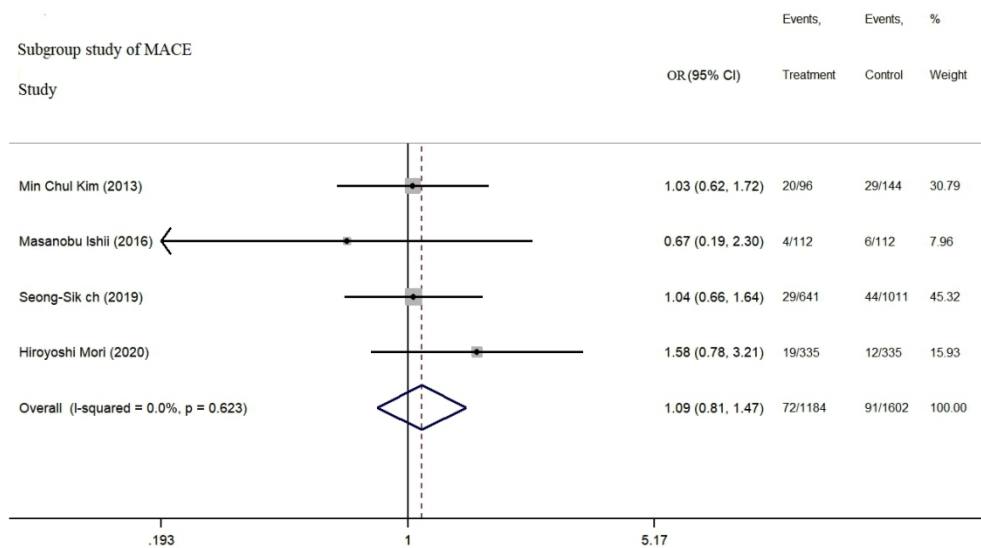

Figure 3. Subgroup analysis of MACE of aspirin use in patients with VSA.

233x136mm (144 x 144 DPI)

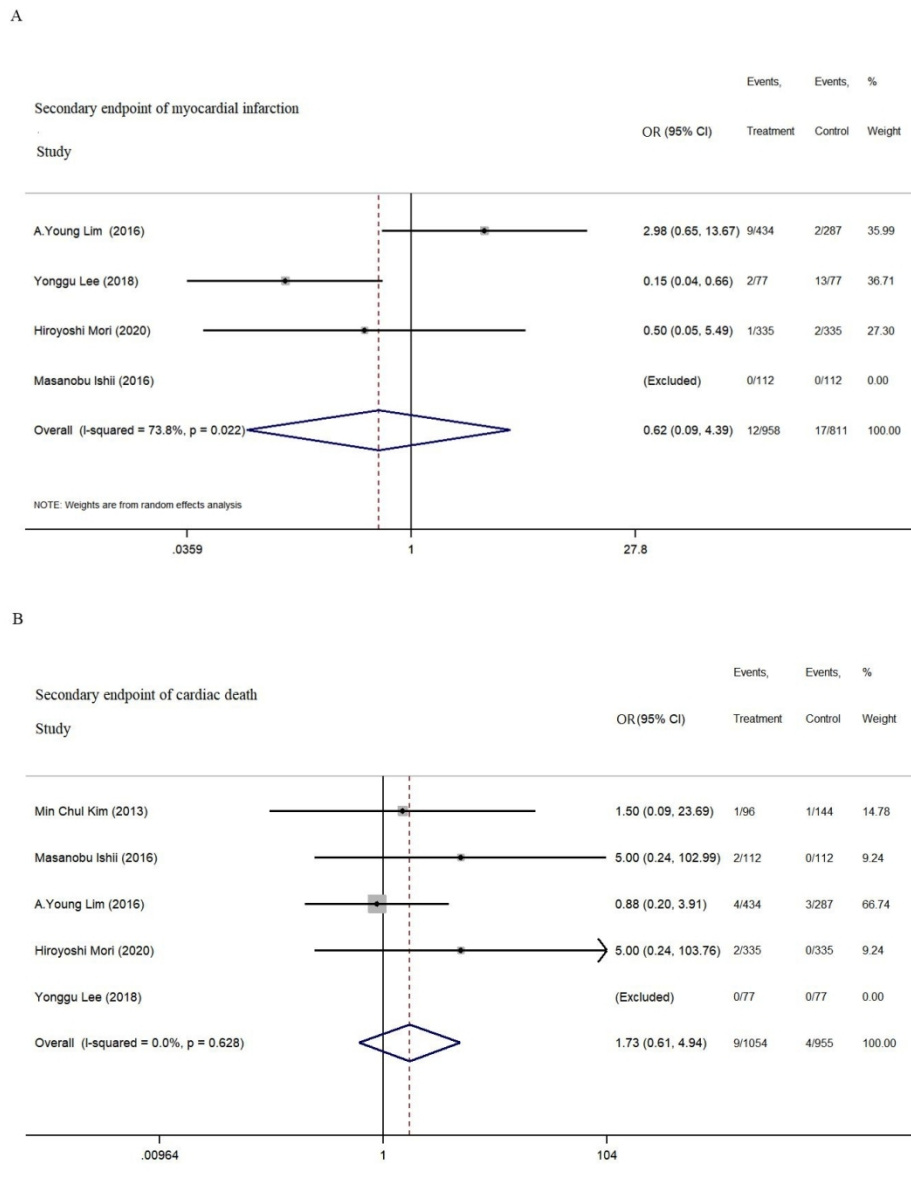

Figure 4. Secondary endpoint including myocardial infarction, cardiac death and all cause death during 1 to 5 years of follow-up.

240x305mm (144 x 144 DPI)

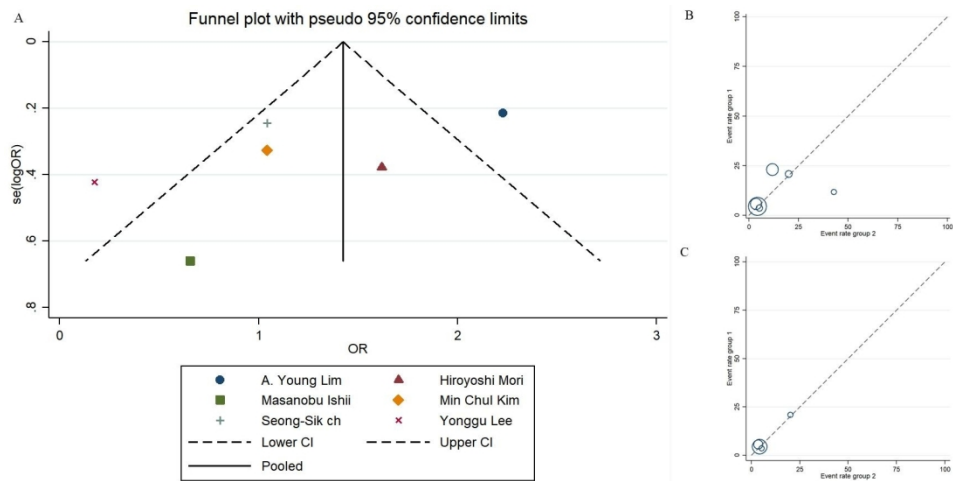

Figure 5. Assess of bias risk of the studies.

477x231mm (96 x 96 DPI)



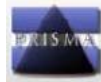

# PRISMA 2009 Checklist

| Section/topic                      | #  | Checklist item                                                                                                                                                                                                                                                                                              | Reported on page # |
|------------------------------------|----|-------------------------------------------------------------------------------------------------------------------------------------------------------------------------------------------------------------------------------------------------------------------------------------------------------------|--------------------|
| <b>TITLE</b>                       |    |                                                                                                                                                                                                                                                                                                             |                    |
| Title                              | 1  | Identify the report as a systematic review, meta-analysis, or both.                                                                                                                                                                                                                                         | Page 1             |
| <b>ABSTRACT</b>                    |    |                                                                                                                                                                                                                                                                                                             |                    |
| Structured summary                 | 2  | Provide a structured summary including, as applicable: background; objectives; data sources; study eligibility criteria, participants, and interventions; study appraisal and synthesis methods; results; limitations; conclusions and implications of key findings; systematic review registration number. | Page 2             |
| <b>INTRODUCTION</b>                |    |                                                                                                                                                                                                                                                                                                             |                    |
| Rationale                          | 3  | Describe the rationale for the review in the context of what is already known.                                                                                                                                                                                                                              | Page 4             |
| Objectives                         | 4  | Provide an explicit statement of questions being addressed with reference to participants, interventions, comparisons, outcomes, and study design (PICOS).                                                                                                                                                  | Page 4             |
| <b>METHODS</b>                     |    |                                                                                                                                                                                                                                                                                                             |                    |
| Protocol and registration          | 5  | Indicate if a review protocol exists, if and where it can be accessed (e.g., Web address), and, if available, provide registration information including registration number.                                                                                                                               | Page 4-5           |
| Eligibility criteria               | 6  | Specify study characteristics (e.g., PICOS, length of follow-up) and report characteristics (e.g., years considered, language, publication status) used as criteria for eligibility, giving rationale.                                                                                                      | Page 4-5           |
| Information sources                | 7  | Describe all information sources (e.g., databases with dates of coverage, contact with study authors to identify additional studies) in the search and date last searched.                                                                                                                                  | Page 4-5           |
| Search                             | 8  | Present full electronic search strategy for at least one database, including any limits used, such that it could be repeated.                                                                                                                                                                               | Page 4-5           |
| Study selection                    | 9  | State the process for selecting studies (i.e., screening, eligibility, included in systematic review, and, if applicable, included in the meta-analysis).                                                                                                                                                   | Page 4-5           |
| Data collection process            | 10 | Describe method of data extraction from reports (e.g., piloted forms, independently, in duplicate) and any processes for obtaining and confirming data from investigators.                                                                                                                                  | Page 4-5           |
| Data items                         | 11 | List and define all variables for which data were sought (e.g., PICOS, funding sources) and any assumptions and simplifications made.                                                                                                                                                                       | Page 4-5           |
| Risk of bias in individual studies | 12 | Describe methods used for assessing risk of bias of individual studies (including specification of whether this was done at the study or outcome level), and how this information is to be used in any data synthesis.                                                                                      | Page 4-5           |
| Summary measures                   | 13 | State the principal summary measures (e.g., risk ratio, difference in means).                                                                                                                                                                                                                               | Page 4-5           |
| Synthesis of results               | 14 | Describe the methods of handling data and combining results of studies, if done, including measures of consistency (e.g., $I^2$ ) for each meta-analysis.                                                                                                                                                   | Page 4-5           |

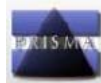

# PRISMA 2009 Checklist

Page 1 of 2

| Section/topic                 | #  | Checklist item                                                                                                                                                                                           | Reported on page # |
|-------------------------------|----|----------------------------------------------------------------------------------------------------------------------------------------------------------------------------------------------------------|--------------------|
| Risk of bias across studies   | 15 | Specify any assessment of risk of bias that may affect the cumulative evidence (e.g., publication bias, selective reporting within studies).                                                             | Page 4-5           |
| Additional analyses           | 16 | Describe methods of additional analyses (e.g., sensitivity or subgroup analyses, meta-regression), if done, indicating which were pre-specified.                                                         | Page 5             |
| <b>RESULTS</b>                |    |                                                                                                                                                                                                          |                    |
| Study selection               | 17 | Give numbers of studies screened, assessed for eligibility, and included in the review, with reasons for exclusions at each stage, ideally with a flow diagram.                                          | Page 6-7           |
| Study characteristics         | 18 | For each study, present characteristics for which data were extracted (e.g., study size, PICOS, follow-up period) and provide the citations.                                                             | Page 6-7           |
| Risk of bias within studies   | 19 | Present data on risk of bias of each study and, if available, any outcome level assessment (see item 12).                                                                                                | Page 6-7           |
| Results of individual studies | 20 | For all outcomes considered (benefits or harms), present, for each study: (a) simple summary data for each intervention group (b) effect estimates and confidence intervals, ideally with a forest plot. | Page 6-7           |
| Synthesis of results          | 21 | Present results of each meta-analysis done, including confidence intervals and measures of consistency.                                                                                                  | Page 6-7           |
| Risk of bias across studies   | 22 | Present results of any assessment of risk of bias across studies (see Item 15).                                                                                                                          | Page 6-7           |
| Additional analysis           | 23 | Give results of additional analyses, if done (e.g., sensitivity or subgroup analyses, meta-regression [see Item 16]).                                                                                    | Page 6-7           |
| <b>DISCUSSION</b>             |    |                                                                                                                                                                                                          |                    |
| Summary of evidence           | 24 | Summarize the main findings including the strength of evidence for each main outcome; consider their relevance to key groups (e.g., healthcare providers, users, and policy makers).                     | Page 7-10          |
| Limitations                   | 25 | Discuss limitations at study and outcome level (e.g., risk of bias), and at review-level (e.g., incomplete retrieval of identified research, reporting bias).                                            | Page 10            |
| Conclusions                   | 26 | Provide a general interpretation of the results in the context of other evidence, and implications for future research.                                                                                  | Page 10            |
| <b>FUNDING</b>                |    |                                                                                                                                                                                                          |                    |
| Funding                       | 27 | Describe sources of funding for the systematic review and other support (e.g., supply of data); role of funders for the systematic review.                                                               | Page 11            |

From: Moher D, Liberati A, Tetzlaff J, Altman DG, The PRISMA Group (2009). Preferred Reporting Items for Systematic Reviews and Meta-Analyses: The PRISMA Statement. PLoS Med 6(6): e1000097. doi:10.1371/journal.pmed1000097

For peer review only, <http://bmjopen.bmj.com/site/about/guidelines.xhtml>  
For more information, visit: [www.prisma-statement.org](http://www.prisma-statement.org)

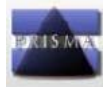

# PRISMA 2009 Checklist

For peer review only

- 1
- 2
- 3
- 4
- 5
- 6
- 7
- 8
- 9
- 10
- 11
- 12
- 13
- 14
- 15
- 16
- 17
- 18
- 19
- 20
- 21
- 22
- 23
- 24
- 25
- 26
- 27
- 28
- 29
- 30
- 31
- 32
- 33
- 34
- 35
- 36
- 37
- 38
- 39
- 40
- 41
- 42
- 43
- 44
- 45
- 46
- 47

# BMJ Open

## Impact of Aspirin Use on Clinical Outcomes in Patients With Vasospastic Angina: A Systematic Review and Meta-analysis

|                                 |                                                                                                                                                                                                                                                                                                                                                                                                                        |
|---------------------------------|------------------------------------------------------------------------------------------------------------------------------------------------------------------------------------------------------------------------------------------------------------------------------------------------------------------------------------------------------------------------------------------------------------------------|
| Journal:                        | <i>BMJ Open</i>                                                                                                                                                                                                                                                                                                                                                                                                        |
| Manuscript ID                   | bmjopen-2021-048719.R1                                                                                                                                                                                                                                                                                                                                                                                                 |
| Article Type:                   | Original research                                                                                                                                                                                                                                                                                                                                                                                                      |
| Date Submitted by the Author:   | 01-Jun-2021                                                                                                                                                                                                                                                                                                                                                                                                            |
| Complete List of Authors:       | lin, yaowang; Shenzhen People's Hospital, Department of Cardiology<br>chen, qiuling; Shenzhen People's Hospital, Department of Pharmacy<br>yuan, jie; Shenzhen People's Hospital, Department of Cardiology<br>dong, shaohong; Shenzhen People's Hospital, Department of Cardiology<br>Qin, Haiyan; Shenzhen People's Hospital, Department of Emergency<br>chen, yang; Guangdong Medical University, School of Pharmacy |
| <b>Primary Subject Heading</b>: | Medical management                                                                                                                                                                                                                                                                                                                                                                                                     |
| Secondary Subject Heading:      | Cardiovascular medicine                                                                                                                                                                                                                                                                                                                                                                                                |
| Keywords:                       | Coronary heart disease < CARDIOLOGY, Myocardial infarction < CARDIOLOGY, Vascular medicine < INTERNAL MEDICINE                                                                                                                                                                                                                                                                                                         |
|                                 |                                                                                                                                                                                                                                                                                                                                                                                                                        |

SCHOLARONE™  
Manuscripts

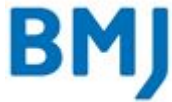

I, the Submitting Author has the right to grant and does grant on behalf of all authors of the Work (as defined in the below author licence), an exclusive licence and/or a non-exclusive licence for contributions from authors who are: i) UK Crown employees; ii) where BMJ has agreed a CC-BY licence shall apply, and/or iii) in accordance with the terms applicable for US Federal Government officers or employees acting as part of their official duties; on a worldwide, perpetual, irrevocable, royalty-free basis to BMJ Publishing Group Ltd ("BMJ") its licensees and where the relevant Journal is co-owned by BMJ to the co-owners of the Journal, to publish the Work in this journal and any other BMJ products and to exploit all rights, as set out in our [licence](#).

The Submitting Author accepts and understands that any supply made under these terms is made by BMJ to the Submitting Author unless you are acting as an employee on behalf of your employer or a postgraduate student of an affiliated institution which is paying any applicable article publishing charge ("APC") for Open Access articles. Where the Submitting Author wishes to make the Work available on an Open Access basis (and intends to pay the relevant APC), the terms of reuse of such Open Access shall be governed by a Creative Commons licence – details of these licences and which [Creative Commons](#) licence will apply to this Work are set out in our licence referred to above.

Other than as permitted in any relevant BMJ Author's Self Archiving Policies, I confirm this Work has not been accepted for publication elsewhere, is not being considered for publication elsewhere and does not duplicate material already published. I confirm all authors consent to publication of this Work and authorise the granting of this licence.

## **Impact of Aspirin Use on Clinical Outcomes in Patients with Vasospastic**

### **Angina: A Systematic Review and Meta-analysis**

Yaowang Lin<sup>1,4</sup>, MD; Qiuling Chen<sup>3,4</sup>, MD; Jie Yuan<sup>1,4</sup>, MD; Shaohong Dong<sup>1,4</sup>, MD; Haiyan Qin<sup>2,4</sup>, MD; Yang Chen<sup>5</sup>, MD

#### **Author's Affiliation:**

<sup>1</sup>Department of Cardiology; <sup>2</sup>Department of Health Management; <sup>3</sup>Department of Pharmacy; <sup>4</sup>Shenzhen People's Hospital, Second Clinical Medical College of Jinan University, first affiliated Hospital of South University of Science and Technology, Shenzhen, Guangdong. No. 1017, Dongmen Northern Road, 518020, Shenzhen, Guangdong, PR China. <sup>5</sup>School of Pharmacy, Guangdong Medical University, Dongguan 523808, Guangdong, China

#### **Correspondence should be addressed to Haiyan Qin and Yang Chen**

Haiyan Qin, MD, e-mail: [lgqinhaiyan@yeah.net](mailto:lgqinhaiyan@yeah.net) and Yang Chen, MD, e-mail: [ychan227@163.com](mailto:ychan227@163.com).

## ABSTRACT

**Objectives:** The use of aspirin to prevent cardiovascular disease in vasospastic angina (VSA) patients without significant stenosis is yet to be investigated. The efficacy of aspirin use among VSA patients has been investigated in this study.

**Design:** Systematic review and meta-analysis.

**Data sources:** PubMed, web of science, and Cochrane Central Register of Controlled Trials were searched for relevant information prior to October 2020.

**Eligibility criteria for selecting studies:** Aspirin use against no aspirin (placebo or no treatment) among VSA patients in the absence of significant stenosis.

**Data extraction and synthesis:** Two investigators extracted the study data. Odds ratios (ORs) and the 95% confidence intervals (CI) were calculated and graphed as forest plots. The Newcastle-Ottawa Quality Assessment Scale (NOS) tool and Begg's funnel plot were used to assess risk of bias.

**Results:** Four propensity-matched cohorts, one retrospective analysis, and one prospective multicenter cohort, totally comprising 3661 patients (aspirin use group,  $n = 1,695$ ; no aspirin use group,  $n = 1,966$ ) were included in this meta-analysis. Aspirin use and the incidence of MACE with follow-up of 1–5 years were not found to be significantly correlated (combined odds ratio [OR] = 0.90, 95% confidence interval [CI]: 0.55–1.68,  $p = 0.829$ ,  $I^2 = 82.2\%$ ; subgroup analysis: OR = 1.09, 95% CI: 0.81–1.47,  $I^2 = 0\%$ ). Aspirin use was tended to be linked with lower incidence of myocardial infarction (OR = 0.62, 95% CI: 0.09–4.36,  $p = 0.615$ ,  $I^2 = 73.8\%$ ) and

1  
2  
3  
4 higher incidence of cardiac death (OR = 1.73, 95% CI: 0.61–4.94, p = 0.444,  $I^2 = 0\%$ )  
5  
6 during follow-up, but with no significant difference between-group.  
7  
8

9 **Conclusion:** Aspirin use may be not likely to reduce future cardiovascular events in  
10  
11 VSA patients without significant stenosis.  
12  
13  
14  
15  
16

17 **Trial registration number:** PROSPERO (CRD42020214891)  
18  
19  
20  
21

22 **Keywords:** aspirin, vasospastic angina, MACE, cardiac death, myocardial infarction,  
23  
24 longtime follow-up  
25  
26  
27  
28  
29  
30  
31  
32  
33  
34  
35  
36  
37  
38  
39  
40  
41  
42  
43  
44  
45  
46  
47  
48  
49  
50  
51  
52  
53  
54  
55  
56  
57  
58  
59  
60



#### Strengths and limitations of this study

- ▶ This is the first meta-analysis to evaluate the impact of aspirin use on clinical outcomes in patients with VSA.
- ▶ The therapeutic drug in one of the studies by Mori (2020) is an antiplatelet drug comprising aspirin and P2Y12 inhibitors.
- ▶ The limitations inherent to multicenter observational studies performed in both retrospective and prospective manners could not be avoided in this analysis.
- ▶ The conclusions should be confirmed by further randomized controlled trials with larger sample size.

## INTRODUCTION

Coronary spasm characterized by vasospastic angina (VSA) is one of the causes of ischemia with non-obstructive coronary artery (INOCA) [1, 2]. VSA patients who parallelly suffer from endothelial dysfunction or coronary atherosclerosis commonly use aspirin [3, 4], as per the guidelines of the European Society of Cardiology (ESC) for the management of chronic stable angina and acute coronary syndromes [5, 6].

The ASCEND study has showed the use of low-dose aspirin lead to a lower risk of serious vascular events (8.5% vs. 9.6%;  $p=0.01$ ) than placebo among persons with diabetes in primary treatment, but the absolute benefits are largely counterbalanced by the bleeding hazard (4.1% vs. 3.2%;  $p=0.003$ ) [7]. Additionally, the ARRIVE study has suggested that aspirin use may result in a higher incidence of gastrointestinal bleeding events (0.97% vs. 0.46%;  $p=0.0007$ ) or overall incidence of treatment-related adverse events (16.75% vs. 13.54%;  $p<0.0001$ ) than that with control [8]. Owing to the latest controversy and reduced usage of aspirin in preventing cardiovascular events [9, 10], aspirin's efficiency in VSA patients without significant stenosis has not yet been explained [11-16]. Therefore, this meta-analysis was planned to assess the correlation between aspirin use and cardiovascular events and cardiac death among VSA patients during long-term follow-up.

## MATERIALS AND METHODS

### *Search strategy*

A comprehensive search of related research articles conducted before October 2020 in search engines such as PubMed, web of science, and Cochrane Central Register of

1  
2  
3  
4 Controlled Trials was carried out for gathering data. The keywords were “vasospastic  
5  
6 angina, coronary vasospasms, vasospasm, variant angina, Prinzmetal's variant angina,  
7  
8 spastic coronary angina, coronary artery spasm,” as well as “aspirin, antiplatelet  
9  
10 therapy”. Certain additional related publications, such as review articles and editorials,  
11  
12 were also assessed. This study was registered with PROSPERO (CRD42020214891).  
13  
14  
15

### 16 ***Patient and public involvement***

17  
18 Study participants who met the eligibility criteria as outlined above. All the included  
19  
20 patients were diagnosed with epicardial coronary vasospasms by provocation test.  
21  
22 Participants and other members of public were not involved in the recruitment, design,  
23  
24 conduct, reporting or dissemination plans.  
25  
26  
27  
28

### 29 ***Study selection and data extraction***

30  
31 Following are the inclusion criteria: (i) diagnosed with VSA on provocation test, (ii)  
32  
33 absence of significant stenosis ( $\leq 50\%$ ), (iii) the treatment group was administered  
34  
35 oral aspirin and the control group no aspirin or placebo, and (iv) articles published in  
36  
37 English. The exclusion criteria included significant stenosis ( $\geq 50\%$ ), intravenous  
38  
39 aspirin, case report, and case series. The study data was independently extracted by  
40  
41 two investigators, namely, Lin and Chen, using pre-defined extraction forms and  
42  
43 conflict was resolved by a third reviewer.  
44  
45  
46  
47  
48  
49

### 50 ***Data analysis and risk of bias assessment***

51  
52 Major cardiovascular adverse event (MACE) was the primary endpoint, while  
53  
54 myocardial infarction and cardiac death during follow-up were the secondary  
55  
56 endpoints. MACE has been described as cardiac death, acute coronary syndrome, and  
57  
58  
59  
60

1  
2  
3  
4 hospitalization due to unstable angina, percutaneous coronary intervention,  
5  
6 symptomatic arrhythmia, appropriate implantable cardioverter defibrillator (ICD), and  
7  
8 shock. The Newcastle-Ottawa Quality Assessment Scale (NOS) tool was utilized to  
9  
10 assess the risk of bias and Begg's funnel plot was used to evaluate publication bias.  
11  
12

### 13 ***Statistical analysis***

14  
15  
16 STATA software (version 14.0; StataCorp, College Station, TX, USA) was utilized to  
17  
18 perform the meta-analysis. MACE, the primary endpoint, and myocardial infarction  
19  
20 and cardiac death, the secondary endpoints, were evaluated as combined odds ratios  
21  
22 with 95% confidence intervals (CIs). Heterogeneity between studies was derived with  
23  
24 the help of  $I^2$  statistic. If  $I^2 > 50\%$ , the random effect model was used to assess  
25  
26 heterogeneity, whereas if  $I^2 < 50\%$ , the fixed effect model was utilized to evaluate  
27  
28 heterogeneity. Subgroups were studied to reduce the heterogeneity if  $I^2 > 50\%$ .  $P$   
29  
30 values  $< 0.05$  were considered to be statistically significant.  
31  
32  
33  
34  
35  
36

## 37 **RESULTS**

### 38 ***Characteristics of included studies***

39  
40  
41 Search engines mentioned herein before were scanned to identify about 3,645 related  
42  
43 studies, among which 1,303 articles were duplicated, whereas 2,414 articles did not  
44  
45 fulfill the inclusion criteria and were thus expelled from the study. Therefore, four  
46  
47 propensity-matched cohorts, one retrospective analysis, and one prospective  
48  
49 multicenter cohort (Figure 1), including a total of 3,661 patients (aspirin group,  $n =$   
50  
51 1,695; no aspirin group,  $n = 1,966$ , Table 1) eventually formed part of the study. 4  
52  
53 studies underwent coronary provocation test, except for 1 study (Seong-Sik Cho, 2019)  
54  
55  
56  
57  
58  
59  
60

1  
2  
3  
4 receiving ECG provocation test. All studies provided the primary endpoint, with  
5  
6 follow-up durations ranging from 1 to 5 years (Table 2).  
7

### 8 9 ***Primary and secondary endpoints***

10  
11 No significant correlation was recorded between aspirin use and MACE incidence  
12  
13 with follow-up of 1–5 years (combined odds ratio [OR] = 0.90, 95% confidence  
14  
15 interval [CI]: 0.55–1.68,  $p = 0.829$ ,  $I^2 = 82.2\%$  [Figure 2]; subgroup analysis: OR =  
16  
17 1.09, 95% CI: 0.81–1.47,  $I^2 = 0\%$ , [Figure 3]).  
18  
19

20  
21  
22 Myocardial infarction was reported in four studies, and cardiac death was  
23  
24 reported in five studies for the secondary endpoint. Moreover, aspirin use was tended  
25  
26 to be linked to a lower incidence of myocardial infarction (OR = 0.62, 95% CI: 0.09–  
27  
28 4.36,  $p = 0.615$ ,  $I^2 = 73.8\%$ ) and a higher incidence of cardiac death (OR = 1.73, 95%  
29  
30 CI: 0.61–4.94,  $p = 0.444$ ,  $I^2 = 0\%$ ) during follow-up, but statistical difference was  
31  
32 lacking between the two groups (Figure 4).  
33  
34  
35

### 36 37 ***Risk of bias assessment and heterogeneity analysis***

38  
39  
40 The scores of NOS for study quality assessment of included studies ranged from 7 to  
41  
42 9 scores (Table 3). Publication bias with the studies of Lee and Lim was presented by  
43  
44 an asymmetry in the funnel plot (Figure 5). Between-study heterogeneity in  
45  
46 MACE-related research was 82.2%. Therefore, the outcome of subgroup analyses of  
47  
48  $I^2$  was 0%, indicating low publication bias (Figure 3). The between-study  
49  
50 heterogeneities in myocardial infarction and cardiac death-related studies were found  
51  
52 to be 73.8% and 0%, respectively, indicating the occurrence of high publication bias  
53  
54 regarding studies on myocardial infarction (Figure 4).  
55  
56  
57  
58  
59  
60

## DISCUSSION

Aspirin use was found to have no significant effect on reducing MACE, myocardial infarction, and cardiac death in VSA patients without significant stenosis, as per the outcomes of this meta-analysis. A tendency of higher risk of MACE and cardiac death was recognized, but not that of myocardial infarction.

Coronary artery spasm (CAS) appears to play a significant role in the pathogenesis of ischemic heart disease including acute coronary syndrome (ACS) and chronic coronary syndrome (CCS) [17]. A common mechanism by which myocardial infarction (MI) or MINOCA manifests by platelet aggregation, which leads to coronary thrombus formation. Aspirin inhibits cyclooxygenase-1 by reducing the production of thromboxane A2 and therefore has been extensively used in primary or secondary prevention of thrombosis among patients with atherosclerosis or coronary artery disease [18, 19]. However, the benefit of low dosage aspirin in primary prevention was counterbalanced by higher rates of treatment-related adverse events [7, 8], yet being controversial in VSA patients. Earlier studies have evidenced aspirin use to aggravate CAS due to the lowered production of thromboxane A2 and increased MACE incidence in VSA patients [20, 21].

MACE incidence exhibited by patients administered low-dose aspirin was significantly higher than that among patients not administered aspirin (hazard ratio [HR] = 1.54; CI: 1.04-2.28;  $p = 0.037$ ) during a 52-months median follow-up period [13]. On the contrary, MI (HR = 0.13; CI: 0.03–0.61;  $p = 0.014$ ) and chest pain recurrence (HR = 0.29; CI: 0.12–0.71;  $p = 0.006$ ) were observed by Lee et al. to have

1  
2  
3  
4 been significantly reduced by aspirin use among VSA patients during follow-up [11].  
5  
6 Acute intimal tears and erosion identified by optical coherence tomography (OCT) are  
7  
8 susceptible to thrombosis leading to MI as per Lee's findings. Therefore, aspirin was  
9  
10 thus evidenced to reduce adverse events in VSA patients with a greater number of  
11  
12 thrombotic intracoronary lesions. Nevertheless, aspirin use was not significantly  
13  
14 correlated with the occurrence of cardiovascular events among VSA patients with  
15  
16 nonsignificant stenosis during a 49-months mean follow-up period ( $p = 0.541$ ) Ishi et  
17  
18 al. [14]. Moreover, the aspirin-treated group exhibited a similar MACE compared  
19  
20 with the no-antiplatelet agent group (HR 0.96, CI: 0.59–1.55,  $p = 0.872$ ) as reported  
21  
22 by Cho. S.S et al. [15]. Antiplatelet therapy was recently shown by Mori et al. to exert  
23  
24 no beneficial effects on MACE (5.7% vs. 3.6%,  $p = 0.20$ ) among VSA patients during  
25  
26 a 32-months median follow-up period [16].  
27  
28  
29  
30  
31  
32  
33  
34

35 A systematic analysis of the available studies investigating the effects of aspirin  
36  
37 use among VSA patients was conducted. Aspirin use may not be linked to a lower risk  
38  
39 of MACE and cardiac death as per this meta-analysis. The subgroup analysis for  
40  
41 MACE indicated that the study by Lee [11] and Lim [13] is quite heterogeneous. The  
42  
43 origin of heterogeneity in these studies may be attributable to chest pain recurrence in  
44  
45 the MACE, which gives an entirely different outcome due to the inclusion of other  
46  
47 literature. The following may be the possible reasons for the lack of beneficial effects  
48  
49 of aspirin use: (i) aspirin use is known to damage the gastric mucosal barrier and  
50  
51 increase the risk of erosions, ulcers, and bleeding by way of inhibiting  
52  
53 cyclooxygenase-1 enzyme activity [22]. Several meta-analyses have indicated that  
54  
55  
56  
57  
58  
59  
60

1  
2  
3  
4 aspirin's efficacy in primary prevention of cardiovascular disease needs to be weighed  
5  
6 against any increase in major bleeding [23-25]; (ii) attributable to adverse effects of  
7  
8 causing asthma and dyspnea, aspirin is likely to cause CAS and increase the  
9  
10 occurrence of MACE or cardiogenic death [26, 27]; (iii) the synthesis of prostacyclin,  
11  
12 a well-known vasodilator released by endothelial cells is inhibited by aspirin [28] and  
13  
14 CAS induced by aspirin, which could, in turn, cause recurrent angina leading to  
15  
16 rehospitalization, myocardial infarction, and cardiac death.  
17  
18  
19  
20  
21

22 In addition, aspirin use has been found in this analysis to have a possible  
23  
24 protective effect on MI. The pharmacological mechanism easily explains the aspirin's  
25  
26 beneficial effects on MI. However there is great heterogeneity, which may be  
27  
28 attributed to the lack of related studies and a different definition of MI by Mori in his  
29  
30 study [16]. Aspirin use in CAS patients is both advantageous as well as  
31  
32 disadvantageous. Further investigations are necessary for the analysis of beneficial  
33  
34 effects to determine whether to recommend.  
35  
36  
37  
38  
39

40 Several potential limitations should also be considered in the case of this  
41  
42 meta-analysis. First, MACE and MI have been defined differently in the included  
43  
44 articles. Ascribe to lack of original data, no standard definition of MACE is accessible  
45  
46 in this meta-analysis. Second, in one of the studies by Mori (2020), not aspirin but an  
47  
48 antiplatelet drug comprising aspirin and P2Y12 inhibitors have been used as the  
49  
50 therapeutic drug. Third, the sample size in the included studies is too small; only a  
51  
52 few studies have conducted propensity matching analysis to balance baseline  
53  
54 characteristics. The limitations inherent to multicenter observational studies  
55  
56  
57  
58  
59  
60



1  
2  
3  
4 performed in both retrospective and prospective manners could not be avoided in this  
5  
6 analysis. Fourth, patients with 40% stenosis are deemed to be VSA patients without  
7  
8 coronary stenosis but might be benefit from aspirin. A subgroup analysis should be  
9  
10 performed next study. Finally, the major bleeding outcome was excluded from this  
11  
12 study, which is essential for understanding the advantages of antiplatelet therapy.  
13  
14  
15 Considering that this study evaluated the prognosis of VSA patients using low-dose  
16  
17 aspirin as the first of its kind, it has its merits.  
18  
19  
20  
21

## 22 **CONCLUSIONS**

23  
24 Aspirin use may not lessen cardiovascular events among VSA patients without  
25  
26 significant stenosis. Owing to its potential adverse effects, regular use of aspirin in  
27  
28 VSA patients without significant stenosis should involve a thoughtful discussion.  
29  
30  
31

## 32 **Acknowledgments**

33  
34 None  
35

## 36 **Contributors**

37  
38 YWL, YC and HYQ conceived, designed and led the study. YWL, QLC, YJ and SHD  
39  
40 investigated, conducted the study and collected data. YWL, HYQ and YC wrote,  
41  
42 revised and edited the manuscript. All authors supervised the study and approved of  
43  
44 the final version submitted.  
45  
46  
47

## 48 **Funding**

49  
50 This study was supported by a grant from the Shenzhen Key Medical Discipline  
51  
52 Construction Fund (No. SZXK003 and No. SZXK059) and Sanming Project of  
53  
54 Medicine in Shenzhen (No. SZSM201412012).  
55  
56

## 57 **Conflict of interest**

58  
59 No conflict of interest  
60

1  
2  
3 **Patient consent for publication**  
4

5 Not required  
6

7  
8 **Provenance and peer review**  
9

10 Not commissioned; externally peer reviewed.  
11

12 **Data availability statement**  
13

14 All data relevant to the study are included in the article or uploaded as supplementary  
15 information.  
16  
17

18  
19 **ORCID iD**  
20

21 Yaowang Lin: <https://orcid.org/0000-0002-4075-4259>  
22

23  
24 **Ethics Statement**  
25

26 The institutional review board at the Shenzhen People's Hospital approved the study  
27 protocol  
28  
29  
30  
31  
32  
33  
34  
35  
36  
37  
38  
39  
40  
41  
42  
43  
44  
45  
46  
47  
48  
49  
50  
51  
52  
53  
54  
55  
56  
57  
58  
59  
60

**REFERENCES**

1. Montone RA, Niccoli G, Fracassi F, *et al.* Patients with acute myocardial infarction and non-obstructive coronary arteries: safety and prognostic relevance of invasive coronary provocative tests. *Eur Heart J* 2018, 39(2):91-98.
2. Kunadian V, Chieffo A, Camici PG, *et al.* An EAPCI Expert Consensus Document on Ischaemia with Non-Obstructive Coronary Arteries in Collaboration with European Society of Cardiology Working Group on Coronary Pathophysiology & Microcirculation Endorsed by Coronary Vasomotor Disorders International Study Group. *Eur Heart J* 2020, 41(37):3504-3520.
3. Lee BK, Lim HS, Fearon WF, *et al.* Invasive evaluation of patients with angina in the absence of obstructive coronary artery disease. *Circulation* 2015, 131(12):1054-1060.
4. Khuddus MA, Pepine CJ, Handberg EM, *et al.* An intravascular ultrasound analysis in women experiencing chest pain in the absence of obstructive coronary artery disease: a substudy from the National Heart, Lung and Blood Institute-Sponsored Women's Ischemia Syndrome Evaluation (WISE). *J Interv Cardiol* 2010, 23(6):511-519.
5. Knuuti J, Wijns W, Saraste A, *et al.* 2019 ESC Guidelines for the diagnosis and management of chronic coronary syndromes. *Eur Heart J* 2020, 41(3):407-477.

- 1  
2  
3  
4 6. Collet JP, Thiele H, Barbato E, *et al.* 2020 ESC Guidelines for the  
5  
6 management of acute coronary syndromes in patients presenting without  
7  
8 persistent ST-segment elevation. *Eur Heart J* 2020.
- 9  
10  
11 7. Group ASC, Bowman L, Mafham M, *et al.* Effects of Aspirin for Primary  
12  
13 Prevention in Persons with Diabetes Mellitus. *N Engl J Med* 2018,  
14  
15 379(16):1529-1539.
- 16  
17 8. Gaziano JM, Brotons C, Coppolecchia R, *et al.* Use of aspirin to reduce risk of  
18  
19 initial vascular events in patients at moderate risk of cardiovascular disease  
20  
21 (ARRIVE): a randomised, double-blind, placebo-controlled trial. *Lancet* 2018,  
22  
23 392(10152):1036-1046.
- 24  
25 9. Guirguis-Blake JM, Evans CV, Senger CA, *et al.* Aspirin for the Primary  
26  
27 Prevention of Cardiovascular Events: A Systematic Evidence Review for the  
28  
29 U.S . Preventive Services Task Force. *Ann Intern Med* 2016, 164(12):804-813.
- 30  
31 10. Zheng SL, Roddick AJ. Association of Aspirin Use for Primary Prevention  
32  
33 With Cardiovascular Events and Bleeding Events: A Systematic Review and  
34  
35 Meta-analysis. *Jama* 2019, 321(3):277-287.
- 36  
37 11. Lee Y, Park HC, Shin J. Clinical efficacy of aspirin with identification of  
38  
39 intimal morphology by optical coherence tomography in preventing event  
40  
41 recurrence in patients with vasospasm-induced acute coronary syndrome. *Int J*  
42  
43 *Cardiovasc Imaging* 2018, 34(11):1697-1706.
- 44  
45 12. Kim MC, Ahn Y, Park KH, *et al.* Clinical outcomes of low-dose aspirin  
46  
47 administration in patients with variant angina pectoris. *Int J Cardiol* 2013,  
48  
49  
50  
51  
52  
53  
54  
55  
56  
57  
58  
59  
60

- 1  
2  
3  
4 167(5):2333-2334.  
5  
6  
7 13. Lim AY, Park TK, Cho SW, *et al.* Clinical implications of low-dose aspirin on  
8  
9 vasospastic angina patients without significant coronary artery stenosis; a  
10  
11 propensity score-matched analysis. *Int J Cardiol* 2016, 221:161-166.  
12  
13  
14 14. Ishii M, Kaikita K, Sato K, *et al.* Impact of aspirin on the prognosis in patients  
15  
16 with coronary spasm without significant atherosclerotic stenosis. *Int J Cardiol*  
17  
18 2016, 220:328-332.  
19  
20  
21 15. Cho SS, Jo SH, Han SH, *et al.* Clopidogrel plus Aspirin Use is Associated  
22  
23 with Worse Long-Term Outcomes, but Aspirin Use Alone is Safe in Patients  
24  
25 with Vasospastic Angina: Results from the VA-Korea Registry, A Prospective  
26  
27 Multi-Center Cohort. *Sci Rep* 2019, 9(1):17783.  
28  
29  
30  
31 16. Mori H, Takahashi J, Sato K, *et al.* The impact of antiplatelet therapy on  
32  
33 patients with vasospastic angina: A multicenter registry study of the Japanese  
34  
35 Coronary Spasm Association. *Int J Cardiol Heart Vasc* 2020, 29:100561.  
36  
37  
38  
39 17. Yasue H, Mizuno Y, Harada E. Coronary artery spasm - Clinical features,  
40  
41 pathogenesis and treatment. *Proc Jpn Acad Ser B Phys Biol Sci* 2019,  
42  
43 95(2):53-66.  
44  
45  
46  
47 18. Capodanno D, Alfonso F, Levine GN, *et al.* ACC/AHA Versus ESC  
48  
49 Guidelines on Dual Antiplatelet Therapy: JACC Guideline Comparison. *J Am*  
50  
51 *Coll Cardiol* 2018, 72(23 Pt A):2915-2931.  
52  
53  
54  
55 19. Valgimigli M, Bueno H, Byrne RA, *et al.* 2017 ESC focused update on dual  
56  
57 antiplatelet therapy in coronary artery disease developed in collaboration with  
58  
59  
60

- 1  
2  
3  
4 EACTS: The Task Force for dual antiplatelet therapy in coronary artery  
5  
6 disease of the European Society of Cardiology (ESC) and of the European  
7  
8 Association for Cardio-Thoracic Surgery (EACTS). *Eur Heart J* 2018,  
9  
10 39(3):213-260.  
11  
12  
13  
14 20. Picard F, Sayah N, Spagnoli V, *et al.* Vasospastic angina: A literature review  
15  
16 of current evidence. *Arch Cardiovasc Dis* 2019, 112(1):44-55.  
17  
18  
19 21. Miwa K, Kambara H, Kawai C. Effect of aspirin in large doses on attacks of  
20  
21 variant angina. *Am Heart J* 1983, 105(2):351-355.  
22  
23  
24 22. Iwamoto J, Saito Y, Honda A, *et al.* Clinical features of gastroduodenal injury  
25  
26 associated with long-term low-dose aspirin therapy. *World J Gastroenterol*  
27  
28 2013, 19(11):1673-1682.  
29  
30  
31 23. Antithrombotic Trialists C, Baigent C, Blackwell L, *et al.* Aspirin in the  
32  
33 primary and secondary prevention of vascular disease: collaborative  
34  
35 meta-analysis of individual participant data from randomised trials. *Lancet*  
36  
37 2009, 373(9678):1849-1860.  
38  
39  
40  
41 24. Xie W, Luo Y, Liang X, *et al.* The Efficacy And Safety Of Aspirin As The  
42  
43 Primary Prevention Of Cardiovascular Disease: An Updated Meta-Analysis.  
44  
45 *Ther Clin Risk Manag* 2019, 15:1129-1140.  
46  
47  
48  
49 25. Whitlock EP, Burda BU, Williams SB, *et al.* Bleeding Risks With Aspirin Use  
50  
51 for Primary Prevention in Adults: A Systematic Review for the U.S.  
52  
53 Preventive Services Task Force. *Ann Intern Med* 2016, 164(12):826-835.  
54  
55  
56  
57 26. Hangouche AJE, Lamliki O, Oukerraj L, *et al.* Kounis syndrome induced by  
58  
59  
60

1  
2  
3  
4 oral intake of aspirin: case report and literature review. *Pan Afr Med J* 2018,  
5  
6 30:301.  
7

- 8  
9 27. Shah NH, Schneider TR, DeFaria Yeh D, *et al.* Eosinophilia-Associated  
10  
11 Coronary Artery Vasospasm in Patients with Aspirin-Exacerbated Respiratory  
12  
13 Di sease. *J Allergy Clin Immunol Pract* 2016, 4(6):1215-1219.  
14  
15  
16  
17 28. Bates ER, Lau WC. Controversies in antiplatelet therapy for patients with  
18  
19 cardiovascular disease. *Circulation* 2005, 111(17):e267-271.  
20  
21  
22  
23  
24  
25  
26  
27  
28  
29  
30  
31  
32  
33  
34  
35  
36  
37  
38  
39  
40  
41  
42  
43  
44  
45  
46  
47  
48  
49  
50  
51  
52  
53  
54  
55  
56  
57  
58  
59  
60

**Table 1. Clinical characteristics of patients in included studies.**

| Characteristics           | Min Chul Kim | Masanobu Ishii                        | A. Young Lim                         | Yonggu Lee                      | Seong-Sik Cho                        | Hiroyoshi Mori                         |
|---------------------------|--------------|---------------------------------------|--------------------------------------|---------------------------------|--------------------------------------|----------------------------------------|
| Aspirin vs. no            | 2013         | 2016                                  | 2016                                 | 2018                            | 2019                                 | 2020                                   |
| Age (year)                | /            | 66.0 ± 9.5 vs. 67.0 ± 8.4, p = 0.428  | 49.0–62.0 vs. 49.0–62.5, p = 0.61    | 51.3±6.7 vs. 50.8±7.5, p = 0.70 | 57.2±11.2 vs. 53.5±11.3, p = 0.001   | 65.4 ± 9.9 vs. 66.7± 10.3, p = 0.07    |
| Males, n (%)              | /            | 47 (42.0) vs. 47 (42.0), p = 1.000    | 359 (82.7) vs. 243 (84.7), p = 0.49  | 60 (78) vs. 55 (71), p = 0.354  | 412 (64.3) vs. 590 (58.4), p = 0.055 | 247 (73.7%) vs. 253 (75.5%) , p = 0.66 |
| Hypertension, n (%)       | /            | 52 (46.4) vs. 57 (50.9), p = 0.504    | 156 (36.0) vs. 104 (36.2), p = 0.96  | 22 (29) vs. 20 (26), p = 0.717  | 294 (45.9) vs. 320 (31.7), p = 0.001 | 158 (47.2%) vs. 166 (49.6%) , p = 0.59 |
| Diabetes mellitus, n (%)  | /            | 26 (23.2) vs. 27 (24.1), p = 0.875    | 98 (22.6) vs. 66 (23.0), p = 0.91    | 17 (22) vs. 16 (19), p = 0.547  | 73 (11.4) vs. 83(8.2), p = 0.037     | 56 (16.7%) vs. 56 (16.7%), p = 1.00    |
| Smoking, n (%)            | /            | 59 (52.7) vs. 52 (46.4), p = 0.350    | 127 (29.3) vs. 87 (30.3), p = 0.78   | 55 (71) vs. 57 (74), p = 0.717  | 183 (28.9) vs. 250(24.7), p = 0.005  | 202 (60.3%) vs. 202 (60.3%), p = 1.00  |
| Dyslipidemia, n (%)       | /            | 62 (55.4) vs. 60 (53.6) , p = 0.788   | 91 (21.0) vs. 62 (21.6), p = 0.84    | /                               | 98 (15.4) vs.160(15.8) , p = 0.800   | 156 (46.6%) vs. 142 (42.4%) , p = 0.31 |
| Ca channel blocker, n (%) | /            | 104 (92.9) vs. 101 (90.2) , p = 0.472 | 420 (96.9) vs. 275 (95.8), p = 0.46  | 50 (65) vs. 48 (62), p = 0.738  | 152 (24.2) vs. 162(16.12), p = 0.001 | 316 (94.3%) vs. 313 (93.4%), p = 0.75  |
| Statin, n (%)             | /            | 38 (33.9) vs. 40 (35.7), p = 0.779    | 182 (42.0) vs. 113 (39.4) , p = 0.49 | /                               | 123 (19.7) vs. 119(11.9), p = 0.001  | 103 (30.7%) vs. 95 (28.4%), p = 0.55   |
| ACEI / ARB, n (%)         | /            | 33(29.5) vs. 25 (22.3), p = 0.288     | 69 (15.9) vs. 43 (15.0) , p = 0.74   | /                               | 152 (24.3) vs.126(12.6), p = 0.001   | 73 (21.8%) vs. 71 (21.2%) , p = 0.93   |



1  
2  
3  
4  
5  
6  
7  
8  
9  
10  
11  
12  
13  
14  
15  
16  
17  
18  
19  
20  
21  
22  
23  
24  
25  
26  
27  
28  
29  
30  
31  
32  
33  
34  
35  
36  
37  
38  
39  
40  
41  
42  
43  
44  
45  
46

|               |   |                      |                      |                      |                         |   |
|---------------|---|----------------------|----------------------|----------------------|-------------------------|---|
| Beta-blocker, | / | 6 (5.4) vs. 7 (6.3), | 1 (0.2) vs. 0 (0.0), | 17 (22) vs. 23 (30), | 54 (8.65) vs. 59(5.88), | / |
| n (%)         |   | p = 0.775            | p = 0.48             | p = 0.270            | p = 0.065               |   |

ACEI / ARB = angiotensin-converting enzyme inhibitor / angiotensin receptor blocker

For peer review only

**Table 2. Baseline characteristics of included studies.**

| Study          | Year | Design                                                    | Participants                         | Total aspirin | Without aspirin | Dosage of aspirin (mg) | MACE definition | MACE                                                                                                         | Myocardial infarction    | Cardiac death       | All cause death            | Follow-up            |        |
|----------------|------|-----------------------------------------------------------|--------------------------------------|---------------|-----------------|------------------------|-----------------|--------------------------------------------------------------------------------------------------------------|--------------------------|---------------------|----------------------------|----------------------|--------|
| Min Chul Kim   | 2013 | Retrospective analysis                                    | Vasospastic angina (stenosis≤50%)    | 240           | 96              | 144                    | 100             | Readmission rate associated with recurrent angina, cardiac death, percutaneous coronary intervention         | 20 (20.8) vs. 29 (20.1)  | /                   | 1 (1.0) vs. 1 (0.7)        | /                    | 1-year |
| Masanobu Ishii | 2016 | Retrospective analysis, propensity score matched analysis | Vasospastic angina (stenosis≤50%)    | 224           | 112             | 112                    | 81–100          | Cardiac death, nonfatal acute myocardial infarction, and unstable angina                                     | 4 (3.6) vs. 6 (5.4)      | 0 vs. 0             | 2 (1.8) vs. 0 (0)          | /                    | 1-year |
| A.Young Lim    | 2016 | Retrospective analysis, propensity score matched analysis | Coronary artery spasm (stenosis≤50%) | 721           | 434             | 287                    | 100             | Cardiac death, acute myocardial infarction, revascularization, or rehospitalization due to recurrent angina. | 100 (23.0) vs. 34 (11.8) | 9 (2.1) vs. 2 (0.7) | 4 (0.9) vs. 3 (1.0), p=0.5 | 10 (2.2) vs. 9 (1.5) | 5-year |
| Yonggu Lee     | 2018 | Retrospective study, propensity score-matched analysis    | Coronary artery spasm (stenosis≤50%) | 154           | 77              | 77                     | 100             | Chest pain recurrence, myocardial infarction, cardiac death                                                  | 9 (11.7) vs. 33 (42.9)   | 2 (3) vs. 13 (17)   | 0 vs. 0                    | 0 vs. 0              | 4-year |
| Seong-Sik Cho  | 2019 | Prospective multicenter cohort                            | Coronary artery spasm (stenosis≤50%) | 1652          | 641             | 1011                   | 100             | all cause death, acute coronary syndrome, and symptomatic arrhythmia                                         | 29 (4.5) vs. 44(4.4)     | /                   | /                          | 3 (0.5) vs. 7(0.7)   | 3-year |

1  
2  
3  
4  
5  
6  
7  
8  
9  
10  
11  
12  
13  
14  
15  
16  
17  
18  
19  
20  
21  
22  
23  
24  
25  
26  
27  
28  
29  
30  
31  
32  
33  
34  
35  
36  
37  
38  
39  
40  
41  
42  
43  
44  
45  
46

---

|                   |      |                                                                 |                                            |     |     |     |                                         |                                                                                                                                       |                          |                  |       |                    |                    |                        |           |
|-------------------|------|-----------------------------------------------------------------|--------------------------------------------|-----|-----|-----|-----------------------------------------|---------------------------------------------------------------------------------------------------------------------------------------|--------------------------|------------------|-------|--------------------|--------------------|------------------------|-----------|
| Hiroyoshi<br>Mori | 2020 | Retrospective study,<br>propensity<br>score-matched<br>analysis | Coronary artery<br>spasm<br>(stenosis≤50%) | 670 | 335 | 335 | Aspirin 100<br>and P2Y12<br>inhibitors. | cardiac death, nonfatal<br>myocardial infarction,<br>hospitalization due to unstable<br>angina pectoris,<br>and appropriate ICD shock | 19 (5.7)<br>vs. 12 (3.6) | 1 (0.3)<br>(0.6) | vs. 2 | 2 (0.6)<br>0 (0.0) | vs.<br>vs. 6 (1.8) | 2 (0.6)<br>vs. 6 (1.8) | 32-months |
|-------------------|------|-----------------------------------------------------------------|--------------------------------------------|-----|-----|-----|-----------------------------------------|---------------------------------------------------------------------------------------------------------------------------------------|--------------------------|------------------|-------|--------------------|--------------------|------------------------|-----------|

---

For peer review only

**Table 3. Newcastle-Ottawa Quality Assessment Scale (NOS) for included studies.**

| Study          | Selection                                |                                     | Comparability             |                                                                          |                                                                 | Outcome               |                                                 | Total scores |                                  |
|----------------|------------------------------------------|-------------------------------------|---------------------------|--------------------------------------------------------------------------|-----------------------------------------------------------------|-----------------------|-------------------------------------------------|--------------|----------------------------------|
|                | Representativeness of the exposed cohort | Selection of the non-exposed cohort | Ascertainment of exposure | Demonstration that outcome of interest was not present at start of study | Comparability of cohorts on the basis of the design or analysis | Assessment of outcome | Was follow-up long enough for outcomes to occur |              | Adequacy of follow up of cohorts |
| Min Chul Kim   | ★                                        | ★                                   | ★                         | ★                                                                        | ☆☆                                                              | ★                     | ★                                               | ★            | 8                                |
| Masanobu Ishii | ★                                        | ☆                                   | ★                         | ★                                                                        | ★★                                                              | ★                     | ★                                               | ★            | 8                                |
| A. Young Lim   | ★                                        | ★                                   | ★                         | ★                                                                        | ☆☆                                                              | ★                     | ★                                               | ★            | 8                                |
| Yonggu Lee     | ★                                        | ★                                   | ★                         | ★                                                                        | ★★                                                              | ★                     | ★                                               | ★            | 9                                |
| Seong-Sik Cho  | ★                                        | ★                                   | ★                         | ★                                                                        | ☆☆                                                              | ★                     | ★                                               | ★            | 8                                |
| Hiroyoshi Mori | ☆                                        | ★                                   | ★                         | ★                                                                        | ☆☆                                                              | ★                     | ★                                               | ★            | 7                                |

1  
2  
3  
4  
5  
6 **Figure legend.**  
7

8 Figure 1. Flow diagram for identification processes.  
9

10  
11 Figure 2. Aspirin use is not associated with a low incidence of MACE in patients with  
12  
13 VSA.  
14

15  
16 Figure 3. Subgroup analysis of MACE of aspirin use in patients with VSA.  
17

18  
19 Figure 4. Secondary endpoints including myocardial infarction, cardiac death, and  
20  
21 all-cause death during 1–5 years of follow-up.  
22

23  
24 Figure 5. Assessment of bias risk of the studies.  
25  
26  
27  
28  
29  
30  
31  
32  
33  
34  
35  
36  
37  
38  
39  
40  
41  
42  
43  
44  
45  
46  
47  
48  
49  
50  
51  
52  
53  
54  
55  
56  
57  
58  
59  
60

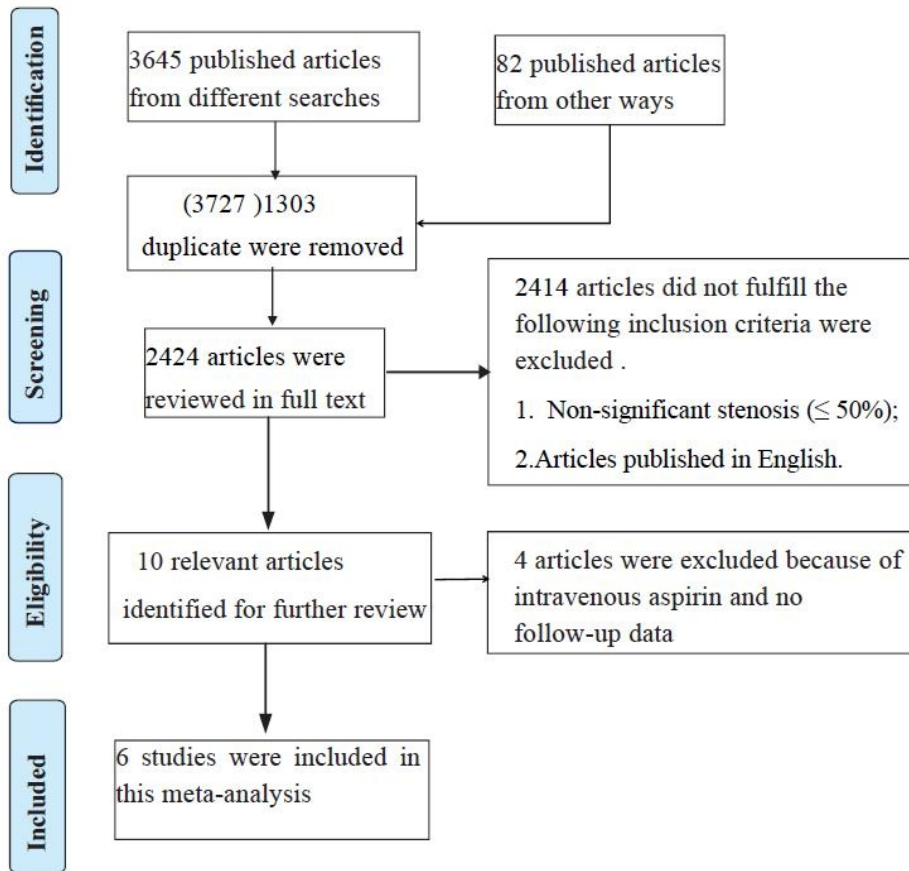

Figure 1. Flow diagram for identification processes.

Figure 1. Flow diagram for identification processes.

139x148mm (144 x 144 DPI)

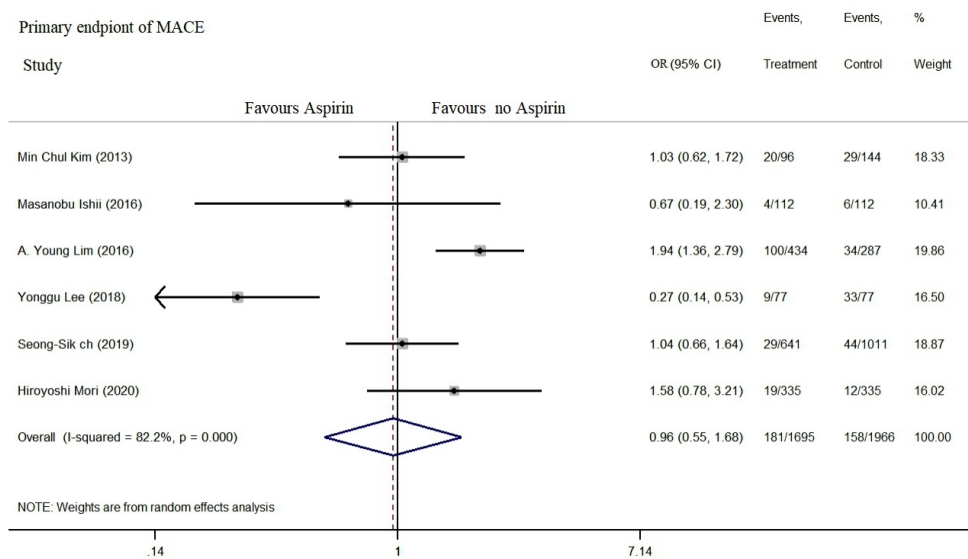

Figure 2. Aspirin use is not associated with a low incidence of MACE in patients with VSA.

231x135mm (144 x 144 DPI)

1  
2  
3  
4  
5  
6  
7  
8  
9  
10  
11  
12  
13  
14  
15  
16  
17  
18  
19  
20  
21  
22  
23  
24  
25  
26  
27  
28  
29  
30  
31  
32  
33  
34  
35  
36  
37  
38  
39  
40  
41  
42  
43  
44  
45  
46  
47  
48  
49  
50  
51  
52  
53  
54  
55  
56  
57  
58  
59  
60

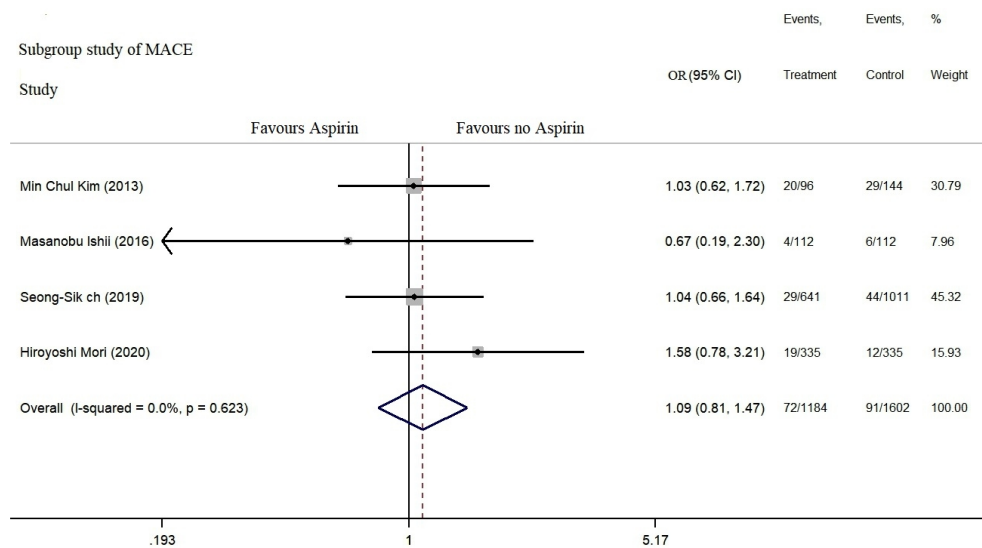

Figure 3. Subgroup analysis of MACE of aspirin use in patients with VSA.

233x136mm (144 x 144 DPI)



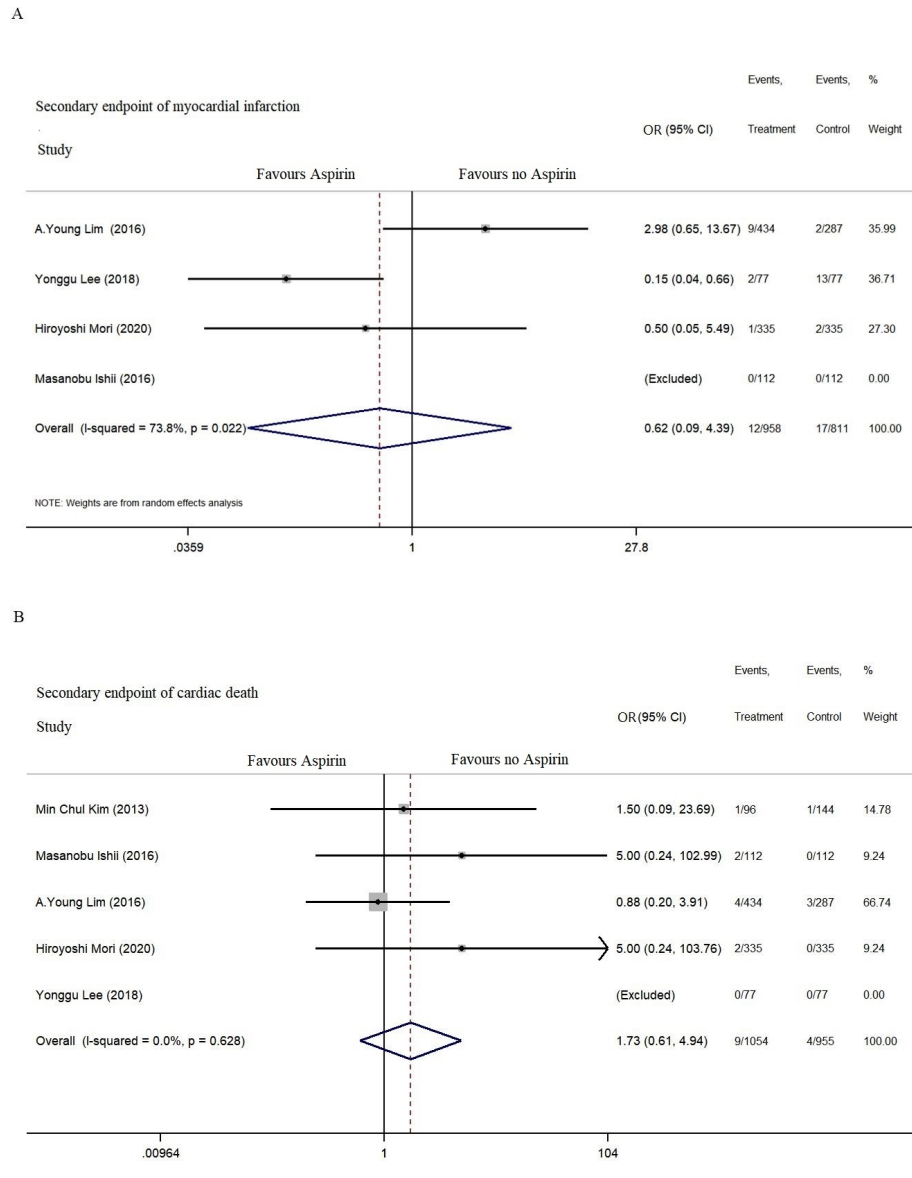

Figure 4. Secondary endpoints including myocardial infarction, cardiac death, and all-cause death during 1–5 years of follow-up.

240x305mm (144 x 144 DPI)



Figure 5. Assess of bias risk of the studies.

477x231mm (96 x 96 DPI)

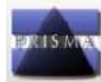

# PRISMA 2009 Checklist

| Section/topic                      | #  | Checklist item                                                                                                                                                                                                                                                                                              | Reported on page # |
|------------------------------------|----|-------------------------------------------------------------------------------------------------------------------------------------------------------------------------------------------------------------------------------------------------------------------------------------------------------------|--------------------|
| <b>TITLE</b>                       |    |                                                                                                                                                                                                                                                                                                             |                    |
| Title                              | 1  | Identify the report as a systematic review, meta-analysis, or both.                                                                                                                                                                                                                                         | Page 1             |
| <b>ABSTRACT</b>                    |    |                                                                                                                                                                                                                                                                                                             |                    |
| Structured summary                 | 2  | Provide a structured summary including, as applicable: background; objectives; data sources; study eligibility criteria, participants, and interventions; study appraisal and synthesis methods; results; limitations; conclusions and implications of key findings; systematic review registration number. | Page 2             |
| <b>INTRODUCTION</b>                |    |                                                                                                                                                                                                                                                                                                             |                    |
| Rationale                          | 3  | Describe the rationale for the review in the context of what is already known.                                                                                                                                                                                                                              | Page 4             |
| Objectives                         | 4  | Provide an explicit statement of questions being addressed with reference to participants, interventions, comparisons, outcomes, and study design (PICOS).                                                                                                                                                  | Page 4             |
| <b>METHODS</b>                     |    |                                                                                                                                                                                                                                                                                                             |                    |
| Protocol and registration          | 5  | Indicate if a review protocol exists, if and where it can be accessed (e.g., Web address), and, if available, provide registration information including registration number.                                                                                                                               | Page 4-5           |
| Eligibility criteria               | 6  | Specify study characteristics (e.g., PICOS, length of follow-up) and report characteristics (e.g., years considered, language, publication status) used as criteria for eligibility, giving rationale.                                                                                                      | Page 4-5           |
| Information sources                | 7  | Describe all information sources (e.g., databases with dates of coverage, contact with study authors to identify additional studies) in the search and date last searched.                                                                                                                                  | Page 4-5           |
| Search                             | 8  | Present full electronic search strategy for at least one database, including any limits used, such that it could be repeated.                                                                                                                                                                               | Page 4-5           |
| Study selection                    | 9  | State the process for selecting studies (i.e., screening, eligibility, included in systematic review, and, if applicable, included in the meta-analysis).                                                                                                                                                   | Page 4-5           |
| Data collection process            | 10 | Describe method of data extraction from reports (e.g., piloted forms, independently, in duplicate) and any processes for obtaining and confirming data from investigators.                                                                                                                                  | Page 4-5           |
| Data items                         | 11 | List and define all variables for which data were sought (e.g., PICOS, funding sources) and any assumptions and simplifications made.                                                                                                                                                                       | Page 4-5           |
| Risk of bias in individual studies | 12 | Describe methods used for assessing risk of bias of individual studies (including specification of whether this was done at the study or outcome level), and how this information is to be used in any data synthesis.                                                                                      | Page 4-5           |
| Summary measures                   | 13 | State the principal summary measures (e.g., risk ratio, difference in means).                                                                                                                                                                                                                               | Page 4-5           |
| Synthesis of results               | 14 | Describe the methods of handling data and combining results of studies, if done, including measures of consistency (e.g., $I^2$ ) for each meta-analysis.                                                                                                                                                   | Page 4-5           |



# PRISMA 2009 Checklist

Page 1 of 2

| Section/topic                 | #  | Checklist item                                                                                                                                                                                           | Reported on page # |
|-------------------------------|----|----------------------------------------------------------------------------------------------------------------------------------------------------------------------------------------------------------|--------------------|
| Risk of bias across studies   | 15 | Specify any assessment of risk of bias that may affect the cumulative evidence (e.g., publication bias, selective reporting within studies).                                                             | Page 4-5           |
| Additional analyses           | 16 | Describe methods of additional analyses (e.g., sensitivity or subgroup analyses, meta-regression), if done, indicating which were pre-specified.                                                         | Page 5             |
| <b>RESULTS</b>                |    |                                                                                                                                                                                                          |                    |
| Study selection               | 17 | Give numbers of studies screened, assessed for eligibility, and included in the review, with reasons for exclusions at each stage, ideally with a flow diagram.                                          | Page 6-7           |
| Study characteristics         | 18 | For each study, present characteristics for which data were extracted (e.g., study size, PICOS, follow-up period) and provide the citations.                                                             | Page 6-7           |
| Risk of bias within studies   | 19 | Present data on risk of bias of each study and, if available, any outcome level assessment (see item 12).                                                                                                | Page 6-7           |
| Results of individual studies | 20 | For all outcomes considered (benefits or harms), present, for each study: (a) simple summary data for each intervention group (b) effect estimates and confidence intervals, ideally with a forest plot. | Page 6-7           |
| Synthesis of results          | 21 | Present results of each meta-analysis done, including confidence intervals and measures of consistency.                                                                                                  | Page 6-7           |
| Risk of bias across studies   | 22 | Present results of any assessment of risk of bias across studies (see Item 15).                                                                                                                          | Page 6-7           |
| Additional analysis           | 23 | Give results of additional analyses, if done (e.g., sensitivity or subgroup analyses, meta-regression [see Item 16]).                                                                                    | Page 6-7           |
| <b>DISCUSSION</b>             |    |                                                                                                                                                                                                          |                    |
| Summary of evidence           | 24 | Summarize the main findings including the strength of evidence for each main outcome; consider their relevance to key groups (e.g., healthcare providers, users, and policy makers).                     | Page 7-10          |
| Limitations                   | 25 | Discuss limitations at study and outcome level (e.g., risk of bias), and at review-level (e.g., incomplete retrieval of identified research, reporting bias).                                            | Page 10            |
| Conclusions                   | 26 | Provide a general interpretation of the results in the context of other evidence, and implications for future research.                                                                                  | Page 10            |
| <b>FUNDING</b>                |    |                                                                                                                                                                                                          |                    |
| Funding                       | 27 | Describe sources of funding for the systematic review and other support (e.g., supply of data); role of funders for the systematic review.                                                               | Page 11            |

From: Moher D, Liberati A, Tetzlaff J, Altman DG, The PRISMA Group (2009). Preferred Reporting Items for Systematic Reviews and Meta-Analyses: The PRISMA Statement. PLoS Med 6(6): e1000097. doi:10.1371/journal.pmed1000097

For peer review only, <http://bmjopen.bmj.com/site/about/guidelines.xhtml>  
For more information, visit: [www.prisma-statement.org](http://www.prisma-statement.org)



# PRISMA 2009 Checklist

For peer review only

- 1
- 2
- 3
- 4
- 5
- 6
- 7
- 8
- 9
- 10
- 11
- 12
- 13
- 14
- 15
- 16
- 17
- 18
- 19
- 20
- 21
- 22
- 23
- 24
- 25
- 26
- 27
- 28
- 29
- 30
- 31
- 32
- 33
- 34
- 35
- 36
- 37
- 38
- 39
- 40
- 41
- 42
- 43
- 44
- 45
- 46
- 47

# BMJ Open

## Impact of Aspirin Use on Clinical Outcomes in Patients With Vasospastic Angina: A Systematic Review and Meta-analysis

|                                 |                                                                                                                                                                                                                                                                                                                                                                                                                        |
|---------------------------------|------------------------------------------------------------------------------------------------------------------------------------------------------------------------------------------------------------------------------------------------------------------------------------------------------------------------------------------------------------------------------------------------------------------------|
| Journal:                        | <i>BMJ Open</i>                                                                                                                                                                                                                                                                                                                                                                                                        |
| Manuscript ID                   | bmjopen-2021-048719.R2                                                                                                                                                                                                                                                                                                                                                                                                 |
| Article Type:                   | Original research                                                                                                                                                                                                                                                                                                                                                                                                      |
| Date Submitted by the Author:   | 28-Jun-2021                                                                                                                                                                                                                                                                                                                                                                                                            |
| Complete List of Authors:       | lin, yaowang; Shenzhen People's Hospital, Department of Cardiology<br>chen, yang; Guangdong Medical University, School of Pharmacy<br>yuan, jie; Shenzhen People's Hospital, Department of Cardiology<br>dong, shaohong; Shenzhen People's Hospital, Department of Cardiology<br>Qin, Haiyan; Shenzhen People's Hospital, Department of Emergency<br>chen, qiuling; Shenzhen People's Hospital, Department of Pharmacy |
| <b>Primary Subject Heading</b>: | Medical management                                                                                                                                                                                                                                                                                                                                                                                                     |
| Secondary Subject Heading:      | Cardiovascular medicine                                                                                                                                                                                                                                                                                                                                                                                                |
| Keywords:                       | Coronary heart disease < CARDIOLOGY, Myocardial infarction < CARDIOLOGY, Vascular medicine < INTERNAL MEDICINE                                                                                                                                                                                                                                                                                                         |
|                                 |                                                                                                                                                                                                                                                                                                                                                                                                                        |

SCHOLARONE™  
Manuscripts



I, the Submitting Author has the right to grant and does grant on behalf of all authors of the Work (as defined in the below author licence), an exclusive licence and/or a non-exclusive licence for contributions from authors who are: i) UK Crown employees; ii) where BMJ has agreed a CC-BY licence shall apply, and/or iii) in accordance with the terms applicable for US Federal Government officers or employees acting as part of their official duties; on a worldwide, perpetual, irrevocable, royalty-free basis to BMJ Publishing Group Ltd ("BMJ") its licensees and where the relevant Journal is co-owned by BMJ to the co-owners of the Journal, to publish the Work in this journal and any other BMJ products and to exploit all rights, as set out in our [licence](#).

The Submitting Author accepts and understands that any supply made under these terms is made by BMJ to the Submitting Author unless you are acting as an employee on behalf of your employer or a postgraduate student of an affiliated institution which is paying any applicable article publishing charge ("APC") for Open Access articles. Where the Submitting Author wishes to make the Work available on an Open Access basis (and intends to pay the relevant APC), the terms of reuse of such Open Access shall be governed by a Creative Commons licence – details of these licences and which [Creative Commons](#) licence will apply to this Work are set out in our licence referred to above.

Other than as permitted in any relevant BMJ Author's Self Archiving Policies, I confirm this Work has not been accepted for publication elsewhere, is not being considered for publication elsewhere and does not duplicate material already published. I confirm all authors consent to publication of this Work and authorise the granting of this licence.

1  
2  
3  
4 **Impact of Aspirin Use on Clinical Outcomes in Patients with Vasospastic Angina:**  
5  
6 **A Systematic Review and Meta-analysis**  
7  
8

9 Yaowang Lin, MD <sup>1,4</sup>; Yang Chen, MD <sup>5</sup>; Jie Yuan, MD <sup>1,4</sup>; Shaohong Dong, MD <sup>1,4</sup>;  
10  
11 Haiyan Qin, MD <sup>2,4#</sup>; Qiuling Chen, MD <sup>3,4#</sup>  
12  
13

14  
15 **Author Affiliations:**  
16

17  
18 <sup>1</sup>Department of Cardiology; <sup>2</sup>Department of Health Management; <sup>3</sup>Department of  
19  
20 Pharmacy; <sup>4</sup>Shenzhen People's Hospital, Second Clinical Medical College of Jinan  
21  
22 University, First affiliated Hospital of South University of Science and Technology,  
23  
24 Shenzhen, Guangdong. No. 1017, Dongmen Northern Road, 518020, Shenzhen,  
25  
26 Guangdong, PR China. <sup>5</sup>School of Pharmacy, Guangdong Medical University,  
27  
28 Dongguan 523808, Guangdong, China  
29  
30  
31  
32  
33  
34  
35

36  
37 **Correspondence should be addressed to Haiyan Qin and Qiuling Chen**  
38

39  
40 Haiyan Qin, MD, e-mail: lgqinhaiyan@yeah.net  
41  
42

43  
44 Qiuling Chen, MD, e-mail: szchenqiuling@yeah.net  
45  
46  
47  
48  
49  
50  
51  
52  
53  
54  
55  
56  
57  
58  
59  
60



## ABSTRACT

**Objectives:** The use of aspirin to prevent cardiovascular disease in vasospastic angina (VSA) patients without significant stenosis has yet to be investigated. In this study we investigated the efficacy of aspirin use among VSA patients.

**Design:** Systematic review and meta-analysis.

**Data sources:** PubMed, Web of Science, and Cochrane Central Register of Controlled Trials were searched for relevant information prior to October 2020.

**Eligibility criteria for selecting studies:** Aspirin use versus no aspirin use (placebo or no treatment) among VSA patients in the absence of significant stenosis.

**Data extraction and synthesis:** Two investigators extracted the study data. Odds ratios (ORs) and 95% confidence intervals (CI) were calculated and graphed as forest plots. The Newcastle-Ottawa Quality Assessment Scale (NOS) tool and Begg's funnel plot were used to assess risk of bias.

1  
2  
3  
4 **Results:** Four propensity-matched cohorts, one retrospective analysis, and one  
5  
6 prospective multicenter cohort, in total comprising 3,661 patients (aspirin use group,  $n$   
7  
8 = 1,695; no aspirin use group,  $n = 1,966$ ) were included in this meta-analysis. Aspirin  
9  
10 use and the incidence of major cardiovascular adverse events (MACE) with follow-up  
11  
12 of 1–5 years were not significantly correlated (combined OR = 0.90, 95% CI: 0.55–  
13  
14 1.68,  $p = 0.829$ ,  $I^2 = 82.2\%$ ; subgroup analysis: OR = 1.09, 95% CI: 0.81–1.47,  $I^2 =$   
15  
16 0%). No significant difference was found between aspirin use and the incidence of  
17  
18 myocardial infarction (OR = 0.62, 95% CI: 0.09–4.36,  $p = 0.615$ ,  $I^2 = 73.8\%$ ) or cardiac  
19  
20 death (OR = 1.73, 95% CI: 0.61–4.94,  $p = 0.444$ ,  $I^2 = 0\%$ ) during follow-up.  
21  
22  
23  
24  
25  
26  
27

28 **Conclusion:** Aspirin use may not reduce the risk of future cardiovascular events in  
29  
30 VSA patients without significant stenosis.  
31  
32  
33  
34  
35  
36  
37

38 **Trial registration number:** PROSPERO (CRD42020214891)  
39  
40  
41  
42  
43  
44  
45  
46  
47  
48  
49  
50  
51  
52  
53  
54  
55  
56  
57  
58  
59  
60

44 **Keywords:** Aspirin, Vasospastic angina, MACE, Cardiac death, Myocardial infarction,  
45  
46  
47 Long-term follow-up  
48  
49  
50  
51  
52  
53  
54  
55  
56  
57  
58  
59  
60

1  
2  
3  
4  
5  
6  
7  
8  
9  
10  
11  
12  
13  
14  
15  
16  
17  
18  
19  
20  
21  
22  
23  
24  
25  
26  
27  
28  
29  
30  
31  
32  
33  
34  
35  
36  
37  
38  
39  
40  
41  
42  
43  
44  
45  
46  
47  
48  
49  
50  
51  
52  
53  
54  
55  
56  
57  
58  
59  
60

For peer review only

**Strengths and limitations of this study**

- ▶ This is the first meta-analysis to evaluate the impact of aspirin use on clinical outcomes in patients with VSA.
  
- ▶ The therapeutic drug in used in the study by Mori (2020) is an antiplatelet drug that includes aspirin and P2Y12 inhibitors.

1  
2  
3  
4 ▶ The limitations inherent to multicenter observational studies performed in both  
5  
6 retrospective and prospective manners may have affected data analysis.  
7

8  
9  
10 ▶ The conclusions of this study should be verified with randomized controlled trials  
11  
12 with larger sample size.  
13  
14  
15  
16  
17  
18  
19  
20  
21  
22  
23  
24  
25  
26  
27  
28  
29  
30  
31  
32  
33  
34  
35  
36  
37  
38  
39  
40  
41  
42  
43  
44  
45  
46  
47  
48  
49  
50  
51  
52  
53  
54  
55  
56  
57  
58  
59  
60

For peer review only

## INTRODUCTION

Coronary spasm characterized by vasospastic angina (VSA) is one cause of ischemia with a non-obstructive coronary artery (INOCA) [1, 2]. VSA patients who also suffer from endothelial dysfunction or coronary atherosclerosis commonly use aspirin [3, 4], per the guidelines of the European Society of Cardiology (ESC), for the management of chronic stable angina and acute coronary syndromes [5, 6].

The ASCEND study showed that the use of low-dose aspirin leads to a lower risk of serious vascular events (8.5% vs. 9.6%;  $p = 0.01$ ) compared to placebo among persons with diabetes in primary treatment, but the absolute benefits of aspirin are largely counterbalanced by the bleeding hazard (4.1% vs. 3.2%;  $p = 0.003$ ) [7]. The ARRIVE study has also suggested that aspirin use may result in a higher incidence of gastrointestinal bleeding (0.97% vs. 0.46%;  $p = 0.0007$ ) or overall incidence of treatment-related adverse events (16.75% vs. 13.54%;  $p < 0.0001$ ) compared to control groups [8]. Owing to the latest controversy and reduced usage of aspirin in preventing cardiovascular events [9, 10], aspirin's efficiency in VSA patients without significant stenosis has not yet been reported [11-16]. Therefore, this meta-analysis was designed to assess the correlation between aspirin use and cardiovascular events and cardiac death among VSA patients during long-term follow-up.

## MATERIALS AND METHODS

### *Search strategy*

1  
2  
3  
4 A comprehensive search of related research articles conducted before October 2020 in  
5  
6 search engines such as PubMed, Web of Science, and Cochrane Central Register of  
7  
8 Controlled Trials was used to gather data. The keywords were “vasospastic angina”,  
9  
10 “coronary vasospasms”, “vasospasm”, “variant angina”, “Prinzmetal's variant angina”,  
11  
12 “spastic coronary angina”, “coronary artery spasm,” as well as “aspirin” and  
13  
14 “antiplatelet therapy”. Certain additional related publications, such as review articles  
15  
16 and editorials, were also assessed. This study was registered with PROSPERO  
17  
18 (CRD42020214891).  
19  
20  
21  
22  
23  
24  
25  
26  
27  
28

### 29 ***Patient and public involvement***

30  
31  
32 Study participants met the eligibility criteria as outlined above. All included patients  
33  
34 were diagnosed with epicardial coronary vasospasms by provocation test. Participants  
35  
36 and other members of the public were not involved in the recruitment, design, conduct,  
37  
38 reporting, or dissemination of this study.  
39  
40  
41  
42  
43  
44  
45  
46

### 47 ***Study selection and data extraction***

48  
49  
50 The patient inclusion criteria were as follows: (i) diagnosed with VSA on provocation  
51  
52 test, (ii) absence of significant stenosis ( $\leq 50\%$ ), (iii) the treatment group was  
53  
54 administered oral aspirin and the control group received no aspirin or placebo, and (iv)  
55  
56 articles published in English. The exclusion criteria were as follows: significant stenosis  
57  
58  
59  
60

1  
2  
3  
4 ( $\geq 50\%$ ), intravenous aspirin, case report, and case series. The study data were  
5  
6 independently extracted by two investigators, namely Lin and Chen, using pre-defined  
7  
8 extraction forms; any conflict was resolved by a third reviewer.  
9  
10

### 11 12 13 14 15 16 ***Data analysis and risk of bias assessment*** 17

18  
19 Major cardiovascular adverse events (MACE) were the primary endpoints, while  
20  
21 myocardial infarction and cardiac death during follow-up were the secondary endpoints.  
22  
23 MACE have been described as cardiac death, acute coronary syndrome, and  
24  
25 hospitalization due to unstable angina, percutaneous coronary intervention,  
26  
27 symptomatic arrhythmia, appropriate implantable cardioverter defibrillator (ICD), and  
28  
29 shock. The Newcastle-Ottawa Quality Assessment Scale (NOS) tool was utilized to  
30  
31 assess the risk of bias, and Begg's funnel plot was used to evaluate publication bias.  
32  
33  
34  
35  
36  
37  
38  
39  
40  
41

### 42 ***Statistical analysis*** 43 44

45 STATA software (version 14.0; StataCorp, College Station, TX, USA) was used for the  
46  
47 meta-analysis. MACE (primary endpoints) and myocardial infarction and cardiac death  
48  
49 (secondary endpoints) were evaluated as combined odds ratios (ORs) with 95%  
50  
51 confidence intervals (CIs). Heterogeneity between studies was derived using the  $I^2$   
52  
53 statistic. If  $I^2 > 50\%$ , the random effect model was used to assess heterogeneity; if  $I^2 <$   
54  
55  $50\%$ , the fixed effect model was utilized to evaluate heterogeneity. Subgroups were  
56  
57  
58  
59  
60

1  
2  
3  
4 studied to reduce the heterogeneity if  $I^2 > 50\%$ .  $P$  values  $< 0.05$  were considered  
5  
6 statistically significant.  
7  
8  
9

## 10 11 12 **RESULTS**

### 13 *Characteristics of included studies*

14  
15  
16  
17  
18 The search engines were reviewed to identify 3,645 related studies, among which 1,303  
19  
20 articles were duplicates and 2,414 articles did not fulfill the inclusion criteria and were  
21  
22 excluded from the study. After removing these studies, 4 propensity-matched cohorts  
23  
24 [11,13,14,16], 1 retrospective analysis [12], and 1 prospective multicenter cohort [15]  
25  
26 (Figure 1), including a total of 3,661 patients (aspirin group,  $n = 1,695$ ; no aspirin group,  
27  
28  $n = 1,966$ , Table 1) were included in the study. Four studies underwent coronary  
29  
30 provocation test, except for 1 study (Seong-Sik Cho, 2019) that used the ECG  
31  
32 provocation test. All studies provided the primary endpoint, with follow-up durations  
33  
34 ranging from 1 to 5 years (Table 2).  
35  
36  
37  
38  
39  
40  
41  
42  
43  
44  
45  
46  
47  
48

### 49 *Primary and secondary endpoints*

50  
51 No significant correlation was recorded between aspirin use and MACE incidence  
52  
53 within the follow-up of 1–5 years (combined OR = 0.90, 95% CI: 0.55–1.68,  $p = 0.829$ ,  
54  
55  $I^2 = 82.2\%$  [Figure 2]; subgroup analysis: OR = 0.89, 95% CI: 0.40–2.02,  $I^2 = 86.9\%$   
56  
57 and OR = 1.09, 95% CI: 0.81–1.47,  $I^2 = 0\%$ , [Figure 3 A and B]).  
58  
59  
60



1  
2  
3  
4 Myocardial infarction was reported in 4 studies, and cardiac death was reported in  
5  
6 5 studies for the secondary endpoint. No significant difference was found between  
7  
8 aspirin use and the incidence of myocardial infarction (OR = 0.62, 95% CI: 0.09–4.36,  
9  
10  $p = 0.615$ ,  $I^2 = 73.8\%$ ) or cardiac death (OR = 1.73, 95% CI: 0.61–4.94,  $p = 0.444$ ,  $I^2 =$   
11  
12 0%) during the follow-up (Figure 4).  
13  
14  
15  
16  
17  
18  
19  
20

### 21 ***Risk of bias assessment and heterogeneity analysis***

22  
23  
24 The NOS scores for study quality assessment of the included studies ranged from 7 to  
25  
26 9 (Table 3). Publication bias is presented by asymmetry in the funnel plot (Figure 5).  
27  
28 Between-study heterogeneity in MACE-related research was 82.2% and 86.9%.  
29  
30 Therefore, the outcome of subgroup analyses of  $I^2$  was 0%, indicating low publication  
31  
32 bias (Figure 3). The between-study heterogeneities in myocardial infarction and cardiac  
33  
34 death-related studies were 73.8% and 0%, respectively, indicating the occurrence of  
35  
36 high publication bias for the myocardial infarction endpoint (Figure 4).  
37  
38  
39  
40  
41  
42  
43  
44  
45  
46

## 47 **DISCUSSION**

48  
49  
50 Our meta-analysis showed that aspirin had no significant effect on reducing MACE,  
51  
52 myocardial infarction, and cardiac death in VSA patients without significant stenosis.  
53  
54  
55

56  
57 Coronary artery spasm (CAS) has been reported to play a significant role in the  
58  
59 pathogenesis of ischemic heart disease, including acute coronary syndrome (ACS) and  
60

1  
2  
3  
4 chronic coronary syndrome (CCS) [17]. A common mechanism by which myocardial  
5  
6 infarction (MI) or MINOCA manifests is by platelet aggregation, which leads to  
7  
8 coronary thrombus formation. Aspirin inhibits cyclooxygenase-1 by reducing the  
9  
10 production of thromboxane A2 and therefore has been extensively used in primary or  
11  
12 secondary prevention of thrombosis among patients with atherosclerosis or coronary  
13  
14 artery disease [18, 19]. However, the benefit of low dosage aspirin in primary  
15  
16 prevention was counterbalanced by higher rates of treatment-related adverse events [7,  
17  
18 8]. Earlier studies have shown that aspirin use can aggravate CAS due to the lowered  
19  
20 production of thromboxane A2 and increased MACE incidence in VSA patients [20,  
21  
22 21]. Thus, the use of aspirin in VSA patients remains controversial.

23  
24  
25  
26  
27  
28  
29  
30  
31 MACE incidence in patients administered low-dose aspirin was significantly higher  
32  
33 than that among patients not administered aspirin (hazard ratio [HR] = 1.54; CI: 1.04-  
34  
35 2.28;  $p = 0.037$ ) during a 52-month median follow-up period [13]. In contrast, MI (HR  
36  
37 = 0.13; CI: 0.03–0.61;  $p = 0.014$ ) and chest pain recurrence (HR = 0.29; CI: 0.12–0.71;  
38  
39  $p = 0.006$ ) were observed by Lee *et al.* to have been significantly reduced by aspirin  
40  
41 use among VSA patients during follow-up [11]. Lee *et al.* showed that acute intimal  
42  
43 tears and erosion identified by optical coherence tomography (OCT) are susceptible to  
44  
45 thrombosis leading to MI. Therefore, aspirin was evidenced to reduce adverse events in  
46  
47 VSA patients with a greater number of thrombotic intracoronary lesions. Nevertheless,  
48  
49 aspirin use was not significantly correlated with the occurrence of cardiovascular events  
50  
51 among VSA patients with nonsignificant stenosis during a 49-month mean follow-up  
52  
53 period ( $p = 0.541$ ) Ishi *et al.* [14]. Moreover, the aspirin-treated group exhibited a  
54  
55  
56  
57  
58  
59  
60

1  
2  
3  
4 similar MACE incidence compared with the non-antiplatelet agent group (HR 0.96, CI:  
5  
6 0.59–1.55,  $p = 0.872$ ) as reported by Cho *et al.* [15]. Antiplatelet therapy was recently  
7  
8 shown by Mori *et al.* to have no beneficial effects on MACE (5.7% vs. 3.6%,  $p = 0.20$ )  
9  
10 among VSA patients during a 32-month median follow-up period [16].  
11  
12  
13  
14

15 Our meta-analysis indicates that aspirin use may not be linked to a lower risk of  
16  
17 MACE and cardiac death. The subgroup analysis of MACE indicated that the studies  
18  
19 by Lee [11] and Lim [13] were heterogeneous. The origin of heterogeneity in these  
20  
21 studies may be attributable to chest pain recurrence in the MACE, which gives an  
22  
23 entirely different outcome due to the definition. The following may potentially explain  
24  
25 the lack of beneficial effects of aspirin use: (i) Aspirin use is known to damage the  
26  
27 gastric mucosal barrier and increase risk of erosions, ulcers, and bleeding by inhibiting  
28  
29 cyclooxygenase-1 enzyme activity [22]. Several meta-analyses have indicated that  
30  
31 aspirin's efficacy in primary prevention of cardiovascular disease should be weighed  
32  
33 against any increase in major bleeding [23-25]. (ii) The adverse effects of asthma and  
34  
35 dyspnea may lead to CAS and increase the occurrence of MACE or cardiogenic death  
36  
37 with aspirin use [26, 27]. (iii) The synthesis of prostacyclin, a well-known vasodilator  
38  
39 released by endothelial cells, is inhibited by aspirin [28] and CAS is induced by aspirin.  
40  
41 This could, in turn, cause recurrent angina leading to rehospitalization, MI, and cardiac  
42  
43 death.  
44  
45  
46  
47  
48  
49  
50  
51  
52  
53

54 We found that aspirin use may have a protective effect against MI, which may be  
55  
56 explained by aspirin's pharmacological mechanism. However, there was high  
57  
58 heterogeneity in the study, which may be attributed to the lack of related studies and a  
59  
60

1  
2  
3  
4 different definition of MI used by Mori [16]. Aspirin use in CAS patients can be both  
5  
6 advantageous and disadvantageous. Further investigation is necessary to determine  
7  
8 when to recommend aspirin use.  
9  
10

11  
12 Several potential limitations should be considered in this meta-analysis. First,  
13  
14 MACE and MI have been defined differently in the included articles. Due to the lack  
15  
16 of original data, no standard definition of MACE was accessible in this meta-analysis.  
17  
18 Second, one study by Mori (2020) showed that an antiplatelet drug containing both  
19  
20 aspirin and P2Y12 inhibitors was used as the therapeutic drug. Third, the sample size  
21  
22 in this analysis is too small; only a few studies conducted propensity matching analysis  
23  
24 to balance baseline characteristics. The limitations inherent to multicenter observational  
25  
26 studies performed in both retrospective and prospective manners could not be avoided  
27  
28 in this analysis. Fourth, patients with 40% stenosis are considered to have VSA without  
29  
30 coronary stenosis but might benefit from aspirin. A subgroup analysis should be  
31  
32 performed in the next study. Finally, the major bleeding outcome was excluded from  
33  
34 this study, which is essential for understanding the advantages of antiplatelet therapy.  
35  
36 Despite these limitations, the merit of this study is that it is the first to evaluate the  
37  
38 prognosis of VSA patients using low-dose aspirin.  
39  
40  
41  
42  
43  
44  
45  
46  
47  
48  
49  
50  
51  
52

## 53 **CONCLUSIONS**

54  
55  
56 Aspirin use may not reduce the risk of cardiovascular events in VSA patients without  
57  
58 significant stenosis. Owing to its potential adverse effects, regular use of aspirin in VSA  
59  
60

1  
2  
3  
4 patients without significant stenosis should involve a thoughtful discussion.  
5  
6  
7  
8  
9

## 10 **Acknowledgments**

11  
12  
13 None  
14  
15

## 16 **Contributors**

17  
18  
19 YWL, QLC, and HYQ conceived, designed, and led the study. YWL, YC, YJ, and SHD  
20 investigated, conducted the study, and collected data. YWL, HYQ, and QLC wrote,  
21 revised, and edited the manuscript. All authors supervised the study and approved the  
22 final version of the manuscript.  
23  
24  
25  
26  
27  
28  
29  
30  
31  
32

## 33 **Funding**

34  
35  
36 This study was supported by a grant from the Shenzhen Key Medical Discipline  
37 Construction Fund (No. SZXK003 and No. SZXK059) and Sanming Project of  
38 Medicine in Shenzhen (No. SZSM201412012).  
39  
40  
41  
42  
43

## 44 **Conflict of interest**

45  
46  
47 No conflict of interest  
48  
49

## 50 **Patient consent for publication**

51  
52  
53 Not required  
54  
55

## 56 **Provenance and peer review**

57  
58  
59 Not commissioned; externally peer reviewed.  
60

### Data availability statement

All data relevant to the study are included in the article or uploaded as supplementary information.

### ORCID iD

Yaowang Lin: <https://orcid.org/0000-0002-4075-4259>

### Ethics Statement

The institutional review board at the Shenzhen People's Hospital approved the study protocol.

### REFERENCES

1. Montone RA, Niccoli G, Fracassi F, *et al.* Patients with acute myocardial infarction and non-obstructive coronary arteries: safety and prognostic relevance of invasive coronary provocative tests. *Eur Heart J* 2018, 39(2):91-98.
2. Kunadian V, Chieffo A, Camici PG, *et al.* An EAPCI Expert Consensus

- 1  
2  
3  
4 Document on Ischaemia with Non-Obstructive Coronary Arteries in Collaborati  
5  
6 on with European Society of Cardiology Working Group on Coronary  
7  
8 Pathophysiology & Microcirculation Endorsed by Coronary Vasomotor  
9  
10 Disorders International Study Group. *Eur Heart J* 2020, 41(37):3504-3520.  
11  
12  
13  
14  
15 3. Lee BK, Lim HS, Fearon WF, *et al.* Invasive evaluation of patients with angina  
16  
17 in the absence of obstructive coronary artery disease. *Circulation* 2015,  
18  
19 131(12):1054-1060.  
20  
21  
22  
23 4. Khuddus MA, Pepine CJ, Handberg EM, *et al.* An intravascular ultrasound  
24  
25 analysis in women experiencing chest pain in the absence of obstructive  
26  
27 coronary artery disease: a substudy from the National Heart, Lung and Blood  
28  
29 Institute-Sponsored Women's Ischemia Syndrome Evaluation (WISE). *J Interv*  
30  
31 *Cardiol* 2010, 23(6):511-519.  
32  
33  
34  
35  
36  
37 5. Knuuti J, Wijns W, Saraste A, *et al.* 2019 ESC Guidelines for the diagnosis and  
38  
39 management of chronic coronary syndromes. *Eur Heart J* 2020, 41(3):407-477.  
40  
41  
42  
43 6. Collet JP, Thiele H, Barbato E, *et al.* 2020 ESC Guidelines for the management  
44  
45 of acute coronary syndromes in patients presenting without persistent ST-  
46  
47 segment elevation. *Eur Heart J* 2020.  
48  
49  
50  
51  
52 7. Group ASC, Bowman L, Mafham M, *et al.* Effects of Aspirin for Primary  
53  
54 Prevention in Persons with Diabetes Mellitus. *N Engl J Med* 2018,  
55  
56 379(16):1529-1539.  
57  
58  
59  
60

- 1  
2  
3  
4 8. Gaziano JM, Brotons C, Coppolecchia R, *et al.* Use of aspirin to reduce risk of  
5  
6  
7  
8  
9  
10  
11  
12  
13  
14  
15  
16  
17  
18  
19  
20  
21  
22  
23  
24  
25  
26  
27  
28  
29  
30  
31  
32  
33  
34  
35  
36  
37  
38  
39  
40  
41  
42  
43  
44  
45  
46  
47  
48  
49  
50  
51  
52  
53  
54  
55  
56  
57  
58  
59  
60  
10. Zheng SL, Roddick AJ. Association of Aspirin Use for Primary Prevention With  
Cardiovascular Events and Bleeding Events: A Systematic Review and Meta-  
analysis. *Jama* 2019, 321(3):277-287.
11. Lee Y, Park HC, Shin J. Clinical efficacy of aspirin with identification of intimal  
morphology by optical coherence tomography in preventing event recurrence in  
patients with vasospasm-induced acute coronary syndrome. *Int J Cardiovasc  
Imaging* 2018, 34(11):1697-1706.
12. Kim MC, Ahn Y, Park KH, *et al.* Clinical outcomes of low-dose aspirin  
administration in patients with variant angina pectoris. *Int J Cardiol* 2013,  
167(5):2333-2334.
13. Lim AY, Park TK, Cho SW, *et al.* Clinical implications of low-dose aspirin on  
vasospastic angina patients without significant coronary artery stenosis; a  
propensity score-matched analysis. *Int J Cardiol* 2016, 221:161-166.



- 1  
2  
3  
4 14. Ishii M, Kaikita K, Sato K, *et al.* Impact of aspirin on the prognosis in patients  
5  
6 with coronary spasm without significant atherosclerotic stenosis. *Int J Cardiol*  
7  
8 2016, 220:328-332.  
9  
10  
11  
12 15. Cho SS, Jo SH, Han SH, *et al.* Clopidogrel plus Aspirin Use is Associated with  
13  
14 Worse Long-Term Outcomes, but Aspirin Use Alone is Safe in Patients with  
15  
16 Vasospastic Angina: Results from the VA-Korea Registry, A Prospective Multi-  
17  
18 Center Cohort. *Sci Rep* 2019, 9(1):17783.  
19  
20  
21  
22  
23 16. Mori H, Takahashi J, Sato K, *et al.* The impact of antiplatelet therapy on patients  
24  
25 with vasospastic angina: A multicenter registry study of the Japanese Coronary  
26  
27 Spasm Association. *Int J Cardiol Heart Vasc* 2020, 29:100561.  
28  
29  
30  
31  
32 17. Yasue H, Mizuno Y, Harada E. Coronary artery spasm - Clinical features,  
33  
34 pathogenesis and treatment. *Proc Jpn Acad Ser B Phys Biol Sci* 2019, 95(2):53-  
35  
36 66.  
37  
38  
39  
40  
41 18. Capodanno D, Alfonso F, Levine GN, *et al.* ACC/AHA Versus ESC Guidelines  
42  
43 on Dual Antiplatelet Therapy: JACC Guideline Comparison. *J Am Coll Cardiol*  
44  
45 2018, 72(23 Pt A):2915-2931.  
46  
47  
48  
49 19. Valgimigli M, Bueno H, Byrne RA, *et al.* 2017 ESC focused update on dual  
50  
51 antiplatelet therapy in coronary artery disease developed in collaboration with  
52  
53 EACTS: The Task Force for dual antiplatelet therapy in coronary artery disease  
54  
55 of the European Society of Cardiology (ESC) and of the European Association  
56  
57 for Cardio-Thoracic Surgery (EACTS). *Eur Heart J* 2018, 39(3):213-260.  
58  
59  
60

- 1  
2  
3  
4 20. Picard F, Sayah N, Spagnoli V, *et al.* Vasospastic angina: A literature review of  
5  
6 current evidence. *Arch Cardiovasc Dis* 2019, 112(1):44-55.  
7  
8  
9  
10 21. Miwa K, Kambara H, Kawai C. Effect of aspirin in large doses on attacks of  
11  
12 variant angina. *Am Heart J* 1983, 105(2):351-355.  
13  
14  
15  
16 22. Iwamoto J, Saito Y, Honda A, *et al.* Clinical features of gastroduodenal injury  
17  
18 associated with long-term low-dose aspirin therapy. *World J Gastroenterol*  
19  
20 2013, 19(11):1673-1682.  
21  
22  
23  
24 23. Antithrombotic Trialists C, Baigent C, Blackwell L, *et al.* Aspirin in the primary  
25  
26 and secondary prevention of vascular disease: collaborative meta-analysis of  
27  
28 individual participant data from randomised trials. *Lancet* 2009,  
29  
30 373(9678):1849-1860.  
31  
32  
33  
34  
35 24. Xie W, Luo Y, Liang X, *et al.* The Efficacy And Safety Of Aspirin As The  
36  
37 Primary Prevention Of Cardiovascular Disease: An Updated Meta-Analysis.  
38  
39 *Theor Clin Risk Manag* 2019, 15:1129-1140.  
40  
41  
42  
43  
44 25. Whitlock EP, Burda BU, Williams SB, *et al.* Bleeding Risks With Aspirin Use  
45  
46 for Primary Prevention in Adults: A Systematic Review for the U.S. Preventive  
47  
48 Services Task Force. *Ann Intern Med* 2016, 164(12):826-835.  
49  
50  
51  
52  
53 26. Hangouche AJE, Lamliki O, Oukerraj L, *et al.* Kounis syndrome induced by  
54  
55 oral intake of aspirin: case report and literature review. *Pan Afr Med J* 2018,  
56  
57 30:301.  
58  
59  
60

- 1  
2  
3  
4 27. Shah NH, Schneider TR, DeFaria Yeh D, *et al.* Eosinophilia-Associated  
5  
6 Coronary Artery Vasospasm in Patients with Aspirin-Exacerbated Respiratory  
7  
8 Disease. *J Allergy Clin Immunol Pract* 2016, 4(6):1215-1219.  
9  
10  
11  
12 28. Bates ER, Lau WC. Controversies in antiplatelet therapy for patients with  
13  
14 cardiovascular disease. *Circulation* 2005, 111(17):e267-271.  
15  
16  
17  
18  
19  
20  
21  
22  
23  
24  
25  
26  
27  
28  
29  
30  
31  
32  
33  
34  
35  
36  
37  
38  
39  
40  
41  
42  
43  
44  
45  
46  
47  
48  
49  
50  
51  
52  
53  
54  
55  
56  
57  
58  
59  
60

For peer review only

**Table 1. Clinical characteristics of patients in included studies.**

| Characteristics             | Min Chul Kim | Masanobu Ishii                          | A. Young Lim                           | Yonggu Lee                         | Seong-Sik Cho                           | Hiroyoshi Mori                            |
|-----------------------------|--------------|-----------------------------------------|----------------------------------------|------------------------------------|-----------------------------------------|-------------------------------------------|
| Aspirin vs. no              | 2013         | 2016                                    | 2016                                   | 2018                               | 2019                                    | 2020                                      |
| Age<br>(year)               | /            | 66.0 ± 9.5 vs. 67.0 ± 8.4,<br>p = 0.428 | 49.0–62.0 vs. 49.0–62.5,<br>p = 0.61   | 51.3±6.7 vs. 50.8±7.5,<br>p = 0.70 | 57.2±11.2 vs. 53.5±11.3,<br>p = 0.001   | 65.4 ± 9.9 vs. 66.7± 10.3,<br>p = 0.07    |
| Males,<br>n (%)             | /            | 47 (42.0) vs. 47 (42.0),<br>p = 1.000   | 359 (82.7) vs. 243 (84.7),<br>p = 0.49 | 60 (78) vs. 55 (71),<br>p = 0.354  | 412 (64.3) vs. 590 (58.4),<br>p = 0.055 | 247 (73.7%) vs. 253 (75.5%) ,<br>p = 0.66 |
| Hypertension,<br>n (%)      | /            | 52 (46.4) vs. 57 (50.9),<br>p = 0.504   | 156 (36.0) vs. 104 (36.2),<br>p = 0.96 | 22 (29) vs. 20 (26),<br>p = 0.717  | 294 (45.9) vs. 320 (31.7),<br>p = 0.001 | 158 (47.2%) vs. 166 (49.6%) ,<br>p = 0.59 |
| Diabetes mellitus,<br>n (%) | /            | 26 (23.2) vs. 27 (24.1),<br>p = 0.875   | 98 (22.6) vs. 66 (23.0),<br>p = 0.91   | 17 (22) vs. 16 (19),<br>p = 0.547  | 73 (11.4) vs. 83(8.2),<br>p = 0.037     | 56 (16.7%) vs. 56 (16.7%),<br>p = 1.00    |
| Smoking,<br>n (%)           | /            | 59 (52.7) vs. 52 (46.4),<br>p = 0.350   | 127 (29.3) vs. 87 (30.3),<br>p = 0.78  | 55 (71) vs. 57 (74),<br>p = 0.717  | 183 (28.9) vs. 250(24.7),<br>p = 0.005  | 202 (60.3%) vs. 202 (60.3%),<br>p = 1.00  |

|                     |   |                           |                             |                      |                            |                               |
|---------------------|---|---------------------------|-----------------------------|----------------------|----------------------------|-------------------------------|
| Dyslipidemia,       | / | 62 (55.4) vs. 60 (53.6) , | 91 (21.0) vs. 62 (21.6),    | /                    | 98 (15.4) vs.160(15.8) ,   | 156 (46.6%) vs. 142 (42.4%) , |
| n (%)               |   | p = 0.788                 | p = 0.84                    |                      | p = 0.800                  | p = 0.31                      |
| Ca channel blocker, | / | 104 (92.9) vs. 101        | 420 (96.9) vs. 275 (95.8),  | 50 (65) vs. 48 (62), | 152 (24.2) vs. 162(16.12), | 316 (94.3%) vs. 313 (93.4%),  |
| n (%)               |   | (90.2) ,                  | p = 0.46                    | p = 0.738            | p = 0.001                  | p = 0.75                      |
|                     |   | p = 0.472                 |                             |                      |                            |                               |
| Statin,             | / | 38 (33.9) vs. 40 (35.7),  | 182 (42.0) vs. 113 (39.4) , | /                    | 123 (19.7) vs. 119(11.9),  | 103 (30.7%) vs. 95 (28.4%),   |
| n (%)               |   | p = 0.779                 | p = 0.49                    |                      | p = 0.001                  | p = 0.55                      |
| ACEI / ARB,         | / | 33(29.5) vs. 25 (22.3),   | 69 (15.9) vs. 43 (15.0) ,   | /                    | 152 (24.3) vs.126(12.6),   | 73 (21.8%) vs. 71 (21.2%) ,   |
| n (%)               |   | p = 0.288                 | p = 0.74                    |                      | p = 0.001                  | p = 0.93                      |
| Beta-blocker,       | / | 6 (5.4) vs. 7 (6.3),      | 1 (0.2) vs. 0 (0.0),        | 17 (22) vs. 23 (30), | 54 (8.65) vs. 59(5.88),    | /                             |
| n (%)               |   | p = 0.775                 | p = 0.48                    | p = 0.270            | p = 0.065                  |                               |

ACEI / ARB = angiotensin-converting enzyme inhibitor / angiotensin receptor blocker

1  
2  
3  
4  
5  
6  
7  
8  
9  
10  
11  
12  
13  
14  
15  
16  
17  
18  
19  
20  
21  
22  
23  
24  
25  
26  
27  
28  
29  
30  
31  
32  
33  
34  
35  
36  
37  
38  
39  
40  
41  
42  
43  
44  
45  
46

For peer review only

Table 2. Baseline characteristics of included studies.

| Study          | Year | Design                                                    | Participants                           | Total aspirin | Without aspirin | Dosage of aspirin (mg) | MACE definition | MACE                                                                                                         | Myocardial infarction    | Cardiac death       | All cause death            | Follow-up            |        |
|----------------|------|-----------------------------------------------------------|----------------------------------------|---------------|-----------------|------------------------|-----------------|--------------------------------------------------------------------------------------------------------------|--------------------------|---------------------|----------------------------|----------------------|--------|
| Min Chul Kim   | 2013 | Retrospective analysis                                    | Vasospastic angina (stenosis ≤ 70%)    | 240           | 96              | 144                    | 100             | Readmission rate associated with recurrent angina, cardiac death, percutaneous coronary intervention         | 20 (20.8) vs. 29 (20.1)  | /                   | 1 (1.0) vs. 1 (0.7)        | /                    | 1-year |
| Masanobu Ishii | 2016 | Retrospective analysis, propensity score matched analysis | Vasospastic angina (stenosis ≤ 50%)    | 224           | 112             | 112                    | 81–100          | Cardiac death, nonfatal acute myocardial infarction, and unstable angina                                     | 4 (3.6) vs. 6 (5.4)      | 0 vs. 0             | 2 (1.8) vs. 0 (0)          | /                    | 1-year |
| A.Young Lim    | 2016 | Retrospective analysis, propensity score matched analysis | Coronary artery spasm (stenosis ≤ 50%) | 721           | 434             | 287                    | 100             | Cardiac death, acute myocardial infarction, revascularization, or rehospitalization due to recurrent angina. | 100 (23.0) vs. 34 (11.8) | 9 (2.1) vs. 2 (0.7) | 4 (0.9) vs. 3 (1.0), p=0.5 | 10 (2.2) vs. 9 (1.5) | 5-year |
| Yonggu Lee     | 2018 | Retrospective study, propensity score-matched analysis    | Coronary artery spasm (stenosis ≤ 50%) | 154           | 77              | 77                     | 100             | Chest pain recurrence, myocardial infarction, cardiac death                                                  | 9 (11.7) vs. 33 (42.9)   | 2 (3) vs. 13 (17)   | 0 vs. 0                    | 0 vs. 0              | 4-year |

|    |           |      |                      |                        |     |      |             |                                 |              |               |             |             |           |  |  |
|----|-----------|------|----------------------|------------------------|-----|------|-------------|---------------------------------|--------------|---------------|-------------|-------------|-----------|--|--|
| 1  |           |      |                      |                        |     |      |             |                                 |              |               |             |             |           |  |  |
| 2  |           |      |                      |                        |     |      |             |                                 |              |               |             |             |           |  |  |
| 3  |           |      |                      |                        |     |      |             |                                 |              |               |             |             |           |  |  |
| 4  |           |      |                      |                        |     |      |             |                                 |              |               |             |             |           |  |  |
| 5  |           |      | Coronary artery      |                        |     |      |             | all cause death, acute coronary |              |               |             |             |           |  |  |
| 6  | Seong-Sik | 2019 | Prospective          | spasm (stenosis ≤ 1652 | 641 | 1011 | 100         | syndrome, and symptomatic       | 29 (4.5) vs. | /             | /           | 3 (0.5) vs. | 3-year    |  |  |
| 7  | Cho       |      | multicenter cohort   | 50%)                   |     |      |             | arrhythmia                      | 44(4.4)      |               |             | 7(0.7)      |           |  |  |
| 8  |           |      |                      |                        |     |      |             |                                 |              |               |             |             |           |  |  |
| 9  |           |      |                      |                        |     |      |             |                                 |              |               |             |             |           |  |  |
| 10 |           |      |                      |                        |     |      |             | cardiac death, nonfatal         |              |               |             |             |           |  |  |
| 11 |           |      |                      |                        |     |      |             | myocardial infarction,          |              |               |             |             |           |  |  |
| 12 | Hiroyoshi | 2020 | Retrospective study, | Coronary artery        |     |      | Aspirin 100 | hospitalization due to unstable | 19 (5.7)     | 1 (0.3) vs. 2 | 2 (0.6) vs. | 2 (0.6)     | 32-months |  |  |
| 13 | Mori      |      | propensity score-    | spasm (stenosis ≤ 670  | 335 | 335  | and P2Y12   | angina pectoris,                | vs. 12 (3.6) | (0.6)         | 0 (0.0)     | vs. 6 (1.8) |           |  |  |
| 14 |           |      | matched analysis     | 50%)                   |     |      | inhibitors. | and appropriate ICD shock       |              |               |             |             |           |  |  |
| 15 |           |      |                      |                        |     |      |             |                                 |              |               |             |             |           |  |  |
| 16 |           |      |                      |                        |     |      |             |                                 |              |               |             |             |           |  |  |
| 17 |           |      |                      |                        |     |      |             |                                 |              |               |             |             |           |  |  |
| 18 |           |      |                      |                        |     |      |             |                                 |              |               |             |             |           |  |  |
| 19 |           |      |                      |                        |     |      |             |                                 |              |               |             |             |           |  |  |
| 20 |           |      |                      |                        |     |      |             |                                 |              |               |             |             |           |  |  |
| 21 |           |      |                      |                        |     |      |             |                                 |              |               |             |             |           |  |  |
| 22 |           |      |                      |                        |     |      |             |                                 |              |               |             |             |           |  |  |
| 23 |           |      |                      |                        |     |      |             |                                 |              |               |             |             |           |  |  |
| 24 |           |      |                      |                        |     |      |             |                                 |              |               |             |             |           |  |  |
| 25 |           |      |                      |                        |     |      |             |                                 |              |               |             |             |           |  |  |
| 26 |           |      |                      |                        |     |      |             |                                 |              |               |             |             |           |  |  |
| 27 |           |      |                      |                        |     |      |             |                                 |              |               |             |             |           |  |  |
| 28 |           |      |                      |                        |     |      |             |                                 |              |               |             |             |           |  |  |
| 29 |           |      |                      |                        |     |      |             |                                 |              |               |             |             |           |  |  |
| 30 |           |      |                      |                        |     |      |             |                                 |              |               |             |             |           |  |  |
| 31 |           |      |                      |                        |     |      |             |                                 |              |               |             |             |           |  |  |
| 32 |           |      |                      |                        |     |      |             |                                 |              |               |             |             |           |  |  |
| 33 |           |      |                      |                        |     |      |             |                                 |              |               |             |             |           |  |  |
| 34 |           |      |                      |                        |     |      |             |                                 |              |               |             |             |           |  |  |
| 35 |           |      |                      |                        |     |      |             |                                 |              |               |             |             |           |  |  |
| 36 |           |      |                      |                        |     |      |             |                                 |              |               |             |             |           |  |  |
| 37 |           |      |                      |                        |     |      |             |                                 |              |               |             |             |           |  |  |
| 38 |           |      |                      |                        |     |      |             |                                 |              |               |             |             |           |  |  |
| 39 |           |      |                      |                        |     |      |             |                                 |              |               |             |             |           |  |  |
| 40 |           |      |                      |                        |     |      |             |                                 |              |               |             |             |           |  |  |
| 41 |           |      |                      |                        |     |      |             |                                 |              |               |             |             |           |  |  |
| 42 |           |      |                      |                        |     |      |             |                                 |              |               |             |             |           |  |  |
| 43 |           |      |                      |                        |     |      |             |                                 |              |               |             |             |           |  |  |
| 44 |           |      |                      |                        |     |      |             |                                 |              |               |             |             |           |  |  |
| 45 |           |      |                      |                        |     |      |             |                                 |              |               |             |             |           |  |  |
| 46 |           |      |                      |                        |     |      |             |                                 |              |               |             |             |           |  |  |



1  
2  
3  
4  
5  
6  
7  
8  
9  
10  
11  
12  
13  
14  
15  
16  
17  
18  
19  
20  
21  
22  
23  
24  
25  
26  
27  
28  
29  
30  
31  
32  
33  
34  
35  
36  
37  
38  
39  
40  
41  
42  
43  
44  
45  
46

For peer review only

**Table 3. Newcastle-Ottawa Quality Assessment Scale (NOS) for included studies.**

| Selection | Comparability | Outcome |
|-----------|---------------|---------|
|-----------|---------------|---------|

| Study          | Representativeness of the exposed cohort | Selection of the non-exposed cohort | Ascertainment of exposure | Demonstration that outcome of interest was not present at start of study | Comparability of cohorts on the basis of the design or analysis | Assessment of outcome | Was follow-up long enough for outcomes to occur | Adequacy of follow up of cohorts | Total scores |
|----------------|------------------------------------------|-------------------------------------|---------------------------|--------------------------------------------------------------------------|-----------------------------------------------------------------|-----------------------|-------------------------------------------------|----------------------------------|--------------|
| Min Chul Kim   | ★                                        | ★                                   | ★                         | ★                                                                        | ☆☆                                                              | ★                     | ★                                               | ★                                | 8            |
| Masanobu Ishii | ★                                        | ☆                                   | ★                         | ★                                                                        | ★★                                                              | ★                     | ★                                               | ★                                | 8            |
| A.Young Lim    | ★                                        | ★                                   | ★                         | ★                                                                        | ☆☆                                                              | ★                     | ★                                               | ★                                | 8            |
| Yonggu Lee     | ★                                        | ★                                   | ★                         | ★                                                                        | ★★                                                              | ★                     | ★                                               | ★                                | 9            |
| Seong-Sik Cho  | ★                                        | ★                                   | ★                         | ★                                                                        | ☆☆                                                              | ★                     | ★                                               | ★                                | 8            |
| Hiroyoshi Mori | ☆                                        | ★                                   | ★                         | ★                                                                        | ☆☆                                                              | ★                     | ★                                               | ★                                | 7            |

1  
2  
3  
4  
5  
6  
7  
8 **Figure legends.**  
9

10  
11 Figure 1. Flow diagram for identification processes.  
12

13  
14 Figure 2. Aspirin use is not associated with a low incidence of MACE in patients with  
15  
16  
17 VSA.  
18

19  
20 Figure 3. Subgroup analysis of MACE with aspirin use in patients with VSA.  
21

22  
23 Figure 4. Secondary endpoints including myocardial infarction, cardiac death, and all-  
24  
25  
26  
27  
28  
29  
30  
31  
32  
33  
34  
35  
36  
37  
38  
39  
40  
41  
42  
43  
44  
45  
46  
47  
48  
49  
50  
51  
52  
53  
54  
55  
56  
57  
58  
59  
60  
cause death during 1–5 years of follow-up.

Figure 5. Assessment of bias risk of the studies.



Figure 1. Flow diagram for identification processes.

Figure 1. Flow diagram for identification processes.

139x148mm (144 x 144 DPI)



Figure 2. Aspirin use is not associated with a low incidence of MACE in patients with VSA.

231x135mm (144 x 144 DPI)

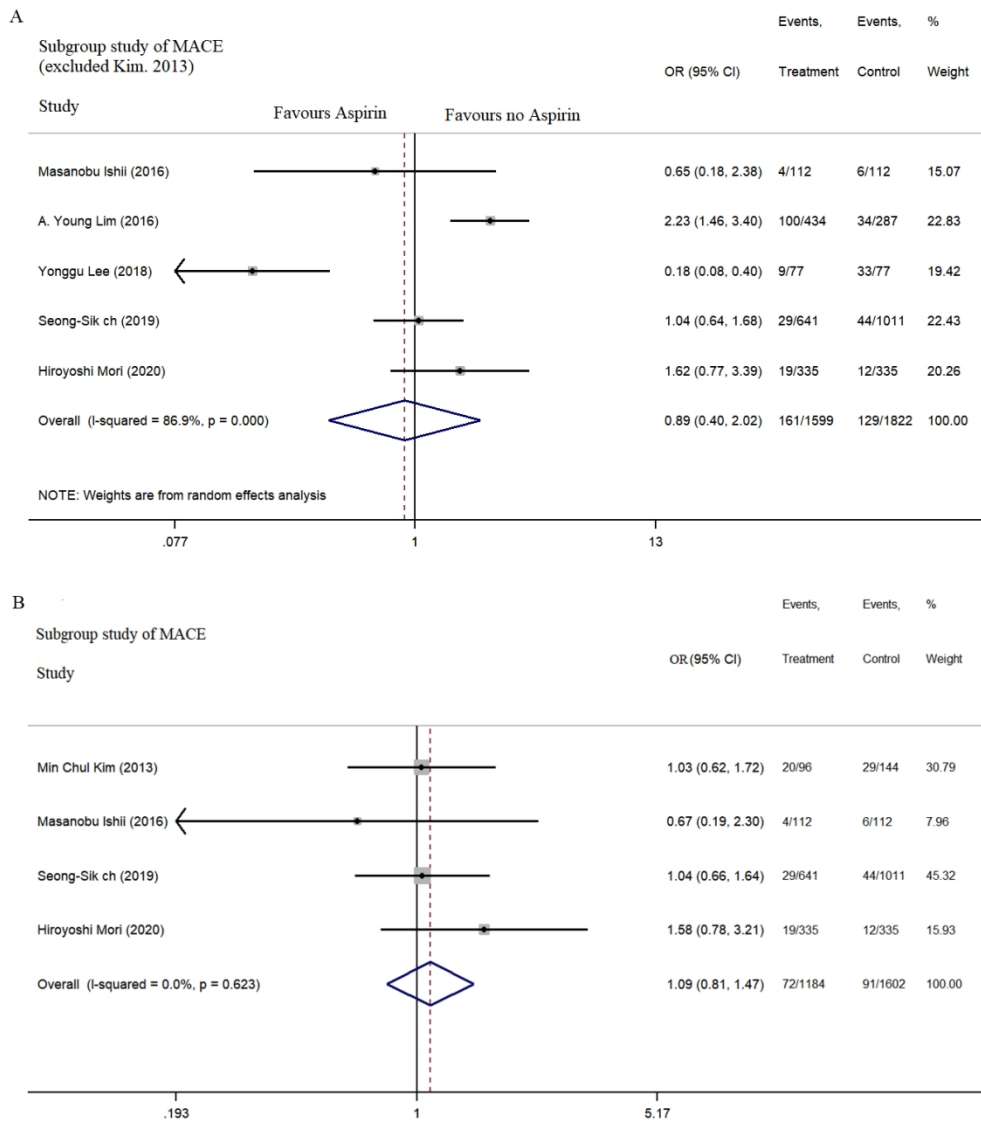

Figure 3. Subgroup analysis of MACE with aspirin use in patients with VSA.

358x411mm (96 x 96 DPI)

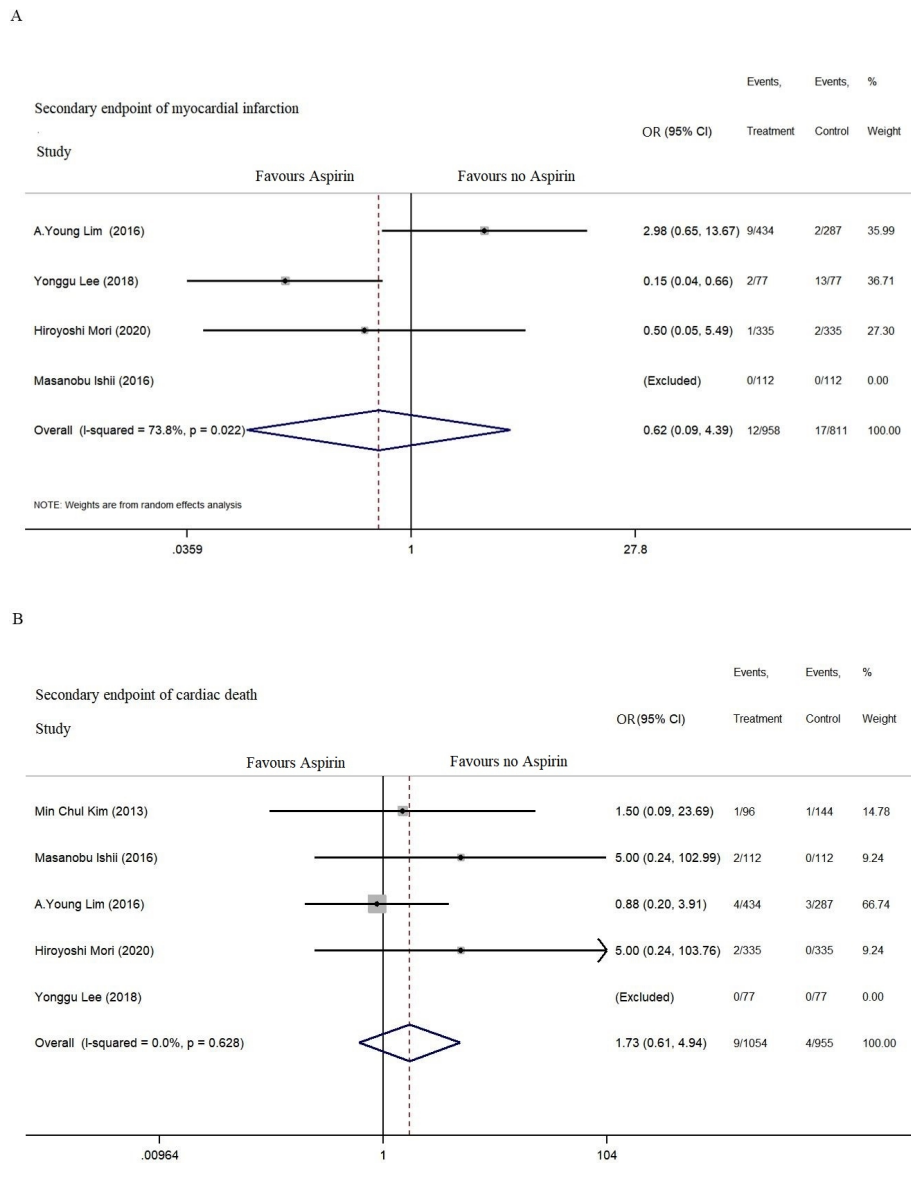

Figure 4. Secondary endpoints including myocardial infarction, cardiac death, and all-cause death during 1–5 years of follow-up.

240x305mm (144 x 144 DPI)

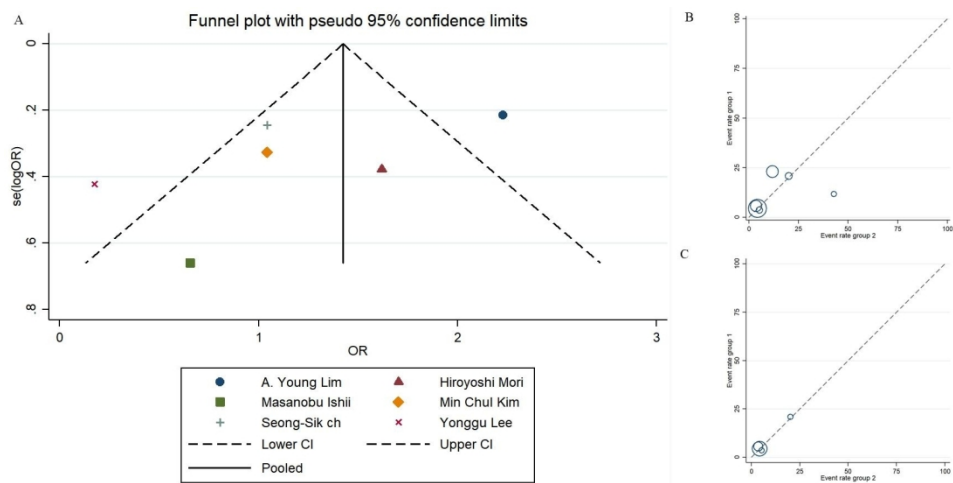

Figure 5. Assess of bias risk of the studies.

477x231mm (96 x 96 DPI)





# PRISMA 2009 Checklist

| Section/topic                      | #  | Checklist item                                                                                                                                                                                                                                                                                              | Reported on page # |
|------------------------------------|----|-------------------------------------------------------------------------------------------------------------------------------------------------------------------------------------------------------------------------------------------------------------------------------------------------------------|--------------------|
| <b>TITLE</b>                       |    |                                                                                                                                                                                                                                                                                                             |                    |
| Title                              | 1  | Identify the report as a systematic review, meta-analysis, or both.                                                                                                                                                                                                                                         | Page 1             |
| <b>ABSTRACT</b>                    |    |                                                                                                                                                                                                                                                                                                             |                    |
| Structured summary                 | 2  | Provide a structured summary including, as applicable: background; objectives; data sources; study eligibility criteria, participants, and interventions; study appraisal and synthesis methods; results; limitations; conclusions and implications of key findings; systematic review registration number. | Page 2             |
| <b>INTRODUCTION</b>                |    |                                                                                                                                                                                                                                                                                                             |                    |
| Rationale                          | 3  | Describe the rationale for the review in the context of what is already known.                                                                                                                                                                                                                              | Page 4             |
| Objectives                         | 4  | Provide an explicit statement of questions being addressed with reference to participants, interventions, comparisons, outcomes, and study design (PICOS).                                                                                                                                                  | Page 4             |
| <b>METHODS</b>                     |    |                                                                                                                                                                                                                                                                                                             |                    |
| Protocol and registration          | 5  | Indicate if a review protocol exists, if and where it can be accessed (e.g., Web address), and, if available, provide registration information including registration number.                                                                                                                               | Page 4-5           |
| Eligibility criteria               | 6  | Specify study characteristics (e.g., PICOS, length of follow-up) and report characteristics (e.g., years considered, language, publication status) used as criteria for eligibility, giving rationale.                                                                                                      | Page 4-5           |
| Information sources                | 7  | Describe all information sources (e.g., databases with dates of coverage, contact with study authors to identify additional studies) in the search and date last searched.                                                                                                                                  | Page 4-5           |
| Search                             | 8  | Present full electronic search strategy for at least one database, including any limits used, such that it could be repeated.                                                                                                                                                                               | Page 4-5           |
| Study selection                    | 9  | State the process for selecting studies (i.e., screening, eligibility, included in systematic review, and, if applicable, included in the meta-analysis).                                                                                                                                                   | Page 4-5           |
| Data collection process            | 10 | Describe method of data extraction from reports (e.g., piloted forms, independently, in duplicate) and any processes for obtaining and confirming data from investigators.                                                                                                                                  | Page 4-5           |
| Data items                         | 11 | List and define all variables for which data were sought (e.g., PICOS, funding sources) and any assumptions and simplifications made.                                                                                                                                                                       | Page 4-5           |
| Risk of bias in individual studies | 12 | Describe methods used for assessing risk of bias of individual studies (including specification of whether this was done at the study or outcome level), and how this information is to be used in any data synthesis.                                                                                      | Page 4-5           |
| Summary measures                   | 13 | State the principal summary measures (e.g., risk ratio, difference in means).                                                                                                                                                                                                                               | Page 4-5           |
| Synthesis of results               | 14 | Describe the methods of handling data and combining results of studies, if done, including measures of consistency (e.g., $I^2$ ) for each meta-analysis.                                                                                                                                                   | Page 4-5           |

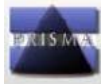

# PRISMA 2009 Checklist

Page 1 of 2

| Section/topic                 | #  | Checklist item                                                                                                                                                                                           | Reported on page # |
|-------------------------------|----|----------------------------------------------------------------------------------------------------------------------------------------------------------------------------------------------------------|--------------------|
| Risk of bias across studies   | 15 | Specify any assessment of risk of bias that may affect the cumulative evidence (e.g., publication bias, selective reporting within studies).                                                             | Page 4-5           |
| Additional analyses           | 16 | Describe methods of additional analyses (e.g., sensitivity or subgroup analyses, meta-regression), if done, indicating which were pre-specified.                                                         | Page 5             |
| <b>RESULTS</b>                |    |                                                                                                                                                                                                          |                    |
| Study selection               | 17 | Give numbers of studies screened, assessed for eligibility, and included in the review, with reasons for exclusions at each stage, ideally with a flow diagram.                                          | Page 6-7           |
| Study characteristics         | 18 | For each study, present characteristics for which data were extracted (e.g., study size, PICOS, follow-up period) and provide the citations.                                                             | Page 6-7           |
| Risk of bias within studies   | 19 | Present data on risk of bias of each study and, if available, any outcome level assessment (see item 12).                                                                                                | Page 6-7           |
| Results of individual studies | 20 | For all outcomes considered (benefits or harms), present, for each study: (a) simple summary data for each intervention group (b) effect estimates and confidence intervals, ideally with a forest plot. | Page 6-7           |
| Synthesis of results          | 21 | Present results of each meta-analysis done, including confidence intervals and measures of consistency.                                                                                                  | Page 6-7           |
| Risk of bias across studies   | 22 | Present results of any assessment of risk of bias across studies (see Item 15).                                                                                                                          | Page 6-7           |
| Additional analysis           | 23 | Give results of additional analyses, if done (e.g., sensitivity or subgroup analyses, meta-regression [see Item 16]).                                                                                    | Page 6-7           |
| <b>DISCUSSION</b>             |    |                                                                                                                                                                                                          |                    |
| Summary of evidence           | 24 | Summarize the main findings including the strength of evidence for each main outcome; consider their relevance to key groups (e.g., healthcare providers, users, and policy makers).                     | Page 7-10          |
| Limitations                   | 25 | Discuss limitations at study and outcome level (e.g., risk of bias), and at review-level (e.g., incomplete retrieval of identified research, reporting bias).                                            | Page 10            |
| Conclusions                   | 26 | Provide a general interpretation of the results in the context of other evidence, and implications for future research.                                                                                  | Page 10            |
| <b>FUNDING</b>                |    |                                                                                                                                                                                                          |                    |
| Funding                       | 27 | Describe sources of funding for the systematic review and other support (e.g., supply of data); role of funders for the systematic review.                                                               | Page 11            |

From: Moher D, Liberati A, Tetzlaff J, Altman DG, The PRISMA Group (2009). Preferred Reporting Items for Systematic Reviews and Meta-Analyses: The PRISMA Statement. PLoS Med 6(6): e1000097. doi:10.1371/journal.pmed1000097

For peer review only, <http://bmjopen.bmj.com/site/about/guidelines.xhtml>  
For more information, visit: [www.prisma-statement.org](http://www.prisma-statement.org)

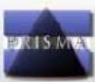

# PRISMA 2009 Checklist

- 1
- 2
- 3
- 4
- 5
- 6
- 7
- 8
- 9
- 10
- 11
- 12
- 13
- 14
- 15
- 16
- 17
- 18
- 19
- 20
- 21
- 22
- 23
- 24
- 25
- 26
- 27
- 28
- 29
- 30
- 31
- 32
- 33
- 34
- 35
- 36
- 37
- 38
- 39
- 40
- 41
- 42
- 43
- 44
- 45
- 46
- 47

For peer review only

# BMJ Open

## Impact of Aspirin Use on Clinical Outcomes in Patients With Vasospastic Angina: A Systematic Review and Meta-analysis

|                                 |                                                                                                                                                                                                                                                                                                                                                                                                                        |
|---------------------------------|------------------------------------------------------------------------------------------------------------------------------------------------------------------------------------------------------------------------------------------------------------------------------------------------------------------------------------------------------------------------------------------------------------------------|
| Journal:                        | <i>BMJ Open</i>                                                                                                                                                                                                                                                                                                                                                                                                        |
| Manuscript ID                   | bmjopen-2021-048719.R3                                                                                                                                                                                                                                                                                                                                                                                                 |
| Article Type:                   | Original research                                                                                                                                                                                                                                                                                                                                                                                                      |
| Date Submitted by the Author:   | 03-Jul-2021                                                                                                                                                                                                                                                                                                                                                                                                            |
| Complete List of Authors:       | lin, yaowang; Shenzhen People's Hospital, Department of Cardiology<br>chen, yang; Guangdong Medical University, School of Pharmacy<br>yuan, jie; Shenzhen People's Hospital, Department of Cardiology<br>Qin, Haiyan; Shenzhen People's Hospital, Department of Emergency<br>dong, shaohong; Shenzhen People's Hospital, Department of Cardiology<br>chen, qiuling; Shenzhen People's Hospital, Department of Pharmacy |
| <b>Primary Subject Heading</b>: | Medical management                                                                                                                                                                                                                                                                                                                                                                                                     |
| Secondary Subject Heading:      | Cardiovascular medicine                                                                                                                                                                                                                                                                                                                                                                                                |
| Keywords:                       | Coronary heart disease < CARDIOLOGY, Myocardial infarction < CARDIOLOGY, Vascular medicine < INTERNAL MEDICINE                                                                                                                                                                                                                                                                                                         |
|                                 |                                                                                                                                                                                                                                                                                                                                                                                                                        |

SCHOLARONE™  
Manuscripts



I, the Submitting Author has the right to grant and does grant on behalf of all authors of the Work (as defined in the below author licence), an exclusive licence and/or a non-exclusive licence for contributions from authors who are: i) UK Crown employees; ii) where BMJ has agreed a CC-BY licence shall apply, and/or iii) in accordance with the terms applicable for US Federal Government officers or employees acting as part of their official duties; on a worldwide, perpetual, irrevocable, royalty-free basis to BMJ Publishing Group Ltd ("BMJ") its licensees and where the relevant Journal is co-owned by BMJ to the co-owners of the Journal, to publish the Work in this journal and any other BMJ products and to exploit all rights, as set out in our [licence](#).

The Submitting Author accepts and understands that any supply made under these terms is made by BMJ to the Submitting Author unless you are acting as an employee on behalf of your employer or a postgraduate student of an affiliated institution which is paying any applicable article publishing charge ("APC") for Open Access articles. Where the Submitting Author wishes to make the Work available on an Open Access basis (and intends to pay the relevant APC), the terms of reuse of such Open Access shall be governed by a Creative Commons licence – details of these licences and which [Creative Commons](#) licence will apply to this Work are set out in our licence referred to above.

Other than as permitted in any relevant BMJ Author's Self Archiving Policies, I confirm this Work has not been accepted for publication elsewhere, is not being considered for publication elsewhere and does not duplicate material already published. I confirm all authors consent to publication of this Work and authorise the granting of this licence.

1  
2  
3  
4 **Impact of Aspirin Use on Clinical Outcomes in Patients with Vasospastic Angina:**  
5  
6 **A Systematic Review and Meta-analysis**  
7  
8

9 Yaowang Lin, MD <sup>1,4</sup>; Yang Chen, MD <sup>5</sup>; Jie Yuan, MD <sup>1,4</sup>; Haiyan Qin, MD <sup>2,4</sup>;  
10  
11 Shaohong Dong, MD <sup>1,4#</sup>; Qiuling Chen, MD <sup>3,4#</sup>  
12  
13

14  
15 **Author Affiliations:**  
16

17  
18 <sup>1</sup>Department of Cardiology; <sup>2</sup>Department of Health Management; <sup>3</sup>Department of  
19  
20 Pharmacy; <sup>4</sup>Shenzhen People's Hospital, Second Clinical Medical College of Jinan  
21  
22 University, First affiliated Hospital of South University of Science and Technology,  
23  
24 Shenzhen, Guangdong. No. 1017, Dongmen Northern Road, 518020, Shenzhen,  
25  
26 Guangdong, PR China. <sup>5</sup>School of Pharmacy, Guangdong Medical University,  
27  
28 Dongguan 523808, Guangdong, China  
29  
30  
31  
32

33 **Correspondence should be addressed to Shaohong Dong and Qiuling Chen**  
34  
35

36  
37 Shaohong Dong, MD, e-mail: xnkds@yeah.net  
38  
39

40  
41 Qiuling Chen, MD, e-mail: szchenqiuling@yeah.net  
42  
43  
44  
45  
46  
47  
48  
49  
50  
51  
52  
53  
54  
55  
56  
57  
58  
59  
60

## ABSTRACT

**Objectives:** The use of aspirin to prevent cardiovascular disease in vasospastic angina (VSA) patients without significant stenosis has yet to be investigated. This study aimed to investigate the efficacy of aspirin use among VSA patients.

**Design:** Systematic review and meta-analysis.

**Data sources:** PubMed, Web of Science, and Cochrane Central Register of Controlled Trials were searched for relevant information prior to October 2020.

**Eligibility criteria for selecting studies:** Aspirin use versus no aspirin use (placebo or no treatment) among VSA patients without significant stenosis.

**Data extraction and synthesis:** Two investigators extracted the study data. Odds ratios (ORs) and 95% confidence intervals (CIs) were calculated and graphed as forest plots. The Newcastle-Ottawa Quality Assessment Scale tool and Begg's funnel plot were used to assess risk of bias.

**Results:** Four propensity-matched cohorts, one retrospective analysis, and one prospective multicenter cohort, in total comprising 3,661 patients (aspirin use group,  $n$

1  
2  
3  
4 = 1,695; no aspirin use group,  $n = 1,966$ ) were included in this meta-analysis. Aspirin  
5  
6 use and the incidence of major cardiovascular adverse events with follow-up of 1–5  
7  
8 years were not significantly correlated (combined OR = 0.90, 95% CI: 0.55–1.68,  $p =$   
9  
10 0.829,  $I^2 = 82.2\%$ ; subgroup analysis: OR = 1.09, 95% CI: 0.81–1.47,  $I^2 = 0\%$ ). No  
11  
12 significant difference was found between aspirin use and the incidence of myocardial  
13  
14 infarction (OR = 0.62, 95% CI: 0.09–4.36,  $p = 0.615$ ,  $I^2 = 73.8\%$ ) or cardiac death (OR  
15  
16 = 1.73, 95% CI: 0.61–4.94,  $p = 0.444$ ,  $I^2 = 0\%$ ) during follow-up.  
17  
18  
19  
20  
21  
22

23 **Conclusion:** Aspirin use may not reduce the risk of future cardiovascular events in  
24  
25 VSA patients without significant stenosis.  
26  
27  
28  
29  
30  
31  
32

33 **Trial registration number:** PROSPERO (CRD42020214891)  
34  
35  
36  
37  
38  
39  
40  
41  
42  
43  
44  
45  
46  
47  
48  
49  
50  
51  
52  
53  
54  
55  
56  
57  
58  
59  
60

39 **Keywords:** Aspirin, Vasospastic angina, MACE, Cardiac death, Myocardial infarction,  
40  
41  
42 Long-term follow-up  
43  
44  
45  
46  
47  
48  
49  
50  
51  
52  
53  
54  
55  
56  
57  
58  
59  
60



1  
2  
3  
4  
5  
6  
7  
8  
9  
10  
11  
12  
13  
14  
15  
16  
17  
18  
19  
20  
21  
22  
23  
24  
25  
26  
27  
28  
29  
30  
31  
32  
33  
34  
35  
36  
37  
38  
39  
40  
41  
42  
43  
44  
45  
46  
47  
48  
49  
50  
51  
52  
53  
54  
55  
56  
57  
58  
59  
60

### **Strengths and limitations of this study**

- ▶ This is the first meta-analysis to evaluate the impact of aspirin use on clinical outcomes in patients with VSA.
- ▶ The therapeutic drug used in the study by Mori (2020) is an antiplatelet drug that includes aspirin and P2Y12 inhibitors.
- ▶ The limitations inherent to multi-center observational studies performed in both retrospective and prospective manners may have affected data analysis.
- ▶ The conclusions of this study should be verified with randomized controlled trials

1  
2  
3  
4 with a larger sample size.  
5  
6  
7  
8  
9  
10  
11  
12  
13  
14  
15  
16  
17  
18  
19  
20  
21  
22  
23  
24  
25  
26  
27  
28  
29  
30  
31  
32  
33  
34  
35  
36  
37  
38  
39  
40  
41  
42  
43  
44  
45  
46  
47  
48  
49  
50

## 51 **INTRODUCTION**

52  
53  
54  
55 Coronary spasm characterized by vasospastic angina (VSA) is one cause of ischemia in  
56  
57  
58 a non-obstructive coronary artery (INOCA) [1, 2]. VSA patients who also suffer from  
59  
60

1  
2  
3  
4 endothelial dysfunction or coronary atherosclerosis commonly use aspirin [3, 4], per  
5  
6 the guidelines of the European Society of Cardiology (ESC), for the management of  
7  
8 chronic stable angina and acute coronary syndromes [5, 6].  
9  
10

11  
12 The ASCEND study showed that the use of low-dose aspirin leads to a lower risk  
13  
14 of serious vascular events (8.5% vs. 9.6%;  $p = 0.01$ ) compared to placebo among  
15  
16 persons with diabetes in primary treatment, but the absolute benefits of aspirin are  
17  
18 largely counterbalanced by the bleeding hazard (4.1% vs. 3.2%;  $p = 0.003$ ) [7]. The  
19  
20 ARRIVE study also suggested that aspirin use may result in a higher incidence of  
21  
22 gastrointestinal bleeding (0.97% vs. 0.46%;  $p = 0.0007$ ) or overall incidence of  
23  
24 treatment-related adverse events (16.75% vs. 13.54%;  $p < 0.0001$ ) compared to control  
25  
26 groups [8]. Owing to the latest controversy and reduced usage of aspirin in preventing  
27  
28 cardiovascular events [9, 10], aspirin's efficiency in VSA patients without significant  
29  
30 stenosis has not yet been reported [11-16]. Therefore, this meta-analysis was designed  
31  
32 to assess the correlation between aspirin use and cardiovascular events and cardiac  
33  
34 death among VSA patients during long-term follow-up.  
35  
36  
37  
38  
39  
40  
41  
42  
43  
44  
45  
46  
47

## 48 **MATERIALS AND METHODS**

### 49 *Search strategy*

50  
51  
52 A comprehensive search of PubMed, Web of Science, and Cochrane Central Register  
53  
54 of Controlled Trials databases for related research articles conducted before October  
55  
56 2020 was conducted to gather data. The keywords were “vasospastic angina”,  
57  
58  
59  
60

1  
2  
3  
4 “coronary vasospasms”, “vasospasm”, “variant angina”, “Prinzmetal's variant angina”,  
5  
6 “spastic coronary angina”, “coronary artery spasm,” as well as “aspirin” and  
7  
8 “antiplatelet therapy”. Certain additional related publications, such as review articles  
9  
10 and editorials, were also assessed. This study was registered with PROSPERO  
11  
12 (CRD42020214891).  
13  
14  
15  
16  
17  
18  
19  
20

### 21 ***Patient and public involvement***

22  
23  
24 Study participants met the eligibility criteria as outlined above. All included patients  
25  
26 were diagnosed with epicardial coronary vasospasms by provocation test. Participants  
27  
28 and other members of the public were not involved in the recruitment, design, conduct,  
29  
30 reporting, or dissemination of this study.  
31  
32  
33  
34  
35  
36  
37  
38

### 39 ***Study selection and data extraction***

40  
41  
42 The patient inclusion criteria were as follows: (i) diagnosed with VSA on provocation  
43  
44 test, (ii) absence of significant stenosis ( $\leq 50\%$ ), (iii) the treatment group was  
45  
46 administered oral aspirin and the control group received no aspirin or placebo, and (iv)  
47  
48 articles published in English. The exclusion criteria were as follows: significant stenosis  
49  
50 ( $\geq 50\%$ ), intravenous aspirin, case report, and case series. The study data were  
51  
52 independently extracted by two investigators, namely Lin and Chen, using pre-defined  
53  
54 extraction forms; any conflict was resolved by a third reviewer.  
55  
56  
57  
58  
59  
60

### ***Data analysis and risk of bias assessment***

Major cardiovascular adverse events (MACE) were the primary endpoints, while myocardial infarction (MI) and cardiac death during follow-up were the secondary endpoints. MACE have been described as cardiac death, acute coronary syndrome, and hospitalization due to unstable angina, percutaneous coronary intervention, symptomatic arrhythmia, appropriate implantable cardioverter defibrillator (ICD), and shock. The Newcastle-Ottawa Quality Assessment Scale (NOS) tool was utilized to assess the risk of bias, and Begg's funnel plot was used to evaluate publication bias.

### ***Statistical analysis***

STATA software (version 14.0; StataCorp, College Station, TX, USA) was used for the meta-analysis. MACE (primary endpoints) and MI and cardiac death (secondary endpoints) were evaluated as combined odds ratios (ORs) with 95% confidence intervals (CIs). Heterogeneity between studies was derived using the  $I^2$  statistic. If  $I^2 > 50\%$ , the random effect model was used to assess heterogeneity; if  $I^2 < 50\%$ , the fixed effect model was utilized to evaluate heterogeneity. Subgroups were studied to reduce the heterogeneity if  $I^2 > 50\%$ .  $P$  values  $< 0.05$  were considered statistically significant.

## **RESULTS**

### ***Characteristics of included studies***

The search engines were reviewed to identify 3,645 related studies, among which 1,303 articles were duplicates and 2,414 articles did not fulfill the inclusion criteria and were excluded from the study. After removing these studies, 4 propensity-matched cohorts [11,13,14,16], 1 retrospective analysis [12], and 1 prospective multicenter cohort [15] (Figure 1), including a total of 3,661 patients (aspirin group,  $n = 1,695$ ; no aspirin group,  $n = 1,966$ , Table 1) were included in the study. Four studies underwent coronary provocation test, except for 1 study (Seong-Sik Cho, 2019) that used the electrocardiograph provocation test. All studies provided a primary endpoint, with follow-up durations ranging from 1 to 5 years (Table 2).

### ***Primary and secondary endpoints***

No significant correlation was recorded between aspirin use and MACE incidence within the follow-up of 1–5 years (combined OR = 0.90, 95% CI: 0.55–1.68,  $p = 0.829$ ,  $I^2 = 82.2\%$  [Figure 2]; subgroup analysis: OR = 0.89, 95% CI: 0.40–2.02,  $I^2 = 86.9\%$  and OR = 1.09, 95% CI: 0.81–1.47,  $I^2 = 0\%$ , [Figure 3A and B]).

MI was reported in 4 studies, and cardiac death was reported in 5 studies for the secondary endpoint. No significant difference was found between aspirin use and the incidence of MI (OR = 0.62, 95% CI: 0.09–4.36,  $p = 0.615$ ,  $I^2 = 73.8\%$ ) or cardiac death (OR = 1.73, 95% CI: 0.61–4.94,  $p = 0.444$ ,  $I^2 = 0\%$ ) during the follow-up (Figure 4).

### ***Risk of bias assessment and heterogeneity analysis***

The NOS scores for study quality assessment of the included studies ranged from 7 to 9 (Table 3). Publication bias is presented by asymmetry in the funnel plot (Figure 5). Between-study heterogeneity in MACE-related research was 82.2% and 86.9%. Therefore, the outcome of subgroup analyses of  $I^2$  was 0%, indicating low publication bias (Figure 3). The between-study heterogeneities in MI and cardiac death-related studies were 73.8% and 0%, respectively, indicating the occurrence of high publication bias for the MI endpoint (Figure 4).

## **DISCUSSION**

Our meta-analysis showed that aspirin had no significant effect on reducing MACE, MI, and cardiac death in VSA patients without significant stenosis.

Coronary artery spasm (CAS) has been reported to play a significant role in the pathogenesis of ischemic heart disease, including acute coronary syndrome and chronic coronary syndrome [17]. A common mechanism by which MI or MINOCA manifests is platelet aggregation, which leads to coronary thrombus formation. Aspirin inhibits cyclooxygenase-1 by reducing the production of thromboxane A2 and therefore has been extensively used in primary or secondary prevention of thrombosis among patients with atherosclerosis or coronary artery disease [18, 19]. However, the benefit of low dosage aspirin in primary prevention was counterbalanced by higher rates of treatment-related adverse events [7, 8]. Earlier studies have shown that aspirin use can aggravate

1  
2  
3  
4 CAS due to the lowered production of thromboxane A2 and increased MACE incidence  
5  
6 in VSA patients [20, 21]. Thus, the use of aspirin in VSA patients remains controversial.  
7  
8  
9

10 MACE incidence in patients administered low-dose aspirin was significantly higher  
11  
12 than that among patients not administered aspirin (hazard ratio [HR] = 1.54; CI: 1.04-  
13 2.28;  $p = 0.037$ ) during a 52-month median follow-up period [13]. In contrast, MI (HR  
14  
15 = 0.13; CI: 0.03–0.61;  $p = 0.014$ ) and chest pain recurrence (HR = 0.29; CI: 0.12–0.71;  
16  
17  $p = 0.006$ ) were observed by Lee *et al.* to have been significantly reduced by aspirin  
18  
19 use among VSA patients during follow-up [11]. Lee *et al.* showed that acute intimal  
20  
21 tears and erosion identified by optical coherence tomography are susceptible to  
22  
23 thrombosis leading to MI. Therefore, aspirin was evidenced to reduce adverse events in  
24  
25 VSA patients with a greater number of thrombotic intracoronary lesions. Nevertheless,  
26  
27 aspirin use was not significantly correlated with the occurrence of cardiovascular events  
28  
29 among VSA patients with nonsignificant stenosis during a 49-month mean follow-up  
30  
31 period ( $p = 0.541$ ) [14]. Moreover, the aspirin-treated group exhibited a similar MACE  
32  
33 incidence compared with the non-antiplatelet agent group (HR = 0.96, CI: 0.59–1.55,  $p$   
34  
35 = 0.872) as reported by Cho *et al.* [15]. Antiplatelet therapy was recently shown by  
36  
37 Mori *et al.* to have no beneficial effects on MACE (5.7% vs. 3.6%,  $p = 0.20$ ) among  
38  
39 VSA patients during a 32-month median follow-up period [16].  
40  
41  
42  
43  
44  
45  
46  
47  
48  
49  
50  
51

52 Our meta-analysis indicates that aspirin use may not be linked to a lower risk of  
53  
54 MACE and cardiac death. The subgroup analysis of MACE indicated that the studies  
55  
56 by Lee [11] and Lim [13] were heterogeneous. The origin of heterogeneity in these  
57  
58 studies may be attributable to chest pain recurrence in the MACE, which results in an  
59  
60



1  
2  
3  
4 entirely different outcome due to the definition. The following may potentially explain  
5  
6 the lack of beneficial effects of aspirin use: (i) Aspirin use is known to damage the  
7  
8 gastric mucosal barrier and increase risk of erosions, ulcers, and bleeding by inhibiting  
9  
10 cyclooxygenase-1 enzyme activity [22]. Several meta-analyses have indicated that  
11  
12 aspirin's efficacy in primary prevention of cardiovascular disease should be weighed  
13  
14 against any increase in major bleeding [23-25]. (ii) The adverse effects of asthma and  
15  
16 dyspnea may lead to CAS and increase the occurrence of MACE or cardiogenic death  
17  
18 with aspirin use [26, 27]. (iii) The synthesis of prostacyclin, a well-known vasodilator  
19  
20 released by endothelial cells, is inhibited by aspirin [28] and CAS is induced by aspirin.  
21  
22 This could, in turn, cause recurrent angina leading to rehospitalization, MI, and cardiac  
23  
24 death.  
25  
26  
27  
28  
29  
30  
31  
32

33 We found that aspirin use may have a protective effect against MI, which may be  
34  
35 explained by aspirin's pharmacological mechanism. However, there was high  
36  
37 heterogeneity in the study, which may be attributed to the lack of related studies and a  
38  
39 different definition of MI used by Mori *et al.* [16]. Aspirin use in CAS patients can be  
40  
41 both advantageous and disadvantageous. Further investigation is necessary to  
42  
43 determine when to recommend aspirin use.  
44  
45  
46  
47  
48  
49

50 Several potential limitations should be considered in this meta-analysis. First,  
51  
52 MACE and MI were defined differently in the included articles. Due to the lack of  
53  
54 original data, no standard definition of MACE was accessible in this meta-analysis.  
55  
56 Second, one study by Mori *et al.* (2020) showed that an antiplatelet drug containing  
57  
58 both aspirin and P2Y12 inhibitors was used as the treatment strategy. Third, the sample  
59  
60

1  
2  
3  
4 size in this analysis is too small; only a few studies conducted propensity matching  
5  
6 analysis to balance baseline characteristics. The limitations inherent to multi-center  
7  
8 observational studies performed in both retrospective and prospective manners could  
9  
10 not be avoided in this analysis. Fourth, patients with 40% stenosis are considered to  
11  
12 have VSA without coronary stenosis but might benefit from aspirin. Subgroup analysis  
13  
14 should be performed in the next study. Finally, the major bleeding outcome was  
15  
16 excluded from this study, which is essential for understanding the advantages of  
17  
18 antiplatelet therapy. Despite these limitations, the merit of this study is that it is the first  
19  
20 to evaluate the prognosis of VSA patients using low-dose aspirin.  
21  
22  
23  
24  
25  
26  
27  
28  
29  
30

## 31 **CONCLUSIONS**

32  
33  
34 Aspirin use may not reduce the risk of cardiovascular events in VSA patients without  
35  
36 significant stenosis. Owing to its potential adverse effects, regular use of aspirin in VSA  
37  
38 patients without significant stenosis should involve a thoughtful discussion.  
39  
40  
41  
42  
43  
44  
45  
46

## 47 **Acknowledgments**

48  
49 None  
50  
51

## 52 **Contributors**

53  
54  
55  
56 YWL, QLC, and HYQ conceived, designed, and led the study. YWL, YC, YJ, and SHD  
57  
58 investigated, conducted the study, and collected data. YWL, SHD, and QLC wrote,  
59  
60

1  
2  
3 revised, and edited the manuscript. All authors supervised the study and approved the  
4  
5 final version of the manuscript.  
6  
7

### 8 **Funding**

9  
10  
11 This study was supported by a grant from the Shenzhen Key Medical Discipline  
12  
13 Construction Fund (No. SZXK003 and No. SZXK059) and Sanming Project of  
14  
15 Medicine in Shenzhen (No. SZSM201412012).  
16  
17

### 18 **Conflict of interest**

19  
20  
21 No conflict of interest  
22  
23

### 24 **Patient consent for publication**

25  
26  
27 Not required  
28  
29

### 30 **Provenance and peer review**

31  
32  
33 Not commissioned; externally peer reviewed.  
34  
35

### 36 **Data availability statement**

37  
38  
39 All data relevant to the study are included in the article or uploaded as supplementary  
40  
41 information.  
42  
43

### 44 **ORCID iD**

45  
46  
47 Yaowang Lin: <https://orcid.org/0000-0002-4075-4259>  
48  
49

### 50 **Ethics Statement**

51  
52  
53 The institutional review board at the Shenzhen People's Hospital approved the study  
54  
55 protocol.  
56  
57  
58  
59  
60

## REFERENCES

1. Montone RA, Niccoli G, Fracassi F, *et al.* Patients with acute myocardial infarction and non-obstructive coronary arteries: safety and prognostic relevance of invasive coronary provocative tests. *Eur Heart J* 2018, 39(2):91-98.
2. Kunadian V, Chieffo A, Camici PG, *et al.* An EAPCI Expert Consensus Document on Ischaemia with Non-Obstructive Coronary Arteries in Collaboration with European Society of Cardiology Working Group on Coronary Pathophysiology & Microcirculation Endorsed by Coronary Vasomotor Disorders International Study Group. *Eur Heart J* 2020, 41(37):3504-3520.
3. Lee BK, Lim HS, Fearon WF, *et al.* Invasive evaluation of patients with angina in the absence of obstructive coronary artery disease. *Circulation* 2015, 131(12):1054-1060.

- 1  
2  
3  
4 4. Khuddus MA, Pepine CJ, Handberg EM, *et al.* An intravascular ultrasound  
5  
6 analysis in women experiencing chest pain in the absence of obstructive  
7  
8 coronary artery disease: a substudy from the National Heart, Lung and Blood  
9  
10 Institute-Sponsored Women's Ischemia Syndrome Evaluation (WISE). *J Interv*  
11  
12 *Cardiol* 2010, 23(6):511-519.  
13  
14
- 15  
16  
17  
18 5. Knuuti J, Wijns W, Saraste A, *et al.* 2019 ESC Guidelines for the diagnosis and  
19  
20 management of chronic coronary syndromes. *Eur Heart J* 2020, 41(3):407-477.  
21  
22
- 23  
24 6. Collet JP, Thiele H, Barbato E, *et al.* 2020 ESC Guidelines for the management  
25  
26 of acute coronary syndromes in patients presenting without persistent ST-  
27  
28 segment elevation. *Eur Heart J* 2020.  
29  
30
- 31  
32 7. Group ASC, Bowman L, Mafham M, *et al.* Effects of Aspirin for Primary  
33  
34 Prevention in Persons with Diabetes Mellitus. *N Engl J Med* 2018,  
35  
36 379(16):1529-1539.  
37  
38
- 39  
40  
41 8. Gaziano JM, Brotons C, Coppolecchia R, *et al.* Use of aspirin to reduce risk of  
42  
43 initial vascular events in patients at moderate risk of cardiovascular disease  
44  
45 (ARRIVE): a randomised, double-blind, placebo-controlled trial. *Lancet* 2018,  
46  
47 392(10152):1036-1046.  
48  
49
- 50  
51  
52 9. Guirguis-Blake JM, Evans CV, Senger CA, *et al.* Aspirin for the Primary  
53  
54 Prevention of Cardiovascular Events: A Systematic Evidence Review for the  
55  
56 U.S . Preventive Services Task Force. *Ann Intern Med* 2016, 164(12):804-813.  
57  
58  
59  
60

- 1  
2  
3  
4 10. Zheng SL, Roddick AJ. Association of Aspirin Use for Primary Prevention With  
5  
6 Cardiovascular Events and Bleeding Events: A Systematic Review and Meta-  
7  
8 analysis. *Jama* 2019, 321(3):277-287.  
9  
10
- 11  
12 11. Lee Y, Park HC, Shin J. Clinical efficacy of aspirin with identification of intimal  
13  
14 morphology by optical coherence tomography in preventing event recurrence in  
15  
16 patients with vasospasm-induced acute coronary syndrome. *Int J Cardiovasc*  
17  
18 *Imaging* 2018, 34(11):1697-1706.  
19  
20
- 21  
22 12. Kim MC, Ahn Y, Park KH, *et al.* Clinical outcomes of low-dose aspirin  
23  
24 administration in patients with variant angina pectoris. *Int J Cardiol* 2013,  
25  
26 167(5):2333-2334.  
27  
28
- 29  
30 13. Lim AY, Park TK, Cho SW, *et al.* Clinical implications of low-dose aspirin on  
31  
32 vasospastic angina patients without significant coronary artery stenosis; a  
33  
34 propensity score-matched analysis. *Int J Cardiol* 2016, 221:161-166.  
35  
36
- 37  
38 14. Ishii M, Kaikita K, Sato K, *et al.* Impact of aspirin on the prognosis in patients  
39  
40 with coronary spasm without significant atherosclerotic stenosis. *Int J Cardiol*  
41  
42 2016, 220:328-332.  
43  
44
- 45  
46 15. Cho SS, Jo SH, Han SH, *et al.* Clopidogrel plus Aspirin Use is Associated with  
47  
48 Worse Long-Term Outcomes, but Aspirin Use Alone is Safe in Patients with  
49  
50 Vasospastic Angina: Results from the VA-Korea Registry, A Prospective Multi-  
51  
52 Center Cohort. *Sci Rep* 2019, 9(1):17783.  
53  
54  
55  
56  
57  
58  
59  
60

- 1  
2  
3  
4 16. Mori H, Takahashi J, Sato K, *et al.* The impact of antiplatelet therapy on patients  
5  
6 with vasospastic angina: A multicenter registry study of the Japanese Coronary  
7  
8 Spasm Association. *Int J Cardiol Heart Vasc* 2020, 29:100561.  
9  
10  
11  
12 17. Yasue H, Mizuno Y, Harada E. Coronary artery spasm - Clinical features,  
13  
14 pathogenesis and treatment. *Proc Jpn Acad Ser B Phys Biol Sci* 2019, 95(2):53-  
15  
16 66.  
17  
18  
19  
20 18. Capodanno D, Alfonso F, Levine GN, *et al.* ACC/AHA Versus ESC Guidelines  
21  
22 on Dual Antiplatelet Therapy: JACC Guideline Comparison. *J Am Coll Cardiol*  
23  
24 2018, 72(23 Pt A):2915-2931.  
25  
26  
27  
28 19. Valgimigli M, Bueno H, Byrne RA, *et al.* 2017 ESC focused update on dual  
29  
30 antiplatelet therapy in coronary artery disease developed in collaboration with  
31  
32 EACTS: The Task Force for dual antiplatelet therapy in coronary artery disease  
33  
34 of the European Society of Cardiology (ESC) and of the European Association  
35  
36 for Cardio-Thoracic Surgery (EACTS). *Eur Heart J* 2018, 39(3):213-260.  
37  
38  
39  
40 20. Picard F, Sayah N, Spagnoli V, *et al.* Vasospastic angina: A literature review of  
41  
42 current evidence. *Arch Cardiovasc Dis* 2019, 112(1):44-55.  
43  
44  
45  
46  
47  
48 21. Miwa K, Kambara H, Kawai C. Effect of aspirin in large doses on attacks of  
49  
50 variant angina. *Am Heart J* 1983, 105(2):351-355.  
51  
52  
53  
54  
55 22. Iwamoto J, Saito Y, Honda A, *et al.* Clinical features of gastroduodenal injury  
56  
57 associated with long-term low-dose aspirin therapy. *World J Gastroenterol*  
58  
59  
60

- 1  
2  
3  
4 2013, 19(11):1673-1682.  
5  
6  
7  
8 23. Antithrombotic Trialists C, Baigent C, Blackwell L, *et al.* Aspirin in the primary  
9  
10 and secondary prevention of vascular disease: collaborative meta-analysis of  
11  
12 individual participant data from randomised trials. *Lancet* 2009,  
13  
14 373(9678):1849-1860.  
15  
16  
17  
18 24. Xie W, Luo Y, Liang X, *et al.* The Efficacy And Safety Of Aspirin As The  
19  
20 Primary Prevention Of Cardiovascular Disease: An Updated Meta-Analysis.  
21  
22 *Ther Clin Risk Manag* 2019, 15:1129-1140.  
23  
24  
25  
26  
27 25. Whitlock EP, Burda BU, Williams SB, *et al.* Bleeding Risks With Aspirin Use  
28  
29 for Primary Prevention in Adults: A Systematic Review for the U.S. Preventive  
30  
31 Services Task Force. *Ann Intern Med* 2016, 164(12):826-835.  
32  
33  
34  
35  
36 26. Hangouche AJE, Lamliki O, Oukerraj L, *et al.* Kounis syndrome induced by  
37  
38 oral intake of aspirin: case report and literature review. *Pan Afr Med J* 2018,  
39  
40 30:301.  
41  
42  
43  
44 27. Shah NH, Schneider TR, DeFaria Yeh D, *et al.* Eosinophilia-Associated  
45  
46 Coronary Artery Vasospasm in Patients with Aspirin-Exacerbated Respiratory  
47  
48 Disease. *J Allergy Clin Immunol Pract* 2016, 4(6):1215-1219.  
49  
50  
51  
52  
53 28. Bates ER, Lau WC. Controversies in antiplatelet therapy for patients with  
54  
55 cardiovascular disease. *Circulation* 2005, 111(17):e267-271.  
56  
57  
58  
59  
60



1  
2  
3  
4  
5  
6  
7  
8  
9  
10  
11  
12  
13  
14  
15  
16  
17  
18  
19  
20  
21  
22  
23  
24  
25  
26  
27  
28  
29  
30  
31  
32  
33  
34  
35  
36  
37  
38  
39  
40  
41  
42  
43  
44  
45  
46  
47  
48  
49  
50  
51  
52  
53  
54  
55  
56  
57  
58  
59  
60

For peer review only

**Table 1. Clinical characteristics of patients in included studies.**

| Characteristics             | Min Chul Kim | Masanobu Ishii                          | A. Young Lim                           | Yonggu Lee                         | Seong-Sik Cho                           | Hiroyoshi Mori                            |
|-----------------------------|--------------|-----------------------------------------|----------------------------------------|------------------------------------|-----------------------------------------|-------------------------------------------|
| Aspirin vs. no              | 2013         | 2016                                    | 2016                                   | 2018                               | 2019                                    | 2020                                      |
| Age<br>(year)               | /            | 66.0 ± 9.5 vs. 67.0 ± 8.4,<br>p = 0.428 | 49.0–62.0 vs. 49.0–62.5,<br>p = 0.61   | 51.3±6.7 vs. 50.8±7.5,<br>p = 0.70 | 57.2±11.2 vs. 53.5±11.3,<br>p = 0.001   | 65.4 ± 9.9 vs. 66.7± 10.3,<br>p = 0.07    |
| Males,<br>n (%)             | /            | 47 (42.0) vs. 47 (42.0),<br>p = 1.000   | 359 (82.7) vs. 243 (84.7),<br>p = 0.49 | 60 (78) vs. 55 (71),<br>p = 0.354  | 412 (64.3) vs. 590 (58.4),<br>p = 0.055 | 247 (73.7%) vs. 253 (75.5%) ,<br>p = 0.66 |
| Hypertension,<br>n (%)      | /            | 52 (46.4) vs. 57 (50.9),<br>p = 0.504   | 156 (36.0) vs. 104 (36.2),<br>p = 0.96 | 22 (29) vs. 20 (26),<br>p = 0.717  | 294 (45.9) vs. 320 (31.7),<br>p = 0.001 | 158 (47.2%) vs. 166 (49.6%) ,<br>p = 0.59 |
| Diabetes mellitus,<br>n (%) | /            | 26 (23.2) vs. 27 (24.1),<br>p = 0.875   | 98 (22.6) vs. 66 (23.0),<br>p = 0.91   | 17 (22) vs. 16 (19),<br>p = 0.547  | 73 (11.4) vs. 83(8.2),<br>p = 0.037     | 56 (16.7%) vs. 56 (16.7%),<br>p = 1.00    |
| Smoking,<br>n (%)           | /            | 59 (52.7) vs. 52 (46.4),<br>p = 0.350   | 127 (29.3) vs. 87 (30.3),<br>p = 0.78  | 55 (71) vs. 57 (74),<br>p = 0.717  | 183 (28.9) vs. 250(24.7),<br>p = 0.005  | 202 (60.3%) vs. 202 (60.3%),<br>p = 1.00  |

|                     |   |                           |                             |                      |                            |                               |
|---------------------|---|---------------------------|-----------------------------|----------------------|----------------------------|-------------------------------|
| Dyslipidemia,       | / | 62 (55.4) vs. 60 (53.6) , | 91 (21.0) vs. 62 (21.6),    | /                    | 98 (15.4) vs.160(15.8) ,   | 156 (46.6%) vs. 142 (42.4%) , |
| n (%)               |   | p = 0.788                 | p = 0.84                    |                      | p = 0.800                  | p = 0.31                      |
| Ca channel blocker, | / | 104 (92.9) vs. 101        | 420 (96.9) vs. 275 (95.8),  | 50 (65) vs. 48 (62), | 152 (24.2) vs. 162(16.12), | 316 (94.3%) vs. 313 (93.4%),  |
| n (%)               |   | (90.2) ,                  | p = 0.46                    | p = 0.738            | p = 0.001                  | p = 0.75                      |
|                     |   | p = 0.472                 |                             |                      |                            |                               |
| Statin,             | / | 38 (33.9) vs. 40 (35.7),  | 182 (42.0) vs. 113 (39.4) , | /                    | 123 (19.7) vs. 119(11.9),  | 103 (30.7%) vs. 95 (28.4%),   |
| n (%)               |   | p = 0.779                 | p = 0.49                    |                      | p = 0.001                  | p = 0.55                      |
| ACEI / ARB,         | / | 33(29.5) vs. 25 (22.3),   | 69 (15.9) vs. 43 (15.0) ,   | /                    | 152 (24.3) vs.126(12.6),   | 73 (21.8%) vs. 71 (21.2%) ,   |
| n (%)               |   | p = 0.288                 | p = 0.74                    |                      | p = 0.001                  | p = 0.93                      |
| Beta-blocker,       | / | 6 (5.4) vs. 7 (6.3),      | 1 (0.2) vs. 0 (0.0),        | 17 (22) vs. 23 (30), | 54 (8.65) vs. 59(5.88),    | /                             |
| n (%)               |   | p = 0.775                 | p = 0.48                    | p = 0.270            | p = 0.065                  |                               |

ACEI / ARB = angiotensin-converting enzyme inhibitor / angiotensin receptor blocker

1  
2  
3  
4  
5  
6  
7  
8  
9  
10  
11  
12  
13  
14  
15  
16  
17  
18  
19  
20  
21  
22  
23  
24  
25  
26  
27  
28  
29  
30  
31  
32  
33  
34  
35  
36  
37  
38  
39  
40  
41  
42  
43  
44  
45  
46

For peer review only

1  
2  
3  
4  
5  
6  
7  
8  
9  
10  
11  
12  
13  
14  
15  
16  
17  
18  
19  
20  
21  
22  
23  
24  
25  
26  
27  
28  
29  
30  
31  
32  
33  
34  
35  
36  
37  
38  
39  
40  
41  
42  
43  
44  
45  
46

**Table 2. Baseline characteristics of included studies.**

| Study          | Year | Design                                                    | Participants                           | Total aspirin | Without aspirin | Dosage of aspirin (mg) | MACE definition | MACE                                                                                                         | Myocardial infarction    | Cardiac death       | All cause death            | Follow-up            |        |
|----------------|------|-----------------------------------------------------------|----------------------------------------|---------------|-----------------|------------------------|-----------------|--------------------------------------------------------------------------------------------------------------|--------------------------|---------------------|----------------------------|----------------------|--------|
| Min Chul Kim   | 2013 | Retrospective analysis                                    | Vasospastic angina (stenosis ≤ 70%)    | 240           | 96              | 144                    | 100             | Readmission rate associated with recurrent angina, cardiac death, percutaneous coronary intervention         | 20 (20.8) vs. 29 (20.1)  | /                   | 1 (1.0) vs. 1 (0.7)        | /                    | 1-year |
| Masanobu Ishii | 2016 | Retrospective analysis, propensity score matched analysis | Vasospastic angina (stenosis ≤ 50%)    | 224           | 112             | 112                    | 81–100          | Cardiac death, nonfatal acute myocardial infarction, and unstable angina                                     | 4 (3.6) vs. 6 (5.4)      | 0 vs. 0             | 2 (1.8) vs. 0 (0)          | /                    | 1-year |
| A.Young Lim    | 2016 | Retrospective analysis, propensity score matched analysis | Coronary artery spasm (stenosis ≤ 50%) | 721           | 434             | 287                    | 100             | Cardiac death, acute myocardial infarction, revascularization, or rehospitalization due to recurrent angina. | 100 (23.0) vs. 34 (11.8) | 9 (2.1) vs. 2 (0.7) | 4 (0.9) vs. 3 (1.0), p=0.5 | 10 (2.2) vs. 9 (1.5) | 5-year |

|    |           |                           |                        |     |      |     |             |                                 |                          |               |             |             |           |
|----|-----------|---------------------------|------------------------|-----|------|-----|-------------|---------------------------------|--------------------------|---------------|-------------|-------------|-----------|
| 1  |           |                           |                        |     |      |     |             |                                 |                          |               |             |             |           |
| 2  |           |                           |                        |     |      |     |             |                                 |                          |               |             |             |           |
| 3  |           |                           |                        |     |      |     |             |                                 |                          |               |             |             |           |
| 4  |           |                           |                        |     |      |     |             |                                 |                          |               |             |             |           |
| 5  |           | Retrospective study,      | Coronary artery        |     |      |     |             | Chest pain recurrence,          |                          |               |             |             |           |
| 6  | Yonggu    | 2018 propensity score-    | spasm (stenosis ≤ 154  | 77  | 77   | 100 |             | myocardial infarction, cardiac  | 9 (11.7) vs. 2 (3) vs.13 |               | 0 vs. 0     | 0 vs. 0     | 4-year    |
| 7  | Lee       | matched analysis          | 50%)                   |     |      |     |             | death                           | 33 (42.9)                | (17)          |             |             |           |
| 8  |           |                           |                        |     |      |     |             |                                 |                          |               |             |             |           |
| 9  |           |                           |                        |     |      |     |             |                                 |                          |               |             |             |           |
| 10 |           |                           |                        |     |      |     |             |                                 |                          |               |             |             |           |
| 11 | Seong-Sik | 2019 Prospective          | Coronary artery        |     |      |     |             | all cause death, acute coronary | 29 (4.5) vs.             |               |             | 3 (0.5) vs. | 3-year    |
| 12 | Cho       | multicenter cohort        | spasm (stenosis ≤ 1652 | 641 | 1011 | 100 |             | syndrome, and symptomatic       | 44(4.4)                  | /             | /           | 7(0.7)      |           |
| 13 |           |                           | 50%)                   |     |      |     |             | arrhythmia                      |                          |               |             |             |           |
| 14 |           |                           |                        |     |      |     |             |                                 |                          |               |             |             |           |
| 15 |           |                           |                        |     |      |     |             |                                 |                          |               |             |             |           |
| 16 |           |                           |                        |     |      |     |             | cardiac death, nonfatal         |                          |               |             |             |           |
| 17 | Hiroyoshi | 2020 Retrospective study, | Coronary artery        |     |      |     | Aspirin 100 | myocardial infarction,          | 19 (5.7)                 | 1 (0.3) vs. 2 | 2 (0.6) vs. | 2 (0.6)     | 32-months |
| 18 | Mori      | propensity score-         | spasm (stenosis ≤ 670  | 335 | 335  |     | and P2Y12   | hospitalization due to unstable | vs. 12 (3.6)             | (0.6)         | 0 (0.0)     | vs. 6 (1.8) |           |
| 19 |           | matched analysis          | 50%)                   |     |      |     | inhibitors. | angina pectoris,                |                          |               |             |             |           |
| 20 |           |                           |                        |     |      |     |             | and appropriate ICD shock       |                          |               |             |             |           |
| 21 |           |                           |                        |     |      |     |             |                                 |                          |               |             |             |           |
| 22 |           |                           |                        |     |      |     |             |                                 |                          |               |             |             |           |
| 23 |           |                           |                        |     |      |     |             |                                 |                          |               |             |             |           |
| 24 |           |                           |                        |     |      |     |             |                                 |                          |               |             |             |           |
| 25 |           |                           |                        |     |      |     |             |                                 |                          |               |             |             |           |
| 26 |           |                           |                        |     |      |     |             |                                 |                          |               |             |             |           |
| 27 |           |                           |                        |     |      |     |             |                                 |                          |               |             |             |           |
| 28 |           |                           |                        |     |      |     |             |                                 |                          |               |             |             |           |
| 29 |           |                           |                        |     |      |     |             |                                 |                          |               |             |             |           |
| 30 |           |                           |                        |     |      |     |             |                                 |                          |               |             |             |           |
| 31 |           |                           |                        |     |      |     |             |                                 |                          |               |             |             |           |
| 32 |           |                           |                        |     |      |     |             |                                 |                          |               |             |             |           |
| 33 |           |                           |                        |     |      |     |             |                                 |                          |               |             |             |           |
| 34 |           |                           |                        |     |      |     |             |                                 |                          |               |             |             |           |
| 35 |           |                           |                        |     |      |     |             |                                 |                          |               |             |             |           |
| 36 |           |                           |                        |     |      |     |             |                                 |                          |               |             |             |           |
| 37 |           |                           |                        |     |      |     |             |                                 |                          |               |             |             |           |
| 38 |           |                           |                        |     |      |     |             |                                 |                          |               |             |             |           |
| 39 |           |                           |                        |     |      |     |             |                                 |                          |               |             |             |           |
| 40 |           |                           |                        |     |      |     |             |                                 |                          |               |             |             |           |
| 41 |           |                           |                        |     |      |     |             |                                 |                          |               |             |             |           |
| 42 |           |                           |                        |     |      |     |             |                                 |                          |               |             |             |           |
| 43 |           |                           |                        |     |      |     |             |                                 |                          |               |             |             |           |
| 44 |           |                           |                        |     |      |     |             |                                 |                          |               |             |             |           |
| 45 |           |                           |                        |     |      |     |             |                                 |                          |               |             |             |           |
| 46 |           |                           |                        |     |      |     |             |                                 |                          |               |             |             |           |

1  
2  
3  
4  
5  
6  
7  
8  
9  
10  
11  
12  
13  
14  
15  
16  
17  
18  
19  
20  
21  
22  
23  
24  
25  
26  
27  
28  
29  
30  
31  
32  
33  
34  
35  
36  
37  
38  
39  
40  
41  
42  
43  
44  
45  
46

For peer review only

**Table 3. Newcastle-Ottawa Quality Assessment Scale (NOS) for included studies.**

|                | Selection                                |                                     | Comparability             |                                                                          |                                                                 | Outcome               |                                                 |                                  |              |
|----------------|------------------------------------------|-------------------------------------|---------------------------|--------------------------------------------------------------------------|-----------------------------------------------------------------|-----------------------|-------------------------------------------------|----------------------------------|--------------|
| Study          | Representativeness of the exposed cohort | Selection of the non-exposed cohort | Ascertainment of exposure | Demonstration that outcome of interest was not present at start of study | Comparability of cohorts on the basis of the design or analysis | Assessment of outcome | Was follow-up long enough for outcomes to occur | Adequacy of follow up of cohorts | Total scores |
| Min Chul Kim   | ★                                        | ★                                   | ★                         | ★                                                                        | ☆☆                                                              | ★                     | ★                                               | ★                                | 8            |
| Masanobu Ishii | ★                                        | ☆                                   | ★                         | ★                                                                        | ★★                                                              | ★                     | ★                                               | ★                                | 8            |
| A. Young Lim   | ★                                        | ★                                   | ★                         | ★                                                                        | ☆☆                                                              | ★                     | ★                                               | ★                                | 8            |
| Yonggu Lee     | ★                                        | ★                                   | ★                         | ★                                                                        | ★★                                                              | ★                     | ★                                               | ★                                | 9            |
| Seong-Sik Cho  | ★                                        | ★                                   | ★                         | ★                                                                        | ☆☆                                                              | ★                     | ★                                               | ★                                | 8            |
| Hiroyoshi Mori | ☆                                        | ★                                   | ★                         | ★                                                                        | ☆☆                                                              | ★                     | ★                                               | ★                                | 7            |



1  
2  
3  
4  
5  
6  
7  
8 **Figure legends.**  
9

10  
11 Figure 1. Flow diagram for identification processes.  
12

13  
14 Figure 2. Aspirin use is not associated with a low incidence of MACE in patients with  
15  
16  
17 VSA.  
18

19  
20 Figure 3. Subgroup analysis of MACE with aspirin use in patients with VSA.  
21

22  
23  
24 Figure 4. Secondary endpoints including myocardial infarction, cardiac death, and all-  
25  
26  
27 cause death during 1–5 years of follow-up.  
28

29  
30 Figure 5. Assessment of bias risk of the studies.  
31  
32  
33  
34  
35  
36  
37  
38  
39  
40  
41  
42  
43  
44  
45  
46  
47  
48  
49  
50  
51  
52  
53  
54  
55  
56  
57  
58  
59  
60



Figure 1. Flow diagram for identification processes.

Figure 1. Flow diagram for identification processes.

139x148mm (144 x 144 DPI)



Figure 2. Aspirin use is not associated with a low incidence of MACE in patients with VSA.

231x135mm (144 x 144 DPI)

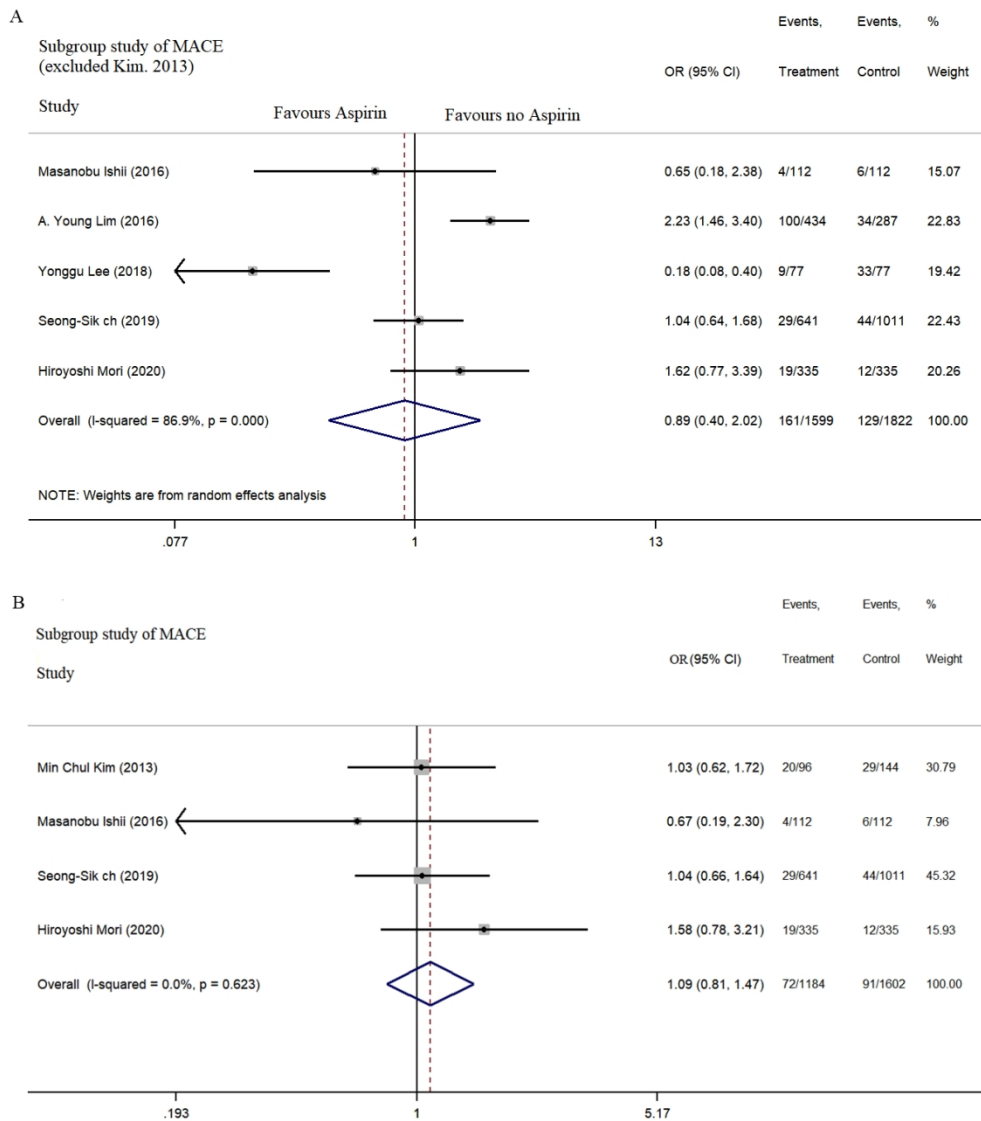

Figure 3. Subgroup analysis of MACE with aspirin use in patients with VSA.

358x411mm (96 x 96 DPI)



Figure 4. Secondary endpoints including myocardial infarction, cardiac death, and all-cause death during 1–5 years of follow-up.

240x305mm (144 x 144 DPI)



Figure 5. Assess of bias risk of the studies.

477x231mm (96 x 96 DPI)



# PRISMA 2009 Checklist

| Section/topic                      | #  | Checklist item                                                                                                                                                                                                                                                                                              | Reported on page # |
|------------------------------------|----|-------------------------------------------------------------------------------------------------------------------------------------------------------------------------------------------------------------------------------------------------------------------------------------------------------------|--------------------|
| <b>TITLE</b>                       |    |                                                                                                                                                                                                                                                                                                             |                    |
| Title                              | 1  | Identify the report as a systematic review, meta-analysis, or both.                                                                                                                                                                                                                                         | Page 1             |
| <b>ABSTRACT</b>                    |    |                                                                                                                                                                                                                                                                                                             |                    |
| Structured summary                 | 2  | Provide a structured summary including, as applicable: background; objectives; data sources; study eligibility criteria, participants, and interventions; study appraisal and synthesis methods; results; limitations; conclusions and implications of key findings; systematic review registration number. | Page 2             |
| <b>INTRODUCTION</b>                |    |                                                                                                                                                                                                                                                                                                             |                    |
| Rationale                          | 3  | Describe the rationale for the review in the context of what is already known.                                                                                                                                                                                                                              | Page 4             |
| Objectives                         | 4  | Provide an explicit statement of questions being addressed with reference to participants, interventions, comparisons, outcomes, and study design (PICOS).                                                                                                                                                  | Page 4             |
| <b>METHODS</b>                     |    |                                                                                                                                                                                                                                                                                                             |                    |
| Protocol and registration          | 5  | Indicate if a review protocol exists, if and where it can be accessed (e.g., Web address), and, if available, provide registration information including registration number.                                                                                                                               | Page 4-5           |
| Eligibility criteria               | 6  | Specify study characteristics (e.g., PICOS, length of follow-up) and report characteristics (e.g., years considered, language, publication status) used as criteria for eligibility, giving rationale.                                                                                                      | Page 4-5           |
| Information sources                | 7  | Describe all information sources (e.g., databases with dates of coverage, contact with study authors to identify additional studies) in the search and date last searched.                                                                                                                                  | Page 4-5           |
| Search                             | 8  | Present full electronic search strategy for at least one database, including any limits used, such that it could be repeated.                                                                                                                                                                               | Page 4-5           |
| Study selection                    | 9  | State the process for selecting studies (i.e., screening, eligibility, included in systematic review, and, if applicable, included in the meta-analysis).                                                                                                                                                   | Page 4-5           |
| Data collection process            | 10 | Describe method of data extraction from reports (e.g., piloted forms, independently, in duplicate) and any processes for obtaining and confirming data from investigators.                                                                                                                                  | Page 4-5           |
| Data items                         | 11 | List and define all variables for which data were sought (e.g., PICOS, funding sources) and any assumptions and simplifications made.                                                                                                                                                                       | Page 4-5           |
| Risk of bias in individual studies | 12 | Describe methods used for assessing risk of bias of individual studies (including specification of whether this was done at the study or outcome level), and how this information is to be used in any data synthesis.                                                                                      | Page 4-5           |
| Summary measures                   | 13 | State the principal summary measures (e.g., risk ratio, difference in means).                                                                                                                                                                                                                               | Page 4-5           |
| Synthesis of results               | 14 | Describe the methods of handling data and combining results of studies, if done, including measures of consistency (e.g., $I^2$ ) for each meta-analysis.                                                                                                                                                   | Page 4-5           |

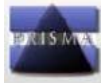

# PRISMA 2009 Checklist

Page 1 of 2

| Section/topic                 | #  | Checklist item                                                                                                                                                                                           | Reported on page # |
|-------------------------------|----|----------------------------------------------------------------------------------------------------------------------------------------------------------------------------------------------------------|--------------------|
| Risk of bias across studies   | 15 | Specify any assessment of risk of bias that may affect the cumulative evidence (e.g., publication bias, selective reporting within studies).                                                             | Page 4-5           |
| Additional analyses           | 16 | Describe methods of additional analyses (e.g., sensitivity or subgroup analyses, meta-regression), if done, indicating which were pre-specified.                                                         | Page 5             |
| <b>RESULTS</b>                |    |                                                                                                                                                                                                          |                    |
| Study selection               | 17 | Give numbers of studies screened, assessed for eligibility, and included in the review, with reasons for exclusions at each stage, ideally with a flow diagram.                                          | Page 6-7           |
| Study characteristics         | 18 | For each study, present characteristics for which data were extracted (e.g., study size, PICOS, follow-up period) and provide the citations.                                                             | Page 6-7           |
| Risk of bias within studies   | 19 | Present data on risk of bias of each study and, if available, any outcome level assessment (see item 12).                                                                                                | Page 6-7           |
| Results of individual studies | 20 | For all outcomes considered (benefits or harms), present, for each study: (a) simple summary data for each intervention group (b) effect estimates and confidence intervals, ideally with a forest plot. | Page 6-7           |
| Synthesis of results          | 21 | Present results of each meta-analysis done, including confidence intervals and measures of consistency.                                                                                                  | Page 6-7           |
| Risk of bias across studies   | 22 | Present results of any assessment of risk of bias across studies (see Item 15).                                                                                                                          | Page 6-7           |
| Additional analysis           | 23 | Give results of additional analyses, if done (e.g., sensitivity or subgroup analyses, meta-regression [see Item 16]).                                                                                    | Page 6-7           |
| <b>DISCUSSION</b>             |    |                                                                                                                                                                                                          |                    |
| Summary of evidence           | 24 | Summarize the main findings including the strength of evidence for each main outcome; consider their relevance to key groups (e.g., healthcare providers, users, and policy makers).                     | Page 7-10          |
| Limitations                   | 25 | Discuss limitations at study and outcome level (e.g., risk of bias), and at review-level (e.g., incomplete retrieval of identified research, reporting bias).                                            | Page 10            |
| Conclusions                   | 26 | Provide a general interpretation of the results in the context of other evidence, and implications for future research.                                                                                  | Page 10            |
| <b>FUNDING</b>                |    |                                                                                                                                                                                                          |                    |
| Funding                       | 27 | Describe sources of funding for the systematic review and other support (e.g., supply of data); role of funders for the systematic review.                                                               | Page 11            |

From: Moher D, Liberati A, Tetzlaff J, Altman DG, The PRISMA Group (2009). Preferred Reporting Items for Systematic Reviews and Meta-Analyses: The PRISMA Statement. PLoS Med 6(6): e1000097. doi:10.1371/journal.pmed1000097

For peer review only, <http://bmjopen.bmj.com/site/about/guidelines.xhtml>  
For more information, visit: [www.prisma-statement.org](http://www.prisma-statement.org)





# PRISMA 2009 Checklist

- 1
- 2
- 3
- 4
- 5
- 6
- 7
- 8
- 9
- 10
- 11
- 12
- 13
- 14
- 15
- 16
- 17
- 18
- 19
- 20
- 21
- 22
- 23
- 24
- 25
- 26
- 27
- 28
- 29
- 30
- 31
- 32
- 33
- 34
- 35
- 36
- 37
- 38
- 39
- 40
- 41
- 42
- 43
- 44
- 45
- 46
- 47

For peer review only
